# Supplementary material for: Cuticle layer forms a reproductive barrier in the Brassicaceae
Source: Research Square preprint supplement (doi:10.21203/rs.3.rs-5955674/v1), 2025-03-14
Supplement: Supplementary file 1 [file a3a5387df50feb1e41c6c933.xlsx]

## Sheet: Supplementary Table 1
Supplementary Table 1 | Oligonucleotides used in this study.
Name	Sequence (5' > 3')	Experiment
pCam_EcoRI_inf_pBI121_NosT_F	cccgggtaccgagctcgaattTCCCCGATCGTTCAAACATTTGGC	Subcloning the nos terminator into pCambia1300
pCam_EcoRI_inf_pBI121_NosT_R	ctatgacatgattacgaattcCCGATCTAGTAACATAGATGACACCG	Subcloning the nos terminator into pCambia1300
pCam_HindIII_inf_AtS1pro_F	acgacggccagtgccaagcTTCGAAATACATCGAGAAGATTA	Subcloning the AtS1 promoter into pCambia1300
pCam_BamHI_inf_AtS1pro_R	cctcggtacccggggatccCTTCACGACTTTCTTTCTTATGCTC	Subcloning the AtS1 promoter into pCambia1300
AtS1pro-CDEF1CDS-F	agaaagaaagtcgtgaagATGGTCGAGGGAGAGTCCAA	Subcloning the CDEF1 conding sequence into pCambia1300_AtS1pro
pCamSac-CDEF1CDS-R	gatcggggaaattcgagctcTTAATTCACTAACTGGGATATGTTGAACGG	Subcloning the CDEF1 conding sequence into pCambia1300_AtS1pro
pCambia_inf_CYP86a2_pro_F	ggccagtgccaagcttCAGCTGTAATGGGAATTGTGATTC	Constrcution for CYP86a2-Venus
CYP86a2_no_stop_R	CACGGCAACCGCCACAGCC	Constrcution for CYP86a2-Venus
CYP86a2_Cter_GGGSx3_Venus_F	ggctgtggcggttgccgtgGGAGGAGGGAGTGGAGGGGGGGGCAGTGGGGGAGGCTCAGTgagcaagggcgagga	Constrcution for CYP86a2-Venus
CYP86a2_3UTR_Venus_R	tatcaacccgagaagctgcaTCACTTGTACAGCTCGTCC	Constrcution for CYP86a2-Venus
CYP86a2_3UTR_F	TGCAGCTTCTCGGGTTGATA	Constrcution for CYP86a2-Venus
pCambia_inf_CYP86a2_ter_R	gggaaattcgagctcCAGCTGAGCCATGTCAAAACTCCAG	Constrcution for CYP86a2-Venus
pHEE401E_inf_NPTII_F	ggggagaggcggtttGATCATGAGCGGAGAATTAAGGGAG	Construction for pHEE401E_NPTII
pHEE401E_inf_NPTII_R	cggtcggcatctactCCCGATCTAGTAACATAGATGACAC	Construction for pHEE401E_NPTII
BDG_gR1_pHEE2E-TRI_F	aataatggtctctattgTCAATGTCCAACAGCCCACgttttagagctagaaatagc	Construction for genome editing of BDG
BDG_gR2_pHEE2E-TRI_R	attattggtctctaaacCGTGGAGTGCAGCTACGGCcaatctcttagtcgactctac	Construction for genome editing of BDG

## Sheet: Supplementary Table 2
Supplementary Table 2 | Raw data of wave number and absorbance intensity in Fig. 4 and Extended Fig. 4.
Col-0			AtS1pro::CDEF1/Col-0			bdg-ge2			M. littorea			spri1-1
Wave number (cm-1)	Intensity (a.u.)		Wave number (cm-1)	Intensity (a.u.)		Wave number (cm-1)	Intensity (a.u.)		Wave number (cm-1)	Intensity (a.u.)		Wave number (cm-1)	Intensity (a.u.)
399.209	0		399.209	0		399.209	0		399.209	0		399.209	0
401.138	0		401.138	0		401.138	0		401.138	0		401.138	0
403.067	0		403.067	0		403.067	0		403.067	0		403.067	0
404.995	0		404.995	0		404.995	0		404.995	0		404.995	0
406.924	0		406.924	0		406.924	0		406.924	0		406.924	0
408.852	0		408.852	0		408.852	0		408.852	0		408.852	0
410.781	0		410.781	0		410.781	0		410.781	0		410.781	0
412.709	0		412.709	0		412.709	0		412.709	0		412.709	0
414.638	0		414.638	0		414.638	0		414.638	0		414.638	0
416.566	0		416.566	0		416.566	0		416.566	0		416.566	0
418.495	0		418.495	0		418.495	0		418.495	0		418.495	0
420.423	0		420.423	0		420.423	0		420.423	0		420.423	0
422.352	0		422.352	0		422.352	0		422.352	0		422.352	0
424.281	0		424.281	0		424.281	0		424.281	0		424.281	0
426.209	0		426.209	0		426.209	0		426.209	0		426.209	0
428.138	0		428.138	0		428.138	0		428.138	0		428.138	0
430.066	0		430.066	0		430.066	0		430.066	0		430.066	0
431.995	0		431.995	0		431.995	0		431.995	0		431.995	0
433.923	0		433.923	0		433.923	0		433.923	0		433.923	0
435.852	0		435.852	0		435.852	0		435.852	0		435.852	0
437.78	0		437.78	0		437.78	0		437.78	0		437.78	0
439.709	0		439.709	0		439.709	0		439.709	0		439.709	0
441.637	0		441.637	0		441.637	0		441.637	0		441.637	0
443.566	0		443.566	0		443.566	0		443.566	0		443.566	0
445.495	0		445.495	0		445.495	0		445.495	0		445.495	0
447.423	0		447.423	0		447.423	0		447.423	0		447.423	0
449.352	0		449.352	0		449.352	0		449.352	0		449.352	0
451.28	0		451.28	0		451.28	0		451.28	0		451.28	0
453.209	0		453.209	0		453.209	0		453.209	0		453.209	0
455.137	0		455.137	0		455.137	0		455.137	0		455.137	0
457.066	0		457.066	0		457.066	0		457.066	0		457.066	0
458.994	0		458.994	0		458.994	0		458.994	0		458.994	0
460.923	0		460.923	0		460.923	0		460.923	0		460.923	0
462.851	0		462.851	0		462.851	0		462.851	0		462.851	0
464.78	0		464.78	0		464.78	0		464.78	0		464.78	0
466.709	0		466.709	0		466.709	0		466.709	0		466.709	0
468.637	0		468.637	0		468.637	0		468.637	0		468.637	0
470.566	0		470.566	0		470.566	0		470.566	0		470.566	0
472.494	0		472.494	0		472.494	0		472.494	0		472.494	0
474.423	0		474.423	0		474.423	0		474.423	0		474.423	0
476.351	0		476.351	0		476.351	0		476.351	0		476.351	0
478.28	0		478.28	0		478.28	0		478.28	0		478.28	0
480.209	0		480.209	0		480.209	0		480.209	0		480.209	0
482.137	0		482.137	0		482.137	0		482.137	0		482.137	0
484.066	0		484.066	0		484.066	0		484.066	0		484.066	0
485.994	0		485.994	0		485.994	0		485.994	0		485.994	0
487.923	0		487.923	0		487.923	0		487.923	0		487.923	0
489.851	0		489.851	0		489.851	0		489.851	0		489.851	0
491.78	0		491.78	0		491.78	0		491.78	0		491.78	0
493.708	0		493.708	0		493.708	0		493.708	0		493.708	0
495.637	0		495.637	0		495.637	0		495.637	0		495.637	0
497.565	0		497.565	0		497.565	0		497.565	0		497.565	0
499.494	0		499.494	0		499.494	0		499.494	0		499.494	0
501.423	0		501.423	0		501.423	0		501.423	0		501.423	0
503.351	0		503.351	0		503.351	0		503.351	0		503.351	0
505.28	0		505.28	0		505.28	0		505.28	0		505.28	0
507.208	0		507.208	0		507.208	0		507.208	0		507.208	0
509.137	0		509.137	0		509.137	0		509.137	0		509.137	0
511.065	0		511.065	0		511.065	0		511.065	0		511.065	0
512.994	0		512.994	0		512.994	0		512.994	0		512.994	0
514.922	0		514.922	0		514.922	0		514.922	0		514.922	0
516.851	0		516.851	0		516.851	0		516.851	0		516.851	0
518.779	0		518.779	0		518.779	0		518.779	0		518.779	0
520.708	0		520.708	0		520.708	0		520.708	0		520.708	0
522.636	0		522.636	0		522.636	0		522.636	0		522.636	0
524.565	0		524.565	0		524.565	0		524.565	0		524.565	0
526.494	0		526.494	0		526.494	0		526.494	0		526.494	0
528.422	0		528.422	0		528.422	0		528.422	0		528.422	0
530.351	0		530.351	0		530.351	0		530.351	0		530.351	0
532.279	0		532.279	0		532.279	0		532.279	0		532.279	0
534.208	0		534.208	0		534.208	0		534.208	0		534.208	0
536.136	0		536.136	0		536.136	0		536.136	0		536.136	0
538.065	0		538.065	0		538.065	0		538.065	0		538.065	0
539.993	0		539.993	0		539.993	0		539.993	0		539.993	0
541.922	0		541.922	0		541.922	0		541.922	0		541.922	0
543.851	0		543.851	0		543.851	0		543.851	0		543.851	0
545.779	0		545.779	0		545.779	0		545.779	0		545.779	0
547.708	0		547.708	0		547.708	0		547.708	0		547.708	0
549.636	0		549.636	0		549.636	0		549.636	0		549.636	0
551.565	0		551.565	0		551.565	0		551.565	0		551.565	0
553.493	0		553.493	0		553.493	0		553.493	0		553.493	0
555.422	0		555.422	0		555.422	0		555.422	0		555.422	0
557.35	0		557.35	0		557.35	0		557.35	0		557.35	0
559.279	0		559.279	0		559.279	0		559.279	0		559.279	0
561.207	0		561.207	0		561.207	0		561.207	0		561.207	0
563.136	0		563.136	0		563.136	0		563.136	0		563.136	0
565.065	0		565.065	0		565.065	0		565.065	0		565.065	0
566.993	0		566.993	0		566.993	0		566.993	0		566.993	0
568.922	0		568.922	0		568.922	0		568.922	0		568.922	0
570.85	0		570.85	0		570.85	0		570.85	0		570.85	0
572.779	0		572.779	0		572.779	0		572.779	0		572.779	0
574.707	0		574.707	0		574.707	0		574.707	0		574.707	0
576.636	0		576.636	0		576.636	0		576.636	0		576.636	0
578.564	0		578.564	0		578.564	0		578.564	0		578.564	0
580.493	0		580.493	0		580.493	0		580.493	0		580.493	0
582.422	0		582.422	0		582.422	0		582.422	0		582.422	0
584.35	0		584.35	0		584.35	0		584.35	0		584.35	0
586.279	0		586.279	0		586.279	0		586.279	0		586.279	0
588.207	0		588.207	0		588.207	0		588.207	0		588.207	0
590.136	0		590.136	0		590.136	0		590.136	0		590.136	0
592.064	0		592.064	0		592.064	0		592.064	0		592.064	0
593.993	0		593.993	0		593.993	0		593.993	0		593.993	0
595.921	0		595.921	0		595.921	0		595.921	0		595.921	0
597.85	0		597.85	0		597.85	0		597.85	0		597.85	0
599.778	0		599.778	0		599.778	0		599.778	0		599.778	0
601.707	0		601.707	0		601.707	0		601.707	0		601.707	0
603.635	0		603.635	0		603.635	0		603.635	0		603.635	0
605.564	0		605.564	0		605.564	0		605.564	0		605.564	0
607.493	0		607.493	0		607.493	0		607.493	0		607.493	0
609.421	0		609.421	0		609.421	0		609.421	0		609.421	0
611.35	0		611.35	0		611.35	0		611.35	0		611.35	0
613.278	0		613.278	0		613.278	0		613.278	0		613.278	0
615.207	0		615.207	0		615.207	0		615.207	0		615.207	0
617.135	0		617.135	0		617.135	0		617.135	0		617.135	0
619.064	0		619.064	0		619.064	0		619.064	0		619.064	0
620.992	0		620.992	0		620.992	0		620.992	0		620.992	0
622.921	0		622.921	0		622.921	0		622.921	0		622.921	0
624.85	0		624.85	0		624.85	0		624.85	0		624.85	0
626.778	0		626.778	0		626.778	0		626.778	0		626.778	0
628.707	0		628.707	0		628.707	0		628.707	0		628.707	0
630.635	0		630.635	0		630.635	0		630.635	0		630.635	0
632.564	0		632.564	0		632.564	0		632.564	0		632.564	0
634.492	0		634.492	0		634.492	0		634.492	0		634.492	0
636.421	0		636.421	0		636.421	0		636.421	0		636.421	0
638.349	0		638.349	0		638.349	0		638.349	0		638.349	0
640.278	0		640.278	0		640.278	0		640.278	0		640.278	0
642.207	0		642.207	0		642.207	0		642.207	0		642.207	0
644.135	0		644.135	0		644.135	0		644.135	0		644.135	0
646.064	0		646.064	0		646.064	0		646.064	0		646.064	0
647.992	0		647.992	0		647.992	0		647.992	0		647.992	0
649.921	0		649.921	0		649.921	0		649.921	0		649.921	0
651.849	0		651.849	0		651.849	0		651.849	0		651.849	0
653.778	0		653.778	0		653.778	0		653.778	0		653.778	0
655.706	0		655.706	0		655.706	0		655.706	0		655.706	0
657.635	0		657.635	0		657.635	0		657.635	0		657.635	0
659.563	0		659.563	0		659.563	0		659.563	0		659.563	0
661.492	0		661.492	0		661.492	0		661.492	0		661.492	0
663.42	0		663.42	0		663.42	0		663.42	0		663.42	0
665.349	0		665.349	0		665.349	0		665.349	0		665.349	0
667.278	0		667.278	0		667.278	0		667.278	0		667.278	0
669.206	0		669.206	0		669.206	0		669.206	0		669.206	0
671.135	0		671.135	0		671.135	0		671.135	0		671.135	0
673.063	0		673.063	0		673.063	0		673.063	0		673.063	0
674.992	0.123818		674.992	0.0393864		674.992	0.0661694		674.992	0.0786033		674.992	0.0716722
676.92	0.122535		676.92	0.0389729		676.92	0.0652717		676.92	0.0780609		676.92	0.070777
678.849	0.122612		678.849	0.0388405		678.849	0.0652012		678.849	0.0780016		678.849	0.0706559
680.778	0.121775		680.778	0.0380986		680.778	0.064933		680.778	0.0773227		680.778	0.070228
682.706	0.121333		682.706	0.0375642		682.706	0.0649745		682.706	0.0771731		682.706	0.070335
684.635	0.120344		684.635	0.0370367		684.635	0.0642531		684.635	0.0767054		684.635	0.0699609
686.563	0.120281		686.563	0.036517		686.563	0.063815		686.563	0.0765474		686.563	0.0699421
688.492	0.119786		688.492	0.0362208		688.492	0.063525		688.492	0.0762043		688.492	0.0696543
690.42	0.11978		690.42	0.0362073		690.42	0.0633095		690.42	0.0760908		690.42	0.0695044
692.349	0.118827		692.349	0.0358012		692.349	0.0626952		692.349	0.0754182		692.349	0.0690053
694.277	0.118153		694.277	0.0354545		694.277	0.0624721		694.277	0.0752078		694.277	0.0687726
696.206	0.117377		696.206	0.0351797		696.206	0.0620308		696.206	0.0745806		696.206	0.0683594
698.134	0.117144		698.134	0.0350196		698.134	0.0617137		698.134	0.0740777		698.134	0.0681564
700.063	0.116516		700.063	0.0347106		700.063	0.0612282		700.063	0.0735918		700.063	0.0677965
701.991	0.116054		701.991	0.0346027		701.991	0.0608401		701.991	0.0732735		701.991	0.0675916
703.92	0.114934		703.92	0.0343389		703.92	0.0602687		703.92	0.0724673		703.92	0.0669764
705.849	0.114353		705.849	0.0339143		705.849	0.0598587		705.849	0.0721953		705.849	0.0665648
707.777	0.113541		707.777	0.0335573		707.777	0.0592461		707.777	0.0717024		707.777	0.066182
709.706	0.112913		709.706	0.0334484		709.706	0.0588522		709.706	0.0712695		709.706	0.0657961
711.634	0.111849		711.634	0.0331174		711.634	0.0584805		711.634	0.0707776		711.634	0.0650659
713.563	0.111353		713.563	0.0328554		713.563	0.0582705		713.563	0.0704377		713.563	0.0647688
715.491	0.110662		715.491	0.0328334		715.491	0.0578795		715.491	0.0696918		715.491	0.0643305
717.42	0.110129		717.42	0.0329874		717.42	0.0578931		717.42	0.0693288		717.42	0.0640646
719.348	0.109071		719.348	0.0326413		719.348	0.0576483		719.348	0.0691569		719.348	0.0636579
721.277	0.108275		721.277	0.0323149		721.277	0.0571604		721.277	0.0690456		721.277	0.0633108
723.206	0.107393		723.206	0.0318891		723.206	0.0563311		723.206	0.06816		723.206	0.0627148
725.134	0.10667		725.134	0.0313981		725.134	0.0555863		725.134	0.0674366		725.134	0.0621533
727.063	0.10537		727.063	0.0310259		727.063	0.0548413		727.063	0.0668087		727.063	0.0613994
728.991	0.104517		728.991	0.0307997		728.991	0.0543963		728.991	0.0663266		728.991	0.0609295
730.92	0.103482		730.92	0.0304233		730.92	0.0535604		730.92	0.0654817		730.92	0.0602656
732.848	0.102671		732.848	0.0299622		732.848	0.0530204		732.848	0.0648545		732.848	0.0596769
734.777	0.101413		734.777	0.0295119		734.777	0.0525692		734.777	0.0640789		734.777	0.0590136
736.705	0.100483		736.705	0.0293045		736.705	0.0520825		736.705	0.0637033		736.705	0.0586133
738.634	0.099352		738.634	0.028945		738.634	0.0515265		738.634	0.0631543		738.634	0.0578798
740.562	0.0986502		740.562	0.028545		740.562	0.0512551		740.562	0.0625537		740.562	0.0572909
742.491	0.0976256		742.491	0.0282273		742.491	0.0508017		742.491	0.0619326		742.491	0.0566805
744.42	0.0970438		744.42	0.0282183		744.42	0.0505945		744.42	0.0617115		744.42	0.0562834
746.348	0.0960586		746.348	0.0280826		746.348	0.0502276		746.348	0.0612001		746.348	0.0558019
748.277	0.0953514		748.277	0.0278418		748.277	0.0498908		748.277	0.0607682		748.277	0.0555962
750.205	0.0944549		750.205	0.0275529		750.205	0.0493354		750.205	0.0600651		750.205	0.0550782
752.134	0.0937016		752.134	0.0274731		752.134	0.0489521		752.134	0.0596484		752.134	0.0545885
754.062	0.0926387		754.062	0.0272444		754.062	0.0484724		754.062	0.0591633		754.062	0.0539574
755.991	0.0920625		755.991	0.0270712		755.991	0.0481264		755.991	0.0588535		755.991	0.0536374
757.919	0.0911987		757.919	0.0268989		757.919	0.0477909		757.919	0.0582233		757.919	0.0533093
759.848	0.0904258		759.848	0.0267795		759.848	0.0475103		759.848	0.0576036		759.848	0.0529167
761.777	0.0894463		761.777	0.0265482		761.777	0.0468444		761.777	0.0571488		761.777	0.0522415
763.705	0.088932		763.705	0.0263402		763.705	0.0465426		763.705	0.0570649		763.705	0.0519281
765.634	0.0881987		765.634	0.0260301		765.634	0.0462383		765.634	0.0564672		765.634	0.0515509
767.562	0.0875194		767.562	0.0258302		767.562	0.045826		767.562	0.0558652		767.562	0.0511589
769.491	0.0864928		769.491	0.0256611		769.491	0.0453458		769.491	0.0551608		769.491	0.0505912
771.419	0.085728		771.419	0.0254741		771.419	0.0450883		771.419	0.054575		771.419	0.0501632
773.348	0.08475		773.348	0.0252339		773.348	0.0446934		773.348	0.053919		773.348	0.0496627
775.276	0.0839945		775.276	0.0251009		775.276	0.0442359		775.276	0.0535098		775.276	0.0492755
777.205	0.0829727		777.205	0.0247646		777.205	0.0436481		777.205	0.052888		777.205	0.0486746
779.133	0.0823009		779.133	0.0243901		779.133	0.0431791		779.133	0.0523839		779.133	0.048201
781.062	0.0815003		781.062	0.0241967		781.062	0.0425604		781.062	0.0518845		781.062	0.0477197
782.99	0.0807258		782.99	0.0240019		782.99	0.0421301		782.99	0.0514615		782.99	0.0472952
784.919	0.0797789		784.919	0.0236035		784.919	0.0417054		784.919	0.0509634		784.919	0.0467465
786.848	0.0789443		786.848	0.0234196		786.848	0.0412274		786.848	0.0504666		786.848	0.0462801
788.776	0.0778678		788.776	0.0231554		788.776	0.0406021		788.776	0.049815		788.776	0.0456165
790.705	0.077072		790.705	0.0227981		790.705	0.040169		790.705	0.0493326		790.705	0.0451045
792.633	0.0761845		792.633	0.0224983		792.633	0.0396491		792.633	0.0487058		792.633	0.0446414
794.562	0.0755352		794.562	0.0223423		794.562	0.0390921		794.562	0.0481539		794.562	0.0442062
796.49	0.0747006		796.49	0.0220905		796.49	0.0384953		796.49	0.0475184		796.49	0.0436132
798.419	0.0738482		798.419	0.0218445		798.419	0.038153		798.419	0.0471491		798.419	0.0431297
800.347	0.0728332		800.347	0.021679		800.347	0.0376188		800.347	0.0468142		800.347	0.0425985
802.276	0.072171		802.276	0.0215962		802.276	0.0370413		802.276	0.0463609		802.276	0.0422108
804.205	0.0714766		804.205	0.0214128		804.205	0.0366185		804.205	0.0456803		804.205	0.041826
806.133	0.0707699		806.133	0.0212035		806.133	0.036272		806.133	0.045269		806.133	0.041502
808.062	0.0697827		808.062	0.0209801		808.062	0.0357604		808.062	0.044782		808.062	0.0409529
809.99	0.0690653		809.99	0.0208048		809.99	0.0354229		809.99	0.0443726		809.99	0.0404756
811.919	0.0682529		811.919	0.0206364		811.919	0.0349904		811.919	0.043766		811.919	0.0398869
813.847	0.0675763		813.847	0.0204894		813.847	0.0345823		813.847	0.0431323		813.847	0.039407
815.776	0.066808		815.776	0.020212		815.776	0.0340437		815.776	0.0424028		815.776	0.0389901
817.704	0.0660417		817.704	0.0199257		817.704	0.0335481		817.704	0.0419022		817.704	0.0385828
819.633	0.0651873		819.633	0.0195749		819.633	0.0331293		819.633	0.0414249		819.633	0.0382199
821.562	0.0644481		821.562	0.019405		821.562	0.0328281		821.562	0.0409035		821.562	0.0378664
823.49	0.0635089		823.49	0.0192059		823.49	0.0324517		823.49	0.0402557		823.49	0.0373545
825.419	0.0627623		825.419	0.0189588		825.419	0.0320103		825.419	0.0398172		825.419	0.0369618
827.347	0.0618846		827.347	0.0187472		827.347	0.031499		827.347	0.039372		827.347	0.0363771
829.276	0.0610586		829.276	0.0185487		829.276	0.0311565		829.276	0.0390058		829.276	0.0358311
831.204	0.0601181		831.204	0.0183047		831.204	0.0308496		831.204	0.0384922		831.204	0.0352917
833.133	0.0594051		833.133	0.018172		833.133	0.0305033		833.133	0.0378658		833.133	0.0348579
835.061	0.0586561		835.061	0.0179456		835.061	0.0299624		835.061	0.0370042		835.061	0.0343142
836.99	0.0579892		836.99	0.0176446		836.99	0.0294347		836.99	0.0363231		836.99	0.033818
838.918	0.0571023		838.918	0.0172576		838.918	0.0288169		838.918	0.035741		838.918	0.0332182
840.847	0.0562814		840.847	0.0169948		840.847	0.0282478		840.847	0.0352151		840.847	0.032722
842.775	0.0554108		842.775	0.0166813		842.775	0.0276697		842.775	0.0345336		842.775	0.0322121
844.704	0.0546571		844.704	0.0162695		844.704	0.0272332		844.704	0.0339591		844.704	0.0316399
846.633	0.0537287		846.633	0.0159059		846.633	0.0268553		846.633	0.0334903		846.633	0.0310465
848.561	0.0528596		848.561	0.0156097		848.561	0.0264737		848.561	0.0330374		848.561	0.0305904
850.49	0.0519264		850.49	0.0153982		850.49	0.0259761		850.49	0.0323755		850.49	0.0301103
852.418	0.0512625		852.418	0.0152923		852.418	0.0256428		852.418	0.0318125		852.418	0.0297398
854.347	0.050632		854.347	0.0151308		854.347	0.0252475		854.347	0.0313975		854.347	0.0294052
856.275	0.0499299		856.275	0.0150225		856.275	0.0248863		856.275	0.0310216		856.275	0.0290058
858.204	0.0490691		858.204	0.0147578		858.204	0.0244661		858.204	0.0305701		858.204	0.0284725
860.132	0.0482714		860.132	0.0143722		860.132	0.0239891		860.132	0.0301475		860.132	0.02812
862.061	0.0475422		862.061	0.0140894		862.061	0.0235267		862.061	0.0296212		862.061	0.0277561
863.99	0.0469382		863.99	0.0139765		863.99	0.0231402		863.99	0.0291719		863.99	0.0273198
865.918	0.0461653		865.918	0.0138454		865.918	0.0227517		865.918	0.0288357		865.918	0.0268533
867.847	0.0455115		867.847	0.0137672		867.847	0.0224398		867.847	0.0286053		867.847	0.026505
869.775	0.0449464		869.775	0.0137784		869.775	0.0221419		869.775	0.0281955		869.775	0.0262345
871.704	0.044466		871.704	0.0138313		871.704	0.0219028		871.704	0.0277793		871.704	0.0259685
873.632	0.0438018		873.632	0.0138574		873.632	0.021652		873.632	0.0274474		873.632	0.025598
875.561	0.0432992		875.561	0.0139354		875.561	0.0214901		875.561	0.0271307		875.561	0.0253322
877.489	0.0428405		877.489	0.0139618		877.489	0.0212651		877.489	0.0267763		877.489	0.0250624
879.418	0.0423367		879.418	0.0140253		879.418	0.0210546		879.418	0.0264984		879.418	0.0247207
881.346	0.0416971		881.346	0.0140282		881.346	0.0207708		881.346	0.0262212		881.346	0.0242987
883.275	0.041155		883.275	0.0139615		883.275	0.0204604		883.275	0.025929		883.275	0.0239434
885.203	0.0406268		885.203	0.0138917		885.203	0.0202655		885.203	0.0256397		885.203	0.023642
887.132	0.0401298		887.132	0.0138343		887.132	0.0201183		887.132	0.025421		887.132	0.0233104
889.061	0.0395605		889.061	0.0138488		889.061	0.0199325		889.061	0.0250524		889.061	0.0229341
890.989	0.0390717		890.989	0.0138384		890.989	0.0197551		890.989	0.0246439		890.989	0.022697
892.918	0.0385405		892.918	0.0137088		892.918	0.0195444		892.918	0.0242803		892.918	0.0224111
894.846	0.0380207		894.846	0.0136397		894.846	0.0193945		894.846	0.0239984		894.846	0.0220752
896.775	0.0374585		896.775	0.0135725		896.775	0.0191352		896.775	0.0236837		896.775	0.0217452
898.703	0.0369839		898.703	0.0134286		898.703	0.018828		898.703	0.0233219		898.703	0.0214575
900.632	0.0365574		900.632	0.0131673		900.632	0.0185191		900.632	0.0228867		900.632	0.02123
902.56	0.0360805		902.56	0.0128712		902.56	0.0182308		902.56	0.0225338		902.56	0.0209738
904.489	0.0354863		904.489	0.012693		904.489	0.0179262		904.489	0.0221674		904.489	0.0206272
906.418	0.0350033		906.418	0.0126029		906.418	0.0176095		906.418	0.0218876		906.418	0.0203162
908.346	0.0344957		908.346	0.0125171		908.346	0.0172681		908.346	0.0216813		908.346	0.020011
910.275	0.034052		910.275	0.0125514		910.275	0.0169987		910.275	0.0214897		910.275	0.0197184
912.203	0.0335875		912.203	0.012583		912.203	0.0168097		912.203	0.021301		912.203	0.0194288
914.132	0.0332168		914.132	0.0126167		914.132	0.0166469		914.132	0.0211424		914.132	0.0192818
916.06	0.0328154		916.06	0.0126294		916.06	0.0164712		916.06	0.0208986		916.06	0.0190834
917.989	0.0323895		917.989	0.0125646		917.989	0.016335		917.989	0.020715		917.989	0.0188075
919.917	0.0319661		919.917	0.0124841		919.917	0.0161852		919.917	0.0205809		919.917	0.0185564
921.846	0.0316464		921.846	0.0124745		921.846	0.0159604		921.846	0.0204454		921.846	0.0183464
923.774	0.0312449		923.774	0.0124575		923.774	0.0156621		923.774	0.0201723		923.774	0.0180916
925.703	0.030855		925.703	0.0124019		925.703	0.015456		925.703	0.0198684		925.703	0.017829
927.632	0.0304455		927.632	0.0123486		927.632	0.0152794		927.632	0.0195677		927.632	0.0175915
929.56	0.0301028		929.56	0.0123639		929.56	0.015121		929.56	0.0193113		929.56	0.0174369
931.489	0.0298208		931.489	0.0124269		931.489	0.0150387		931.489	0.0191119		931.489	0.0172816
933.417	0.0296301		933.417	0.0125814		933.417	0.0150502		933.417	0.0190051		933.417	0.0171568
935.346	0.0293945		935.346	0.0127545		935.346	0.0150577		935.346	0.0188834		935.346	0.0170465
937.274	0.0292373		937.274	0.0129565		937.274	0.0150838		937.274	0.0187785		937.274	0.0169705
939.203	0.0291489		939.203	0.0131877		939.203	0.0151497		939.203	0.0186572		939.203	0.0169478
941.131	0.0291367		941.131	0.0134749		941.131	0.0152562		941.131	0.0186069		941.131	0.0169846
943.06	0.0291181		943.06	0.0138255		943.06	0.0153376		943.06	0.0186207		943.06	0.0170518
944.989	0.0291332		944.989	0.0142692		944.989	0.01554		944.989	0.0186597		944.989	0.0171833
946.917	0.0291651		946.917	0.0147767		946.917	0.0158606		946.917	0.0187069		946.917	0.0173493
948.846	0.0293459		948.846	0.0153627		948.846	0.0162925		948.846	0.0187349		948.846	0.0175819
950.774	0.0295766		950.774	0.0159658		950.774	0.0167217		950.774	0.0187375		950.774	0.0178283
952.703	0.0298114		952.703	0.0164762		952.703	0.0171093		952.703	0.0188721		952.703	0.0180969
954.631	0.029958		954.631	0.0168239		954.631	0.0174574		954.631	0.0190655		954.631	0.0183011
956.56	0.0300516		956.56	0.0170905		956.56	0.0177576		956.56	0.0192496		956.56	0.0184039
958.488	0.0301003		958.488	0.0172938		958.488	0.0179145		958.488	0.0194232		958.488	0.0184638
960.417	0.0301354		960.417	0.0174209		960.417	0.0179051		960.417	0.0196589		960.417	0.0185075
962.346	0.0300148		962.346	0.0175151		962.346	0.017805		962.346	0.0198691		962.346	0.018428
964.274	0.0299128		964.274	0.0176264		964.274	0.0177808		964.274	0.0200773		964.274	0.0183166
966.202	0.0298019		966.202	0.0177055		966.202	0.0177143		966.202	0.0202331		966.202	0.0182
968.131	0.029687		968.131	0.0177457		968.131	0.0176291		968.131	0.0203998		968.131	0.0181333
970.06	0.0295315		970.06	0.0177715		970.06	0.0175893		970.06	0.0205659		970.06	0.0180744
971.988	0.0293904		971.988	0.0179176		971.988	0.0176272		971.988	0.0207283		971.988	0.0179813
973.917	0.0293069		973.917	0.0180708		973.917	0.0176785		973.917	0.0207946		973.917	0.017932
975.845	0.0293359		975.845	0.0182629		975.845	0.0178048		975.845	0.0208331		975.845	0.0179995
977.774	0.0294156		977.774	0.0185451		977.774	0.0180671		977.774	0.0208474		977.774	0.018107
979.702	0.0296089		979.702	0.0189554		979.702	0.0184444		979.702	0.0208917		979.702	0.0183036
981.631	0.0298285		981.631	0.0195028		981.631	0.0188498		981.631	0.0209382		981.631	0.0186052
983.559	0.0301556		983.559	0.0202331		983.559	0.0193713		983.559	0.0210657		983.559	0.0189751
985.488	0.0304817		985.488	0.0210377		985.488	0.0199905		985.488	0.0212259		985.488	0.0192705
987.417	0.0308431		987.417	0.0218441		987.417	0.020574		987.417	0.0214017		987.417	0.0195674
989.345	0.0312216		989.345	0.0225759		989.345	0.0210432		989.345	0.0216043		989.345	0.0198659
991.274	0.0315624		991.274	0.0232288		991.274	0.0214579		991.274	0.0218285		991.274	0.0201134
993.202	0.0318003		993.202	0.0237818		993.202	0.0218234		993.202	0.0220565		993.202	0.0202921
995.131	0.0320007		995.131	0.0243149		995.131	0.0222266		995.131	0.0223378		995.131	0.0204292
997.059	0.0321693		997.059	0.0247969		997.059	0.0226398		997.059	0.0226236		997.059	0.0205386
998.988	0.0325553		998.988	0.0254007		998.988	0.0231572		998.988	0.0229782		998.988	0.0208235
1000.92	0.0332033		1000.92	0.0262651		1000.92	0.0238865		1000.92	0.0233589		1000.92	0.0213444
1002.85	0.0339891		1002.85	0.0273138		1002.85	0.0248023		1002.85	0.0238208		1002.85	0.0219902
1004.77	0.0346631		1004.77	0.0284001		1004.77	0.0256623		1004.77	0.0243595		1004.77	0.0225618
1006.7	0.0353354		1006.7	0.029486		1006.7	0.0264024		1006.7	0.0250508		1006.7	0.0230772
1008.63	0.0359341		1008.63	0.0304565		1008.63	0.0270067		1008.63	0.0258008		1008.63	0.0235046
1010.56	0.0364419		1010.56	0.0313346		1010.56	0.0275264		1010.56	0.026609		1010.56	0.0238351
1012.49	0.0368339		1012.49	0.0320662		1012.49	0.0279573		1012.49	0.0274174		1012.49	0.0240894
1014.42	0.0371802		1014.42	0.0327354		1014.42	0.0283716		1014.42	0.0282021		1014.42	0.0243424
1016.35	0.0374991		1016.35	0.0333362		1016.35	0.0287422		1016.35	0.0288446		1016.35	0.0245513
1018.27	0.0378796		1018.27	0.0339877		1018.27	0.0291848		1018.27	0.029399		1018.27	0.0247709
1020.2	0.0382657		1020.2	0.0346245		1020.2	0.0296456		1020.2	0.029742		1020.2	0.0250134
1022.13	0.0387344		1022.13	0.0353552		1022.13	0.0301666		1022.13	0.0299338		1022.13	0.0253284
1024.06	0.0391474		1024.06	0.036084		1024.06	0.0307015		1024.06	0.0300379		1024.06	0.0256094
1025.99	0.039611		1025.99	0.0367277		1025.99	0.0312124		1025.99	0.0301699		1025.99	0.0259296
1027.92	0.0400692		1027.92	0.0372038		1027.92	0.0316119		1027.92	0.0303318		1027.92	0.0262368
1029.85	0.0404723		1029.85	0.0376419		1029.85	0.0320027		1029.85	0.0305084		1029.85	0.0264573
1031.77	0.0408162		1031.77	0.0380263		1031.77	0.032309		1031.77	0.0306064		1031.77	0.0265669
1033.7	0.041162		1033.7	0.0384085		1033.7	0.0325806		1033.7	0.0307145		1033.7	0.0267047
1035.63	0.0413703		1035.63	0.0385917		1035.63	0.0327201		1035.63	0.0307953		1035.63	0.0268958
1037.56	0.041432		1037.56	0.0385972		1037.56	0.0326101		1037.56	0.0309077		1037.56	0.026905
1039.49	0.0412315		1039.49	0.0383901		1039.49	0.0322954		1039.49	0.030959		1039.49	0.0266682
1041.42	0.0410616		1041.42	0.0381941		1041.42	0.0320321		1041.42	0.03105		1041.42	0.0264248
1043.34	0.0410213		1043.34	0.0381362		1043.34	0.0318116		1043.34	0.0311484		1043.34	0.0262953
1045.27	0.0409793		1045.27	0.0381265		1045.27	0.0317247		1045.27	0.0312772		1045.27	0.0262644
1047.2	0.0409063		1047.2	0.0379924		1047.2	0.0316936		1047.2	0.0314329		1047.2	0.026218
1049.13	0.0409457		1049.13	0.0379538		1049.13	0.0316099		1049.13	0.031612		1049.13	0.0261956
1051.06	0.0409167		1051.06	0.0380243		1051.06	0.0315049		1051.06	0.0315671		1051.06	0.0261848
1052.99	0.0408834		1052.99	0.0381527		1052.99	0.0314617		1052.99	0.0313898		1052.99	0.0262316
1054.92	0.0407547		1054.92	0.0382976		1054.92	0.0313207		1054.92	0.0311054		1054.92	0.0262094
1056.84	0.040666		1056.84	0.0385251		1056.84	0.031188		1056.84	0.030879		1056.84	0.0261382
1058.77	0.0406373		1058.77	0.0387184		1058.77	0.0311769		1058.77	0.030667		1058.77	0.0261004
1060.7	0.0406956		1060.7	0.0388797		1060.7	0.0312228		1060.7	0.0303549		1060.7	0.0261105
1062.63	0.0406882		1062.63	0.0388979		1062.63	0.0311893		1062.63	0.0298655		1062.63	0.0260384
1064.56	0.040674		1064.56	0.0389136		1064.56	0.0311504		1064.56	0.0293995		1064.56	0.0259075
1066.49	0.0406111		1066.49	0.0388537		1066.49	0.0310762		1066.49	0.0290814		1066.49	0.0257586
1068.42	0.040557		1068.42	0.0387722		1068.42	0.0309709		1068.42	0.0290315		1068.42	0.0256141
1070.34	0.040386		1070.34	0.0385289		1070.34	0.0307526		1070.34	0.0290018		1070.34	0.0253956
1072.27	0.0401447		1072.27	0.0381362		1072.27	0.0304236		1072.27	0.0289228		1072.27	0.0250959
1074.2	0.0398163		1074.2	0.0375884		1074.2	0.0299734		1074.2	0.0287886		1074.2	0.0247686
1076.13	0.0394673		1076.13	0.0369604		1076.13	0.029465		1076.13	0.028667		1076.13	0.0244486
1078.06	0.0389978		1078.06	0.0361961		1078.06	0.0288618		1078.06	0.0284696		1078.06	0.0241021
1079.99	0.0385769		1079.99	0.0354262		1079.99	0.0282771		1079.99	0.0282346		1079.99	0.0237666
1081.91	0.0381528		1081.91	0.0346886		1081.91	0.0277265		1081.91	0.0279429		1081.91	0.0234813
1083.84	0.0378242		1083.84	0.0340987		1083.84	0.0273358		1083.84	0.0276678		1083.84	0.0233022
1085.77	0.0375694		1085.77	0.0336216		1085.77	0.0270921		1085.77	0.0274186		1085.77	0.023255
1087.7	0.0374667		1087.7	0.0333379		1087.7	0.026988		1087.7	0.0272794		1087.7	0.0233483
1089.63	0.0374904		1089.63	0.0331761		1089.63	0.0270016		1089.63	0.0271849		1089.63	0.0235404
1091.56	0.0376378		1091.56	0.0331399		1091.56	0.0271435		1091.56	0.027168		1091.56	0.0238243
1093.49	0.0377273		1093.49	0.0331096		1093.49	0.0272742		1093.49	0.0271947		1093.49	0.0240659
1095.41	0.0377878		1095.41	0.0330578		1095.41	0.0273638		1095.41	0.0272795		1095.41	0.024251
1097.34	0.0377301		1097.34	0.0328862		1097.34	0.0273646		1097.34	0.0273075		1097.34	0.0243456
1099.27	0.0375935		1099.27	0.0326818		1099.27	0.0273177		1099.27	0.0273548		1099.27	0.024345
1101.2	0.0374068		1101.2	0.0324614		1101.2	0.0272054		1101.2	0.0273506		1101.2	0.0242796
1103.13	0.0371946		1103.13	0.0321453		1103.13	0.0271146		1103.13	0.0273538		1103.13	0.0241875
1105.06	0.0368116		1105.06	0.0316947		1105.06	0.0268744		1105.06	0.0272866		1105.06	0.0239677
1106.99	0.0363452		1106.99	0.0312095		1106.99	0.0264347		1106.99	0.0270669		1106.99	0.023639
1108.91	0.0357026		1108.91	0.0305201		1108.91	0.02577		1108.91	0.0266278		1108.91	0.0231599
1110.84	0.0349151		1110.84	0.0296466		1110.84	0.0249545		1110.84	0.02614		1110.84	0.0225363
1112.77	0.0340089		1112.77	0.0286379		1112.77	0.0240767		1112.77	0.0255487		1112.77	0.0217947
1114.7	0.0331137		1114.7	0.0276344		1114.7	0.0231672		1114.7	0.0247766		1114.7	0.0210388
1116.63	0.0321993		1116.63	0.0266038		1116.63	0.0221848		1116.63	0.023891		1116.63	0.0203422
1118.56	0.0313783		1118.56	0.0256738		1118.56	0.021315		1118.56	0.0230821		1118.56	0.0197309
1120.49	0.0307043		1120.49	0.0248876		1120.49	0.0206447		1120.49	0.0222822		1120.49	0.0192514
1122.41	0.0302522		1122.41	0.024191		1122.41	0.0201242		1122.41	0.0215598		1122.41	0.0189736
1124.34	0.0299312		1124.34	0.023623		1124.34	0.0196599		1124.34	0.0209028		1124.34	0.0187961
1126.27	0.029699		1126.27	0.0231853		1126.27	0.0192999		1126.27	0.0203818		1126.27	0.0186508
1128.2	0.0295121		1128.2	0.0227908		1128.2	0.019014		1128.2	0.0199368		1128.2	0.0185761
1130.13	0.0294854		1130.13	0.022507		1130.13	0.0188037		1130.13	0.0195845		1130.13	0.0186208
1132.06	0.0295511		1132.06	0.0223015		1132.06	0.0186587		1132.06	0.0193883		1132.06	0.0187102
1133.99	0.0296899		1133.99	0.0222123		1133.99	0.0186227		1133.99	0.0193138		1133.99	0.0188259
1135.91	0.0298549		1135.91	0.0221768		1135.91	0.0186731		1135.91	0.0192677		1135.91	0.0189831
1137.84	0.0301091		1137.84	0.0221593		1137.84	0.0188223		1137.84	0.0192832		1137.84	0.019215
1139.77	0.0303968		1139.77	0.0221973		1139.77	0.0189925		1139.77	0.0193331		1139.77	0.0194761
1141.7	0.0307553		1141.7	0.022308		1141.7	0.01921		1141.7	0.0194868		1141.7	0.019761
1143.63	0.0310684		1143.63	0.0223008		1143.63	0.0194053		1143.63	0.0196791		1143.63	0.0200552
1145.56	0.0313096		1145.56	0.0221733		1145.56	0.0195168		1145.56	0.0198291		1145.56	0.0202936
1147.49	0.0313313		1147.49	0.0219226		1147.49	0.0195179		1147.49	0.0198757		1147.49	0.020325
1149.41	0.0311898		1149.41	0.0216217		1149.41	0.0194214		1149.41	0.0199013		1149.41	0.0201956
1151.34	0.0310116		1151.34	0.0212939		1151.34	0.0192514		1151.34	0.0198432		1151.34	0.0200329
1153.27	0.0308737		1153.27	0.0209624		1153.27	0.0191198		1153.27	0.0197306		1153.27	0.0199508
1155.2	0.0307451		1155.2	0.0206258		1155.2	0.0190097		1155.2	0.0195923		1155.2	0.0199416
1157.13	0.0307004		1157.13	0.0203255		1157.13	0.0189481		1157.13	0.0195034		1157.13	0.0199848
1159.06	0.0306626		1159.06	0.0200205		1159.06	0.0188555		1159.06	0.0194215		1159.06	0.0200115
1160.99	0.0305746		1160.99	0.0196989		1160.99	0.0186885		1160.99	0.0193098		1160.99	0.0199844
1162.91	0.0302959		1162.91	0.0192302		1162.91	0.0183477		1162.91	0.0190885		1162.91	0.0198053
1164.84	0.0298717		1164.84	0.0186288		1164.84	0.0178228		1164.84	0.0187703		1164.84	0.0195214
1166.77	0.0293265		1166.77	0.0179001		1166.77	0.0171763		1166.77	0.0183364		1166.77	0.0191173
1168.7	0.0287164		1168.7	0.0171261		1168.7	0.0164871		1168.7	0.0178991		1168.7	0.0186035
1170.63	0.0280561		1170.63	0.016347		1170.63	0.0157807		1170.63	0.0174771		1170.63	0.0180591
1172.56	0.027484		1172.56	0.0155594		1172.56	0.0151024		1172.56	0.0170465		1172.56	0.0175607
1174.49	0.0269358		1174.49	0.014809		1174.49	0.0144812		1174.49	0.0165922		1174.49	0.0171208
1176.41	0.0264295		1176.41	0.0141616		1176.41	0.013974		1176.41	0.0161899		1176.41	0.0167469
1178.34	0.0258929		1178.34	0.01356		1178.34	0.013474		1178.34	0.0158549		1178.34	0.0163723
1180.27	0.0254186		1180.27	0.0130459		1180.27	0.0130322		1180.27	0.0155798		1180.27	0.0160112
1182.2	0.0249868		1182.2	0.0126195		1182.2	0.0126691		1182.2	0.0153486		1182.2	0.0156357
1184.13	0.0246185		1184.13	0.0123283		1184.13	0.0123573		1184.13	0.0151825		1184.13	0.0152822
1186.06	0.0243076		1186.06	0.0121197		1186.06	0.01209		1186.06	0.0150333		1186.06	0.0149831
1187.99	0.0240711		1187.99	0.0120431		1187.99	0.0119766		1187.99	0.0149277		1187.99	0.0147726
1189.91	0.0238456		1189.91	0.0120714		1189.91	0.011936		1189.91	0.0148384		1189.91	0.0145875
1191.84	0.0236513		1191.84	0.0120937		1191.84	0.0118888		1191.84	0.014796		1191.84	0.0143885
1193.77	0.0234804		1193.77	0.0120931		1193.77	0.011812		1193.77	0.0147869		1193.77	0.0142165
1195.7	0.0233835		1195.7	0.012147		1195.7	0.0117319		1195.7	0.0148121		1195.7	0.0140952
1197.63	0.0232912		1197.63	0.0122624		1197.63	0.0116549		1197.63	0.0148558		1197.63	0.0139878
1199.56	0.0232708		1199.56	0.0124519		1199.56	0.0116281		1199.56	0.0149517		1199.56	0.0139106
1201.48	0.0232684		1201.48	0.0126218		1201.48	0.0116349		1201.48	0.0150262		1201.48	0.0138411
1203.41	0.0232442		1203.41	0.0127388		1203.41	0.0116523		1203.41	0.0151303		1203.41	0.0137802
1205.34	0.0231502		1205.34	0.012803		1205.34	0.011661		1205.34	0.0152271		1205.34	0.0137147
1207.27	0.0230413		1207.27	0.0128637		1207.27	0.0116778		1207.27	0.0153241		1207.27	0.0136301
1209.2	0.022939		1209.2	0.0128854		1209.2	0.0116403		1209.2	0.0154342		1209.2	0.0135272
1211.13	0.0228817		1211.13	0.0128843		1211.13	0.0115557		1211.13	0.0156133		1211.13	0.013448
1213.06	0.0228298		1213.06	0.0129091		1213.06	0.0114953		1213.06	0.0157998		1213.06	0.0134323
1214.98	0.0228765		1214.98	0.0130286		1214.98	0.0115177		1214.98	0.0160193		1214.98	0.0135055
1216.91	0.0229422		1216.91	0.0131863		1216.91	0.011623		1216.91	0.016301		1216.91	0.0135874
1218.84	0.0230953		1218.84	0.0134239		1218.84	0.0118256		1218.84	0.0167083		1218.84	0.0136884
1220.77	0.023299		1220.77	0.0137109		1220.77	0.0120655		1220.77	0.0171517		1220.77	0.0138634
1222.7	0.0235378		1222.7	0.0140629		1222.7	0.0123207		1222.7	0.0176405		1222.7	0.0140804
1224.63	0.0237726		1224.63	0.0144223		1224.63	0.012581		1224.63	0.018209		1224.63	0.0142805
1226.56	0.0240752		1226.56	0.0147688		1226.56	0.0128806		1226.56	0.0188055		1226.56	0.0145174
1228.48	0.0243725		1228.48	0.0151131		1228.48	0.013178		1228.48	0.0193687		1228.48	0.0147801
1230.41	0.0246551		1230.41	0.0154976		1230.41	0.0134435		1230.41	0.0198898		1230.41	0.0150105
1232.34	0.024922		1232.34	0.0158336		1232.34	0.0136709		1232.34	0.020339		1232.34	0.0152107
1234.27	0.025184		1234.27	0.0160976		1234.27	0.0139036		1234.27	0.0207884		1234.27	0.015384
1236.2	0.0254259		1236.2	0.0162955		1236.2	0.0141289		1236.2	0.0211343		1236.2	0.0155594
1238.13	0.0256689		1238.13	0.0165112		1238.13	0.0143433		1238.13	0.0213649		1238.13	0.0157385
1240.06	0.0258459		1240.06	0.0167134		1240.06	0.0145353		1240.06	0.0214723		1240.06	0.0158712
1241.98	0.0260195		1241.98	0.0168195		1241.98	0.0147022		1241.98	0.0214678		1241.98	0.0159669
1243.91	0.026133		1243.91	0.0168371		1243.91	0.0148082		1243.91	0.0213524		1243.91	0.0159941
1245.84	0.0262455		1245.84	0.0168516		1245.84	0.014875		1245.84	0.0211405		1245.84	0.0160157
1247.77	0.02628		1247.77	0.0167682		1247.77	0.014846		1247.77	0.020786		1247.77	0.0160006
1249.7	0.0262157		1249.7	0.0166494		1249.7	0.0147664		1249.7	0.0203872		1249.7	0.0159191
1251.63	0.0260766		1251.63	0.0165255		1251.63	0.0146957		1251.63	0.0200093		1251.63	0.0157745
1253.56	0.0260094		1253.56	0.0164033		1253.56	0.014629		1253.56	0.0196877		1253.56	0.0156541
1255.48	0.0259184		1255.48	0.0162595		1255.48	0.0145253		1255.48	0.0193868		1255.48	0.0155248
1257.41	0.0257927		1257.41	0.0160884		1257.41	0.0143852		1257.41	0.0191174		1257.41	0.0153561
1259.34	0.0255931		1259.34	0.0158381		1259.34	0.0142082		1259.34	0.0188672		1259.34	0.0151423
1261.27	0.0254		1261.27	0.0155911		1261.27	0.0140445		1261.27	0.0186332		1261.27	0.0149834
1263.2	0.0251849		1263.2	0.0154027		1263.2	0.013844		1263.2	0.0184023		1263.2	0.0148278
1265.13	0.0249483		1265.13	0.0152498		1265.13	0.0136205		1265.13	0.0181989		1265.13	0.0145614
1267.06	0.0246854		1267.06	0.0150718		1267.06	0.0133816		1267.06	0.0179778		1267.06	0.0142978
1268.98	0.0244781		1268.98	0.0148992		1268.98	0.0131696		1268.98	0.0177331		1268.98	0.0141055
1270.91	0.0242638		1270.91	0.0147116		1270.91	0.013009		1270.91	0.0174812		1270.91	0.0139129
1272.84	0.0241		1272.84	0.0145722		1272.84	0.0128898		1272.84	0.0173152		1272.84	0.0138172
1274.77	0.0239461		1274.77	0.0144197		1274.77	0.0127371		1274.77	0.0171707		1274.77	0.0137695
1276.7	0.0237977		1276.7	0.0142565		1276.7	0.0125904		1276.7	0.0169875		1276.7	0.0136589
1278.63	0.0236301		1278.63	0.014107		1278.63	0.0124537		1278.63	0.0167712		1278.63	0.0135331
1280.56	0.0234363		1280.56	0.0139647		1280.56	0.0123224		1280.56	0.0165718		1280.56	0.0133928
1282.48	0.023192		1282.48	0.0137847		1282.48	0.0121801		1282.48	0.0163802		1282.48	0.0132441
1284.41	0.0229377		1284.41	0.0136406		1284.41	0.0120327		1284.41	0.0161664		1284.41	0.0130269
1286.34	0.022639		1286.34	0.0135175		1286.34	0.0118537		1286.34	0.0159036		1286.34	0.0127582
1288.27	0.0224094		1288.27	0.0134364		1288.27	0.0116858		1288.27	0.0157277		1288.27	0.0125751
1290.2	0.0222471		1290.2	0.0134281		1290.2	0.0115806		1290.2	0.0156355		1290.2	0.01251
1292.13	0.022113		1292.13	0.0134821		1292.13	0.0115275		1292.13	0.0155222		1292.13	0.0124529
1294.06	0.0219949		1294.06	0.0135678		1294.06	0.0114974		1294.06	0.015419		1294.06	0.0123989
1295.98	0.0220001		1295.98	0.0136544		1295.98	0.0114948		1295.98	0.0154075		1295.98	0.0123697
1297.91	0.0220607		1297.91	0.0137583		1297.91	0.011512		1297.91	0.0154228		1297.91	0.0124122
1299.84	0.0221072		1299.84	0.013887		1299.84	0.0115762		1299.84	0.0154488		1299.84	0.0124449
1301.77	0.0221271		1301.77	0.0140366		1301.77	0.0116354		1301.77	0.0155105		1301.77	0.0124598
1303.7	0.0221907		1303.7	0.0141972		1303.7	0.0116915		1303.7	0.0155812		1303.7	0.0125236
1305.63	0.0222203		1305.63	0.0143144		1305.63	0.011764		1305.63	0.0156094		1305.63	0.0125685
1307.56	0.022218		1307.56	0.0144442		1307.56	0.0118428		1307.56	0.015664		1307.56	0.0125554
1309.48	0.022238		1309.48	0.0145709		1309.48	0.011927		1309.48	0.015748		1309.48	0.0126388
1311.41	0.0222466		1311.41	0.0146622		1311.41	0.0119788		1311.41	0.0157934		1311.41	0.0126214
1313.34	0.0222396		1313.34	0.0147554		1313.34	0.0120561		1313.34	0.0157863		1313.34	0.0125598
1315.27	0.0223405		1315.27	0.0149018		1315.27	0.012212		1315.27	0.0158266		1315.27	0.0126856
1317.2	0.0223645		1317.2	0.0149192		1317.2	0.0122359		1317.2	0.0158245		1317.2	0.0126582
1319.13	0.0223716		1319.13	0.0149361		1319.13	0.0122394		1319.13	0.0158032		1319.13	0.0126123
1321.06	0.0224138		1321.06	0.0150125		1321.06	0.012332		1321.06	0.0157983		1321.06	0.0128256
1322.98	0.0224386		1322.98	0.0150209		1322.98	0.0123799		1322.98	0.0157759		1322.98	0.0129972
1324.91	0.0224078		1324.91	0.0149727		1324.91	0.012365		1324.91	0.0157666		1324.91	0.0130229
1326.84	0.0223755		1326.84	0.0149781		1326.84	0.0123421		1326.84	0.0157741		1326.84	0.0129906
1328.77	0.0223486		1328.77	0.0150157		1328.77	0.0123357		1328.77	0.0157748		1328.77	0.012957
1330.7	0.0223684		1330.7	0.0150704		1330.7	0.0123552		1330.7	0.0158015		1330.7	0.0129772
1332.63	0.02235		1332.63	0.0150981		1332.63	0.0123535		1332.63	0.0157825		1332.63	0.0129928
1334.56	0.0223237		1334.56	0.0151076		1334.56	0.0123145		1334.56	0.0156753		1334.56	0.0128531
1336.48	0.022187		1336.48	0.0149551		1336.48	0.0121037		1336.48	0.0154347		1336.48	0.012414
1338.41	0.0219783		1338.41	0.0147101		1338.41	0.0117428		1338.41	0.0151465		1338.41	0.0117337
1340.34	0.0220146		1340.34	0.0147432		1340.34	0.0116492		1340.34	0.0150402		1340.34	0.0117129
1342.27	0.0223368		1342.27	0.0150866		1342.27	0.0119175		1342.27	0.0151622		1342.27	0.0124855
1344.2	0.0224713		1344.2	0.0152253		1344.2	0.0119856		1344.2	0.0151805		1344.2	0.0128091
1346.13	0.0225567		1346.13	0.0152884		1346.13	0.0119551		1346.13	0.0151851		1346.13	0.0128369
1348.06	0.0226188		1348.06	0.015376		1348.06	0.0119296		1348.06	0.0152309		1348.06	0.0127881
1349.98	0.022795		1349.98	0.0155526		1349.98	0.0119917		1349.98	0.0153313		1349.98	0.0128338
1351.91	0.0230301		1351.91	0.0158027		1351.91	0.0121507		1351.91	0.0154155		1351.91	0.0130142
1353.84	0.0232355		1353.84	0.0160311		1353.84	0.0122702		1353.84	0.0154859		1353.84	0.0130388
1355.77	0.0234474		1355.77	0.0162698		1355.77	0.0124423		1355.77	0.0156029		1355.77	0.0131146
1357.7	0.0236873		1357.7	0.0165374		1357.7	0.0126646		1357.7	0.015793		1357.7	0.0132774
1359.63	0.0237917		1359.63	0.0166262		1359.63	0.0127043		1359.63	0.0159675		1359.63	0.0131208
1361.56	0.0238154		1361.56	0.0165081		1361.56	0.0125961		1361.56	0.0161155		1361.56	0.0125679
1363.48	0.024158		1363.48	0.0166498		1363.48	0.0127998		1363.48	0.0164607		1363.48	0.012757
1365.41	0.024691		1365.41	0.0171594		1365.41	0.013311		1365.41	0.0169133		1365.41	0.0136131
1367.34	0.0248648		1367.34	0.0174072		1367.34	0.0135069		1367.34	0.0170727		1367.34	0.0137284
1369.27	0.0250525		1369.27	0.0175846		1369.27	0.013627		1369.27	0.0171114		1369.27	0.0137102
1371.2	0.0252821		1371.2	0.0177839		1371.2	0.0138011		1371.2	0.0170841		1371.2	0.0137996
1373.13	0.0252843		1373.13	0.0177334		1373.13	0.0136999		1373.13	0.0168796		1373.13	0.0132826
1375.06	0.0255046		1375.06	0.017889		1375.06	0.0137634		1375.06	0.016771		1375.06	0.0132002
1376.98	0.0261617		1376.98	0.0185155		1376.98	0.0142479		1376.98	0.0168661		1376.98	0.0140048
1378.91	0.0266162		1378.91	0.0189643		1378.91	0.0145254		1378.91	0.0167656		1378.91	0.014361
1380.84	0.0267935		1380.84	0.0191605		1380.84	0.0145617		1380.84	0.0166141		1380.84	0.0143902
1382.77	0.0267221		1382.77	0.0191837		1382.77	0.0144464		1382.77	0.0164994		1382.77	0.0141851
1384.7	0.0265104		1384.7	0.019132		1384.7	0.0141895		1384.7	0.0163228		1384.7	0.0136136
1386.63	0.0261753		1386.63	0.0189233		1386.63	0.0137456		1386.63	0.0159599		1386.63	0.0126275
1388.56	0.0262464		1388.56	0.0189194		1388.56	0.0135758		1388.56	0.0157224		1388.56	0.0125118
1390.48	0.0264277		1390.48	0.0190491		1390.48	0.0135748		1390.48	0.0156855		1390.48	0.0128497
1392.41	0.0263305		1392.41	0.0189727		1392.41	0.0133482		1392.41	0.0155828		1392.41	0.0125164
1394.34	0.0259908		1394.34	0.0186592		1394.34	0.012893		1394.34	0.0153565		1394.34	0.0115307
1396.27	0.02587		1396.27	0.018688		1396.27	0.0127445		1396.27	0.01537		1396.27	0.0111352
1398.2	0.0258648		1398.2	0.0189305		1398.2	0.012833		1398.2	0.0155098		1398.2	0.0111773
1400.13	0.0260835		1400.13	0.0193423		1400.13	0.0131285		1400.13	0.0157258		1400.13	0.0116823
1402.05	0.0263638		1402.05	0.019764		1402.05	0.0134831		1402.05	0.0158935		1402.05	0.0122891
1403.98	0.0263963		1403.98	0.0198719		1403.98	0.0135113		1403.98	0.015886		1403.98	0.0120499
1405.91	0.0265993		1405.91	0.0201033		1405.91	0.0136748		1405.91	0.0159242		1405.91	0.0121724
1407.84	0.0269951		1407.84	0.0204915		1407.84	0.0140435		1407.84	0.0160457		1407.84	0.0127444
1409.77	0.0272821		1409.77	0.0206956		1409.77	0.014276		1409.77	0.0160708		1409.77	0.0128977
1411.7	0.0276657		1411.7	0.0208628		1411.7	0.0145169		1411.7	0.0161378		1411.7	0.0130979
1413.63	0.0280769		1413.63	0.0210333		1413.63	0.0147939		1413.63	0.0161971		1413.63	0.0134585
1415.55	0.0281926		1415.55	0.0209463		1415.55	0.0148147		1415.55	0.0161082		1415.55	0.0132437
1417.48	0.0278956		1417.48	0.0205029		1417.48	0.014455		1417.48	0.0158422		1417.48	0.0123036
1419.41	0.0277012		1419.41	0.0201153		1419.41	0.0142662		1419.41	0.0157273		1419.41	0.012015
1421.34	0.0278412		1421.34	0.0201984		1421.34	0.0145894		1421.34	0.0158179		1421.34	0.0128628
1423.27	0.0276369		1423.27	0.0199303		1423.27	0.0144911		1423.27	0.0156646		1423.27	0.0127637
1425.2	0.0274373		1425.2	0.0196208		1425.2	0.0143958		1425.2	0.015579		1425.2	0.0129376
1427.12	0.0273615		1427.12	0.0194604		1427.12	0.0144342		1427.12	0.0155931		1427.12	0.0132579
1429.05	0.0270082		1429.05	0.0189486		1429.05	0.0141211		1429.05	0.0154669		1429.05	0.0128199
1430.98	0.0267644		1430.98	0.0185301		1430.98	0.0139243		1430.98	0.0155254		1430.98	0.012747
1432.91	0.0266326		1432.91	0.0183288		1432.91	0.0138795		1432.91	0.0156435		1432.91	0.0129172
1434.84	0.026299		1434.84	0.0179485		1434.84	0.0135641		1434.84	0.0156586		1434.84	0.0124503
1436.77	0.0258358		1436.77	0.0173858		1436.77	0.0131387		1436.77	0.0157865		1436.77	0.0119066
1438.7	0.0259076		1438.7	0.0173432		1438.7	0.013394		1438.7	0.0162901		1438.7	0.012745
1440.62	0.0259478		1440.62	0.017335		1440.62	0.0135772		1440.62	0.0166744		1440.62	0.0133216
1442.55	0.0258602		1442.55	0.0171627		1442.55	0.0135519		1442.55	0.0169194		1442.55	0.0134865
1444.48	0.0256751		1444.48	0.0169122		1444.48	0.0134471		1444.48	0.0169326		1444.48	0.0134243
1446.41	0.0253841		1446.41	0.0165283		1446.41	0.0131602		1446.41	0.0166704		1446.41	0.0129786
1448.34	0.0251699		1448.34	0.0162199		1448.34	0.0129487		1448.34	0.0163563		1448.34	0.0127751
1450.27	0.0252329		1450.27	0.0162362		1450.27	0.0131056		1450.27	0.0163454		1450.27	0.013181
1452.2	0.0252533		1452.2	0.0161591		1452.2	0.0131748		1452.2	0.0163918		1452.2	0.0132593
1454.12	0.025141		1454.12	0.0158657		1454.12	0.0130215		1454.12	0.0163999		1454.12	0.0128145
1456.05	0.0244341		1456.05	0.0150144		1456.05	0.01228		1456.05	0.0160534		1456.05	0.0111207
1457.98	0.0237689		1457.98	0.0142629		1457.98	0.0116598		1457.98	0.0158273		1457.98	0.0102145
1459.91	0.0243929		1459.91	0.0149206		1459.91	0.0124695		1459.91	0.0163059		1459.91	0.0124069
1461.84	0.0248113		1461.84	0.0154153		1461.84	0.013035		1461.84	0.0166406		1461.84	0.0135872
1463.77	0.0246143		1463.77	0.0153088		1463.77	0.0130464		1463.77	0.0167272		1463.77	0.013244
1465.7	0.0241913		1465.7	0.0150055		1465.7	0.0130995		1465.7	0.0169457		1465.7	0.0129452
1467.62	0.0236719		1467.62	0.0148442		1467.62	0.0131031		1467.62	0.0168859		1467.62	0.0130942
1469.55	0.0226196		1469.55	0.0142849		1469.55	0.0124609		1469.55	0.0161894		1469.55	0.0121403
1471.48	0.0209123		1471.48	0.0130938		1471.48	0.0110228		1471.48	0.014894		1471.48	0.00967912
1473.41	0.0190733		1473.41	0.0117696		1473.41	0.00937088		1473.41	0.0133279		1473.41	0.00758907
1475.34	0.0184788		1475.34	0.0112842		1475.34	0.00895921		1475.34	0.0126734		1475.34	0.00790523
1477.27	0.0182347		1477.27	0.0109518		1477.27	0.00881359		1477.27	0.0122943		1477.27	0.008417
1479.2	0.0180314		1479.2	0.0107288		1479.2	0.00872416		1479.2	0.0120188		1479.2	0.00864164
1481.12	0.017696		1481.12	0.0103354		1481.12	0.00846785		1481.12	0.0116914		1481.12	0.00832472
1483.05	0.017523		1483.05	0.0100931		1483.05	0.00834566		1483.05	0.0115235		1483.05	0.00833029
1484.98	0.0172813		1484.98	0.0098289		1484.98	0.00811928		1484.98	0.0113602		1484.98	0.00798976
1486.91	0.0166709		1486.91	0.00924594		1486.91	0.00750684		1486.91	0.0110504		1486.91	0.00673018
1488.84	0.0159815		1488.84	0.00863438		1488.84	0.00681034		1488.84	0.0108208		1488.84	0.00524408
1490.77	0.0160932		1490.77	0.00879353		1490.77	0.00692574		1490.77	0.0110235		1490.77	0.00575508
1492.7	0.0167071		1492.7	0.00945682		1492.7	0.00755512		1492.7	0.0114253		1492.7	0.00729778
1494.62	0.0166922		1494.62	0.00953671		1494.62	0.00755563		1494.62	0.0115165		1494.62	0.00722002
1496.55	0.0163487		1496.55	0.00919412		1496.55	0.00713125		1496.55	0.0114325		1496.55	0.00613707
1498.48	0.0164388		1498.48	0.00919429		1498.48	0.00718424		1498.48	0.0115803		1498.48	0.00620429
1500.41	0.0168466		1500.41	0.00953051		1500.41	0.00756163		1500.41	0.0119484		1500.41	0.00700776
1502.34	0.01708		1502.34	0.00979758		1502.34	0.00775695		1502.34	0.0122138		1502.34	0.00736642
1504.27	0.0168997		1504.27	0.00970206		1504.27	0.00749016		1504.27	0.012242		1504.27	0.0066294
1506.2	0.0158684		1506.2	0.00864161		1506.2	0.0061899		1506.2	0.0117802		1506.2	0.0035773
1508.12	0.0161149		1508.12	0.008684		1508.12	0.00609251		1508.12	0.0122073		1508.12	0.00322986
1510.05	0.0173451		1510.05	0.0100239		1510.05	0.00737178		1510.05	0.0131268		1510.05	0.00598167
1511.98	0.0181142		1511.98	0.0109064		1511.98	0.00814038		1511.98	0.0137637		1511.98	0.00737188
1513.91	0.01835		1513.91	0.0112905		1513.91	0.00840464		1513.91	0.0140945		1513.91	0.00753553
1515.84	0.0181282		1515.84	0.0111164		1515.84	0.00809875		1515.84	0.0141135		1515.84	0.00642271
1517.77	0.018128		1517.77	0.0110951		1517.77	0.00798797		1517.77	0.0142535		1517.77	0.00602518
1519.7	0.0182705		1519.7	0.0112064		1519.7	0.00806213		1519.7	0.0143885		1519.7	0.00601272
1521.62	0.0180642		1521.62	0.0108451		1521.62	0.00759514		1521.62	0.0143202		1521.62	0.00493961
1523.55	0.0187832		1523.55	0.0115		1523.55	0.00809332		1523.55	0.0148201		1523.55	0.00610616
1525.48	0.0191985		1525.48	0.0119393		1525.48	0.00846535		1525.48	0.0151054		1525.48	0.00675495
1527.41	0.0197611		1527.41	0.0125208		1527.41	0.00889576		1527.41	0.0155926		1527.41	0.00740255
1529.34	0.0203958		1529.34	0.0132961		1529.34	0.00945689		1529.34	0.0161326		1529.34	0.00840001
1531.27	0.02071		1531.27	0.0136673		1531.27	0.00964253		1531.27	0.0163574		1531.27	0.00843379
1533.2	0.0207509		1533.2	0.0137301		1533.2	0.00944622		1533.2	0.0163904		1533.2	0.00751176
1535.12	0.0215886		1535.12	0.0146782		1535.12	0.0100141		1535.12	0.0169352		1535.12	0.00835464
1537.05	0.0218611		1537.05	0.0151773		1537.05	0.010217		1537.05	0.017183		1537.05	0.008477
1538.98	0.0213821		1538.98	0.0147793		1538.98	0.00944175		1538.98	0.016995		1538.98	0.00621498
1540.91	0.0215162		1540.91	0.014563		1540.91	0.00886945		1540.91	0.0170941		1540.91	0.00452913
1542.84	0.0229241		1542.84	0.0156871		1542.84	0.00990645		1542.84	0.0178025		1542.84	0.00653205
1544.77	0.0242036		1544.77	0.0166054		1544.77	0.0108707		1544.77	0.0183938		1544.77	0.00831877
1546.7	0.0255367		1546.7	0.0174744		1546.7	0.0119132		1546.7	0.0189938		1546.7	0.0102121
1548.62	0.0260773		1548.62	0.0176706		1548.62	0.0122002		1548.62	0.0191179		1548.62	0.0104426
1550.55	0.0267764		1550.55	0.0177135		1550.55	0.0123239		1550.55	0.019081		1550.55	0.010353
1552.48	0.0274366		1552.48	0.0178967		1552.48	0.0125909		1552.48	0.0190704		1552.48	0.0106398
1554.41	0.0278736		1554.41	0.0178294		1554.41	0.0125537		1554.41	0.0188681		1554.41	0.0100724
1556.34	0.0280458		1556.34	0.0176906		1556.34	0.0124017		1556.34	0.0185243		1556.34	0.00921683
1558.27	0.0277975		1558.27	0.01685		1558.27	0.0116966		1558.27	0.0177048		1558.27	0.00703843
1560.19	0.0296753		1560.19	0.0178251		1560.19	0.0127237		1560.19	0.0179865		1560.19	0.0090544
1562.12	0.0309346		1562.12	0.0192958		1562.12	0.013939		1562.12	0.0186718		1562.12	0.0114933
1564.05	0.0314542		1564.05	0.0198224		1564.05	0.0142989		1564.05	0.0187297		1564.05	0.0119269
1565.98	0.0321531		1565.98	0.0203614		1565.98	0.0146642		1565.98	0.0187577		1565.98	0.0122661
1567.91	0.0324662		1567.91	0.0206335		1567.91	0.0148349		1567.91	0.018704		1567.91	0.0121111
1569.84	0.0329839		1569.84	0.0210217		1569.84	0.0150047		1569.84	0.0186251		1569.84	0.0118821
1571.77	0.0340528		1571.77	0.022086		1571.77	0.0157439		1571.77	0.0189564		1571.77	0.0132549
1573.69	0.0345362		1573.69	0.022617		1573.69	0.0160634		1573.69	0.0191081		1573.69	0.0135454
1575.62	0.0347076		1575.62	0.0226887		1575.62	0.0159847		1575.62	0.0189983		1575.62	0.0127121
1577.55	0.0358862		1577.55	0.0235244		1577.55	0.0167298		1577.55	0.0193719		1577.55	0.0136956
1579.48	0.0369178		1579.48	0.0243841		1579.48	0.0176978		1579.48	0.0198945		1579.48	0.0153272
1581.41	0.0377263		1581.41	0.0249212		1581.41	0.0183755		1581.41	0.0202749		1581.41	0.0161652
1583.34	0.0384836		1583.34	0.0253492		1583.34	0.0189619		1583.34	0.0206344		1583.34	0.0167414
1585.27	0.0392837		1585.27	0.0258379		1585.27	0.019605		1585.27	0.0210235		1585.27	0.0172883
1587.19	0.0400286		1587.19	0.0263106		1587.19	0.0201838		1587.19	0.0213969		1587.19	0.0177607
1589.12	0.0408477		1589.12	0.0267826		1589.12	0.0207189		1589.12	0.0218066		1589.12	0.0182248
1591.05	0.041616		1591.05	0.0272352		1591.05	0.0211939		1591.05	0.0222777		1591.05	0.018781
1592.98	0.0423764		1592.98	0.0276776		1592.98	0.0216439		1592.98	0.0227628		1592.98	0.0193092
1594.91	0.0431157		1594.91	0.0280174		1594.91	0.0220574		1594.91	0.023257		1594.91	0.0197694
1596.84	0.0440089		1596.84	0.0284343		1596.84	0.0225789		1596.84	0.023868		1596.84	0.0205329
1598.77	0.0447828		1598.77	0.0287166		1598.77	0.0229899		1598.77	0.0244106		1598.77	0.0212411
1600.69	0.0454527		1600.69	0.02888		1600.69	0.023259		1600.69	0.0249222		1600.69	0.0216517
1602.62	0.0460407		1602.62	0.0289486		1602.62	0.0235008		1602.62	0.0255081		1602.62	0.0219945
1604.55	0.0468088		1604.55	0.0290543		1604.55	0.0238668		1604.55	0.0261889		1604.55	0.0226076
1606.48	0.0473882		1606.48	0.0289799		1606.48	0.0240413		1606.48	0.0267866		1606.48	0.0229844
1608.41	0.0479626		1608.41	0.0288273		1608.41	0.0241395		1608.41	0.0274761		1608.41	0.0231962
1610.34	0.0486709		1610.34	0.0288647		1610.34	0.0243991		1610.34	0.0283061		1610.34	0.0238622
1612.27	0.0494545		1612.27	0.0289881		1612.27	0.024755		1612.27	0.0292083		1612.27	0.024676
1614.19	0.0498535		1614.19	0.0287928		1614.19	0.0247963		1614.19	0.0298245		1614.19	0.0246996
1616.12	0.0501436		1616.12	0.0282502		1616.12	0.0245254		1616.12	0.0304429		1616.12	0.0240789
1618.05	0.0511556		1618.05	0.0282709		1618.05	0.0249691		1618.05	0.0316955		1618.05	0.0251341
1619.98	0.0520531		1619.98	0.0286596		1619.98	0.0256638		1619.98	0.0326854		1619.98	0.0263691
1621.91	0.0523943		1621.91	0.0285322		1621.91	0.0257528		1621.91	0.0332886		1621.91	0.0262338
1623.84	0.053065		1623.84	0.0284584		1623.84	0.0259991		1623.84	0.034295		1623.84	0.0265078
1625.77	0.0538297		1625.77	0.0287931		1625.77	0.0265885		1625.77	0.0353018		1625.77	0.02763
1627.69	0.0542961		1627.69	0.0288802		1627.69	0.0268905		1627.69	0.0361066		1627.69	0.0280721
1629.62	0.0548309		1629.62	0.0290756		1629.62	0.0273089		1629.62	0.0369107		1629.62	0.0289097
1631.55	0.0551092		1631.55	0.0291952		1631.55	0.0275738		1631.55	0.0374399		1631.55	0.0294052
1633.48	0.0547868		1633.48	0.0288853		1633.48	0.0273307		1633.48	0.0375364		1633.48	0.0287312
1635.41	0.0539206		1635.41	0.0278982		1635.41	0.026509		1635.41	0.0373312		1635.41	0.0269393
1637.34	0.0538285		1637.34	0.027675		1637.34	0.0265524		1637.34	0.037681		1637.34	0.0273969
1639.27	0.0541409		1639.27	0.0281357		1639.27	0.027098		1639.27	0.0380472		1639.27	0.0287714
1641.19	0.0539557		1641.19	0.0281458		1641.19	0.0271313		1641.19	0.0379734		1641.19	0.0291757
1643.12	0.0534117		1643.12	0.0278675		1643.12	0.0268492		1643.12	0.0376597		1643.12	0.0288517
1645.05	0.0523633		1645.05	0.0272006		1645.05	0.0261421		1645.05	0.0370738		1645.05	0.0273851
1646.98	0.0506828		1646.98	0.0259631		1646.98	0.0248517		1646.98	0.0360999		1646.98	0.0251093
1648.91	0.0502282		1648.91	0.0260771		1648.91	0.0248901		1648.91	0.0358032		1648.91	0.0259027
1650.84	0.0498816		1650.84	0.0261854		1650.84	0.0249298		1650.84	0.0355747		1650.84	0.026107
1652.77	0.0480938		1652.77	0.0249642		1652.77	0.0236085		1652.77	0.0343265		1652.77	0.0237496
1654.69	0.0466931		1654.69	0.0244779		1654.69	0.0230431		1654.69	0.0332455		1654.69	0.0238499
1656.62	0.0466283		1656.62	0.0249788		1656.62	0.023578		1656.62	0.0331615		1656.62	0.025355
1658.55	0.0458351		1658.55	0.0247089		1658.55	0.0233734		1658.55	0.0324817		1658.55	0.0254779
1660.48	0.0445635		1660.48	0.0239246		1660.48	0.0226289		1660.48	0.0314864		1660.48	0.024544
1662.41	0.0428853		1662.41	0.022739		1662.41	0.0215252		1662.41	0.0302128		1662.41	0.0230966
1664.34	0.0415427		1664.34	0.0219372		1664.34	0.0209179		1664.34	0.0290852		1664.34	0.022826
1666.27	0.0405168		1666.27	0.0213705		1666.27	0.0204764		1666.27	0.0282127		1666.27	0.0224454
1668.19	0.0389038		1668.19	0.0202338		1668.19	0.0193578		1668.19	0.0270068		1668.19	0.0205951
1670.12	0.0369154		1670.12	0.0188434		1670.12	0.0180589		1670.12	0.025479		1670.12	0.0188146
1672.05	0.0359892		1672.05	0.0184599		1672.05	0.0177634		1672.05	0.0246302		1672.05	0.0189831
1673.98	0.0350561		1673.98	0.0179809		1673.98	0.017314		1673.98	0.0238528		1673.98	0.0186566
1675.91	0.0335931		1675.91	0.0170985		1675.91	0.0164503		1675.91	0.0227691		1675.91	0.0179364
1677.84	0.0325682		1677.84	0.0165607		1677.84	0.0160272		1677.84	0.0219376		1677.84	0.0177028
1679.77	0.0313643		1679.77	0.0156897		1679.77	0.0153222		1679.77	0.0209522		1679.77	0.0166205
1681.69	0.0299974		1681.69	0.0146122		1681.69	0.0144306		1681.69	0.0198894		1681.69	0.0152101
1683.62	0.0282933		1683.62	0.0131077		1683.62	0.0131512		1683.62	0.0186247		1683.62	0.0130298
1685.55	0.0268378		1685.55	0.0118905		1685.55	0.0124466		1685.55	0.0174037		1685.55	0.0128989
1687.48	0.0265282		1687.48	0.0117705		1687.48	0.0125882		1687.48	0.0170664		1687.48	0.0136694
1689.41	0.0257167		1689.41	0.0110545		1689.41	0.0121909		1689.41	0.0163626		1689.41	0.0134695
1691.34	0.0249744		1691.34	0.0104341		1691.34	0.0118539		1691.34	0.0156699		1691.34	0.0135683
1693.27	0.0242575		1693.27	0.00985764		1693.27	0.0114852		1693.27	0.0150501		1693.27	0.0131296
1695.19	0.0230217		1695.19	0.00868146		1695.19	0.0105261		1695.19	0.0141567		1695.19	0.011307
1697.12	0.021696		1697.12	0.00730223		1697.12	0.00953678		1697.12	0.0131671		1697.12	0.00969312
1699.05	0.0211689		1699.05	0.0069189		1699.05	0.00931925		1699.05	0.0127506		1699.05	0.00944013
1700.98	0.0206295		1700.98	0.0063945		1700.98	0.00909984		1700.98	0.0122436		1700.98	0.00973547
1702.91	0.0206566		1702.91	0.00647692		1702.91	0.00929211		1702.91	0.0121223		1702.91	0.010535
1704.84	0.0203126		1704.84	0.0061861		1704.84	0.00908949		1704.84	0.0118005		1704.84	0.0101831
1706.77	0.0201422		1706.77	0.00611842		1706.77	0.00916782		1706.77	0.0116545		1706.77	0.0104827
1708.69	0.0203143		1708.69	0.00639843		1708.69	0.00955205		1708.69	0.0117405		1708.69	0.0114075
1710.62	0.0202915		1710.62	0.0064779		1710.62	0.00965995		1710.62	0.0117395		1710.62	0.0116966
1712.55	0.020057		1712.55	0.00637651		1712.55	0.00953485		1712.55	0.0116438		1712.55	0.011426
1714.48	0.0194821		1714.48	0.00590918		1714.48	0.00905068		1714.48	0.0113891		1714.48	0.0102013
1716.41	0.0189154		1716.41	0.00536923		1716.41	0.00851086		1716.41	0.0111976		1716.41	0.00899429
1718.34	0.0192449		1718.34	0.00553491		1718.34	0.00876838		1718.34	0.0115425		1718.34	0.00988635
1720.27	0.0201169		1720.27	0.00632625		1720.27	0.00962088		1720.27	0.0121055		1720.27	0.0120118
1722.19	0.0204817		1722.19	0.00667338		1722.19	0.009903		1722.19	0.0123796		1722.19	0.0127732
1724.12	0.0208055		1724.12	0.00678584		1724.12	0.0100197		1724.12	0.0126742		1724.12	0.0132653
1726.05	0.0213126		1726.05	0.00699042		1726.05	0.0102838		1726.05	0.0130617		1726.05	0.0140022
1727.98	0.0216835		1727.98	0.00702621		1727.98	0.0103609		1727.98	0.0133102		1727.98	0.014248
1729.91	0.0219573		1729.91	0.00684074		1729.91	0.0102366		1729.91	0.0135332		1729.91	0.0140443
1731.84	0.0222125		1731.84	0.00662839		1731.84	0.0101507		1731.84	0.0138205		1731.84	0.0138626
1733.77	0.0224095		1733.77	0.00621867		1733.77	0.00989161		1733.77	0.0140791		1733.77	0.0134194
1735.69	0.0234584		1735.69	0.00653148		1735.69	0.0105783		1735.69	0.0147735		1735.69	0.0150548
1737.62	0.0238533		1737.62	0.00678359		1737.62	0.011001		1737.62	0.015008		1737.62	0.0158137
1739.55	0.0236893		1739.55	0.0064023		1739.55	0.0107732		1739.55	0.0148962		1739.55	0.0154933
1741.48	0.023323		1741.48	0.00606946		1741.48	0.0104693		1741.48	0.0146921		1741.48	0.0152705
1743.41	0.0224605		1743.41	0.00558538		1743.41	0.00990818		1743.41	0.0142326		1743.41	0.0144674
1745.34	0.0211912		1745.34	0.00500828		1745.34	0.00918958		1745.34	0.0134915		1745.34	0.013418
1747.27	0.0194856		1747.27	0.0042619		1747.27	0.00818606		1747.27	0.0123607		1747.27	0.0116841
1749.19	0.0173281		1749.19	0.00346894		1749.19	0.00705002		1749.19	0.0109562		1749.19	0.00965222
1751.12	0.0152231		1751.12	0.00293991		1751.12	0.00621017		1751.12	0.00972283		1751.12	0.00849261
1753.05	0.0135436		1753.05	0.002837		1753.05	0.00571754		1753.05	0.00881541		1753.05	0.00798699
1754.98	0.0121595		1754.98	0.00263691		1754.98	0.00518291		1754.98	0.00804606		1754.98	0.00709272
1756.91	0.0104877		1756.91	0.00202097		1756.91	0.0043132		1756.91	0.00704248		1756.91	0.00553041
1758.84	0.00924062		1758.84	0.00162701		1758.84	0.00377362		1758.84	0.00625844		1758.84	0.00466325
1760.76	0.00828625		1760.76	0.00125624		1760.76	0.00330234		1760.76	0.00562455		1760.76	0.00378057
1762.69	0.0074129		1762.69	0.000865461		1762.69	0.00285281		1762.69	0.00496528		1762.69	0.00314958
1764.62	0.0071261		1764.62	0.000904307		1764.62	0.00285912		1764.62	0.00466412		1764.62	0.00335572
1766.55	0.00669394		1766.55	0.00069926		1766.55	0.00261261		1766.55	0.00427117		1766.55	0.00294417
1768.48	0.00614016		1768.48	0.000301691		1768.48	0.00216973		1768.48	0.00381857		1768.48	0.00215001
1770.41	0.00558619		1770.41	-0.000114198		1770.41	0.00171023		1770.41	0.00338675		1770.41	0.00117972
1772.34	0.00510489		1772.34	-0.000563278		1772.34	0.00126883		1772.34	0.00301077		1772.34	0.000262401
1774.26	0.00521655		1774.26	-0.000316017		1774.26	0.00153735		1774.26	0.00309899		1774.26	0.00106142
1776.19	0.00537392		1776.19	4.02266e-05		1776.19	0.00181516		1776.19	0.0031844		1776.19	0.00178611
1778.12	0.00530888		1778.12	0.000120658		1778.12	0.00184557		1778.12	0.00309669		1778.12	0.00192234
1780.05	0.00507962		1780.05	-6.75219e-05		1780.05	0.00164723		1780.05	0.00294631		1780.05	0.00153689
1781.98	0.00498831		1781.98	-9.04465e-05		1781.98	0.00162774		1781.98	0.00291786		1781.98	0.00164294
1783.91	0.00497755		1783.91	-2.38558e-05		1783.91	0.00170148		1783.91	0.0028927		1783.91	0.00180591
1785.84	0.00489544		1785.84	-2.9919e-05		1785.84	0.00168924		1785.84	0.00280636		1785.84	0.00181546
1787.76	0.00488174		1787.76	4.68872e-05		1787.76	0.00172084		1787.76	0.00278288		1787.76	0.00190341
1789.69	0.00459667		1789.69	-0.00015388		1789.69	0.00147086		1789.69	0.00259348		1789.69	0.00128269
1791.62	0.00413745		1791.62	-0.000620522		1791.62	0.00100981		1791.62	0.00230025		1791.62	0.000216651
1793.55	0.00407399		1793.55	-0.000692479		1793.55	0.000998083		1793.55	0.00230445		1793.55	0.000358559
1795.48	0.00422694		1795.48	-0.000467667		1795.48	0.00120776		1795.48	0.00242944		1795.48	0.000871703
1797.41	0.00423172		1797.41	-0.000395473		1797.41	0.00125896		1797.41	0.00243458		1797.41	0.00100054
1799.34	0.00411276		1799.34	-0.000472996		1799.34	0.00116643		1799.34	0.00234639		1799.34	0.000813639
1801.26	0.0040051		1801.26	-0.000565395		1801.26	0.00111414		1801.26	0.00228116		1801.26	0.000686649
1803.19	0.00415869		1803.19	-0.000378822		1803.19	0.00130323		1803.19	0.00237803		1803.19	0.00118799
1805.12	0.00420492		1805.12	-0.000279594		1805.12	0.00139599		1805.12	0.00240332		1805.12	0.00150095
1807.05	0.00414363		1807.05	-0.000329956		1807.05	0.00135285		1807.05	0.00236664		1807.05	0.00141936
1808.98	0.003973		1808.98	-0.000494145		1808.98	0.00120061		1808.98	0.00226957		1808.98	0.00105896
1810.91	0.00383833		1810.91	-0.000622573		1810.91	0.00109028		1810.91	0.00222308		1810.91	0.000794253
1812.84	0.00392261		1812.84	-0.000545474		1812.84	0.00123201		1812.84	0.00225771		1812.84	0.0011248
1814.76	0.0040572		1814.76	-0.000403054		1814.76	0.0014043		1814.76	0.00231754		1814.76	0.00152199
1816.69	0.00400761		1816.69	-0.000412488		1816.69	0.00134949		1816.69	0.00227587		1816.69	0.00146431
1818.62	0.00399717		1818.62	-0.000397989		1818.62	0.00132676		1818.62	0.00225665		1818.62	0.00146933
1820.55	0.00394153		1820.55	-0.000429337		1820.55	0.00131672		1820.55	0.00224189		1820.55	0.0014557
1822.48	0.00381426		1822.48	-0.000540941		1822.48	0.00121666		1822.48	0.00217579		1822.48	0.00118363
1824.41	0.00355348		1824.41	-0.000762143		1824.41	0.000965339		1824.41	0.0020479		1824.41	0.000632957
1826.34	0.00352555		1826.34	-0.000787809		1826.34	0.000930472		1826.34	0.00203355		1826.34	0.000614541
1828.26	0.0033986		1828.26	-0.000913141		1828.26	0.00081012		1828.26	0.00192181		1828.26	0.000303846
1830.19	0.00325156		1830.19	-0.00109906		1830.19	0.000656649		1830.19	0.00182378		1830.19	-2.47836e-05
1832.12	0.00353434		1832.12	-0.0007889		1832.12	0.00101532		1832.12	0.00201285		1832.12	0.00083784
1834.05	0.0036896		1834.05	-0.000596831		1834.05	0.00118563		1834.05	0.00211082		1834.05	0.00123653
1835.98	0.00361478		1835.98	-0.000631738		1835.98	0.00112905		1835.98	0.00203165		1835.98	0.00108454
1837.91	0.00358331		1837.91	-0.00063819		1837.91	0.00114304		1837.91	0.00199194		1837.91	0.00103106
1839.84	0.00361772		1839.84	-0.000600901		1839.84	0.0011937		1839.84	0.00202689		1839.84	0.00115516
1841.76	0.00345594		1841.76	-0.000708424		1841.76	0.00103564		1841.76	0.0019724		1841.76	0.000776693
1843.69	0.00305978		1843.69	-0.00103864		1843.69	0.000679746		1843.69	0.00175414		1843.69	-5.80801e-05
1845.62	0.00310146		1845.62	-0.00102822		1845.62	0.000692556		1845.62	0.00179047		1845.62	8.37047e-05
1847.55	0.00330968		1847.55	-0.000838872		1847.55	0.000936914		1847.55	0.0019116		1847.55	0.000623201
1849.48	0.00344786		1849.48	-0.000685135		1849.48	0.00113171		1849.48	0.00199697		1849.48	0.00101313
1851.41	0.0035174		1851.41	-0.000596533		1851.41	0.00120968		1851.41	0.00203508		1851.41	0.00124231
1853.34	0.00353798		1853.34	-0.000586838		1853.34	0.0012161		1853.34	0.00202796		1853.34	0.00127428
1855.26	0.00352528		1855.26	-0.000583231		1855.26	0.00120583		1855.26	0.00200396		1855.26	0.00129558
1857.19	0.00347682		1857.19	-0.000614037		1857.19	0.0011842		1857.19	0.0019723		1857.19	0.0011939
1859.12	0.00342084		1859.12	-0.000661911		1859.12	0.00117589		1859.12	0.00195876		1859.12	0.0010956
1861.05	0.00341864		1861.05	-0.000667767		1861.05	0.00119573		1861.05	0.0019768		1861.05	0.00110311
1862.98	0.00342234		1862.98	-0.000646262		1862.98	0.00121802		1862.98	0.0019544		1862.98	0.00111194
1864.91	0.00331449		1864.91	-0.0007115		1864.91	0.00111928		1864.91	0.00186727		1864.91	0.000826785
1866.83	0.0029743		1866.83	-0.00103596		1866.83	0.000754388		1866.83	0.00165538		1866.83	1.09343e-06
1868.76	0.00281739		1868.76	-0.00130709		1868.76	0.000505157		1868.76	0.00153689		1868.76	-0.000484216
1870.69	0.00314331		1870.69	-0.00099877		1870.69	0.000810286		1870.69	0.00175088		1870.69	0.000379716
1872.62	0.00339019		1872.62	-0.000682555		1872.62	0.00109487		1872.62	0.0019296		1872.62	0.00107597
1874.55	0.00344088		1874.55	-0.000612382		1874.55	0.00117304		1874.55	0.00193742		1874.55	0.00122377
1876.48	0.0034491		1876.48	-0.000586739		1876.48	0.00120948		1876.48	0.00192514		1876.48	0.00121467
1878.41	0.00341697		1878.41	-0.000598187		1878.41	0.00120885		1878.41	0.00194917		1878.41	0.00117872
1880.33	0.00342682		1880.33	-0.000607022		1880.33	0.00120118		1880.33	0.00197976		1880.33	0.00119364
1882.26	0.00341627		1882.26	-0.000615393		1882.26	0.00118732		1882.26	0.00194571		1882.26	0.00117603
1884.19	0.00339069		1884.19	-0.000610331		1884.19	0.00115217		1884.19	0.00190487		1884.19	0.00110125
1886.12	0.00335997		1886.12	-0.000618503		1886.12	0.00114197		1886.12	0.0019058		1886.12	0.00106873
1888.05	0.00325356		1888.05	-0.000725129		1888.05	0.00104913		1888.05	0.00186211		1888.05	0.00078705
1889.98	0.00315119		1889.98	-0.000855142		1889.98	0.00094847		1889.98	0.00180654		1889.98	0.000579171
1891.91	0.00327763		1891.91	-0.000733399		1891.91	0.00109324		1891.91	0.00189545		1891.91	0.000955011
1893.83	0.00327523		1893.83	-0.00074577		1893.83	0.0010767		1893.83	0.00189472		1893.83	0.000911114
1895.76	0.00326715		1895.76	-0.000788404		1895.76	0.00105109		1895.76	0.00188251		1895.76	0.000842421
1897.69	0.00335572		1897.69	-0.000661183		1897.69	0.00118397		1897.69	0.00194068		1897.69	0.0011158
1899.62	0.00338067		1899.62	-0.000588559		1899.62	0.00126969		1899.62	0.00196049		1899.62	0.0012263
1901.55	0.00334584		1901.55	-0.000603184		1901.55	0.00125783		1901.55	0.00192191		1901.55	0.00118151
1903.48	0.00335295		1903.48	-0.000620158		1903.48	0.00123667		1903.48	0.00193313		1903.48	0.00114722
1905.4	0.00333162		1905.4	-0.000642491		1905.4	0.00121743		1905.4	0.00196348		1905.4	0.00109879
1907.33	0.00324522		1907.33	-0.000716859		1907.33	0.00114327		1907.33	0.00193476		1907.33	0.000913837
1909.26	0.00316734		1909.26	-0.000810828		1909.26	0.00106315		1909.26	0.00185169		1909.26	0.00070832
1911.19	0.00322302		1911.19	-0.000726485		1911.19	0.00114795		1911.19	0.00188268		1911.19	0.000908424
1913.12	0.00329726		1913.12	-0.000620522		1913.12	0.00121115		1913.12	0.00195779		1913.12	0.0011646
1915.05	0.00330975		1915.05	-0.000622374		1915.05	0.00117393		1915.05	0.0019505		1915.05	0.00112108
1916.98	0.00320092		1916.98	-0.000763003		1916.98	0.00105189		1916.98	0.00184594		1916.98	0.000728665
1918.9	0.00324131		1918.9	-0.000830241		1918.9	0.00105059		1918.9	0.00183446		1918.9	0.000700355
1920.83	0.00329306		1920.83	-0.000799087		1920.83	0.00109238		1920.83	0.00187006		1920.83	0.000825557
1922.76	0.00319935		1922.76	-0.000889301		1922.76	0.00100941		1922.76	0.00182711		1922.76	0.000550639
1924.69	0.00331235		1924.69	-0.000752021		1924.69	0.00114277		1924.69	0.00191835		1924.69	0.000859253
1926.62	0.00343049		1926.62	-0.000608147		1926.62	0.00129465		1926.62	0.00200332		1926.62	0.00118683
1928.55	0.00345521		1928.55	-0.000574098		1928.55	0.00133846		1928.55	0.00201291		1928.55	0.00125617
1930.48	0.00348116		1930.48	-0.000553152		1930.48	0.0013456		1930.48	0.00202633		1930.48	0.00128661
1932.4	0.00348266		1932.4	-0.000566686		1932.4	0.00131363		1932.4	0.00200482		1932.4	0.00126112
1934.33	0.0034862		1934.33	-0.000565329		1934.33	0.00131785		1934.33	0.00199217		1934.33	0.0012577
1936.26	0.00348597		1936.26	-0.000557685		1936.26	0.00134982		1936.26	0.00200316		1936.26	0.00128056
1938.19	0.0035001		1938.19	-0.000547725		1938.19	0.00135271		1938.19	0.00201005		1938.19	0.00128103
1940.12	0.00344078		1940.12	-0.000615327		1940.12	0.00128791		1940.12	0.00197387		1940.12	0.00109155
1942.05	0.00328381		1942.05	-0.000810199		1942.05	0.00112786		1942.05	0.00189209		1942.05	0.000653397
1943.98	0.00332587		1943.98	-0.00079826		1943.98	0.00116121		1943.98	0.00191266		1943.98	0.000751268
1945.9	0.00344966		1945.9	-0.000632466		1945.9	0.00129133		1945.9	0.00198229		1945.9	0.00106886
1947.83	0.00351045		1947.83	-0.000528233		1947.83	0.00136641		1947.83	0.00205343		1947.83	0.00126016
1949.76	0.00359601		1949.76	-0.000472367		1949.76	0.00143585		1949.76	0.00211805		1949.76	0.00139935
1951.69	0.00363924		1951.69	-0.000486632		1951.69	0.00144622		1951.69	0.00212158		1951.69	0.00143405
1953.62	0.00364044		1953.62	-0.000520456		1953.62	0.00141673		1953.62	0.00208745		1953.62	0.00140178
1955.55	0.00364395		1955.55	-0.000556097		1955.55	0.00142072		1955.55	0.0020757		1955.55	0.00137412
1957.48	0.00368291		1957.48	-0.000535877		1957.48	0.00146973		1957.48	0.00213286		1957.48	0.00142727
1959.4	0.00370383		1959.4	-0.000519959		1959.4	0.0014654		1959.4	0.0021653		1959.4	0.00143502
1961.33	0.00372221		1961.33	-0.000508972		1961.33	0.00147013		1961.33	0.00218018		1961.33	0.00143459
1963.26	0.00370828		1963.26	-0.000482925		1963.26	0.00149818		1963.26	0.00218351		1963.26	0.00143316
1965.19	0.0036503		1965.19	-0.000527604		1965.19	0.00144931		1965.19	0.00214958		1965.19	0.00123926
1967.12	0.00357165		1967.12	-0.000632664		1967.12	0.00134906		1967.12	0.00211339		1967.12	0.00101353
1969.05	0.00366988		1969.05	-0.000556395		1969.05	0.00143941		1969.05	0.00217316		1969.05	0.00127478
1970.98	0.00381075		1970.98	-0.000470613		1970.98	0.00156648		1970.98	0.00221492		1970.98	0.00154686
1972.9	0.00388988		1972.9	-0.000426491		1972.9	0.00160356		1972.9	0.00226168		1972.9	0.00161893
1974.83	0.00389492		1974.83	-0.000421691		1974.83	0.00158035		1974.83	0.00232866		1974.83	0.0016162
1976.76	0.00390693		1976.76	-0.00044175		1976.76	0.00157935		1976.76	0.00235225		1976.76	0.00160682
1978.69	0.00391599		1978.69	-0.000409178		1978.69	0.00161314		1978.69	0.00231434		1978.69	0.00162205
1980.62	0.00394802		1980.62	-0.000354191		1980.62	0.00165139		1980.62	0.00230648		1980.62	0.00165452
1982.55	0.0039751		1982.55	-0.000362269		1982.55	0.00165851		1982.55	0.00234505		1982.55	0.00165169
1984.48	0.00401339		1984.48	-0.000384913		1984.48	0.00167467		1984.48	0.00236044		1984.48	0.00166719
1986.4	0.0040064		1986.4	-0.000395705		1986.4	0.00166469		1986.4	0.0023234		1986.4	0.00160296
1988.33	0.00398895		1988.33	-0.000427517		1988.33	0.00162751		1988.33	0.00229925		1988.33	0.00149902
1990.26	0.00394437		1990.26	-0.000478986		1990.26	0.00156525		1990.26	0.00228683		1990.26	0.00137153
1992.19	0.00391522		1992.19	-0.000548089		1992.19	0.00151953		1992.19	0.00229249		1992.19	0.00124191
1994.12	0.00403607		1994.12	-0.000460584		1994.12	0.00164294		1994.12	0.00238973		1994.12	0.00150217
1996.05	0.00413206		1996.05	-0.000334889		1996.05	0.00175597		1996.05	0.00246506		1996.05	0.00172826
1997.98	0.00415417		1997.98	-0.000302144		1997.98	0.00176958		1997.98	0.0024607		1997.98	0.00175534
1999.9	0.00420703		1999.9	-0.000284661		1999.9	0.00180465		1999.9	0.00246373		1999.9	0.00180025
2001.83	0.00426715		2001.83	-0.000276647		2001.83	0.0018485		2001.83	0.00246613		2001.83	0.00184444
2003.76	0.00429707		2003.76	-0.000289528		2003.76	0.00185835		2003.76	0.00249082		2003.76	0.00186943
2005.69	0.00430149		2005.69	-0.000280257		2005.69	0.00183742		2005.69	0.00250096		2005.69	0.00186391
2007.62	0.00431046		2007.62	-0.000269429		2007.62	0.00183303		2007.62	0.00249642		2007.62	0.00185003
2009.55	0.00433154		2009.55	-0.000272707		2009.55	0.00188264		2009.55	0.00252628		2009.55	0.00187389
2011.48	0.00437863		2011.48	-0.000248269		2011.48	0.00192893		2011.48	0.00259358		2011.48	0.00192271
2013.4	0.00440497		2013.4	-0.000203925		2013.4	0.00193419		2013.4	0.00259404		2013.4	0.00192963
2015.33	0.00437729		2015.33	-0.000232638		2015.33	0.00188101		2015.33	0.00256011		2015.33	0.00179363
2017.26	0.00433104		2017.26	-0.000327075		2017.26	0.00181972		2017.26	0.00256428		2017.26	0.00163778
2019.19	0.00439603		2019.19	-0.000285621		2019.19	0.00189322		2019.19	0.00263258		2019.19	0.00179972
2021.12	0.00448189		2021.12	-0.000206376		2021.12	0.00199204		2021.12	0.00266751		2021.12	0.00195576
2023.05	0.00456044		2023.05	-0.000171534		2023.05	0.00201737		2023.05	0.00270012		2023.05	0.00200922
2024.97	0.0046181		2024.97	-0.000170905		2024.97	0.00203249		2024.97	0.00272219		2024.97	0.00206355
2026.9	0.00464905		2026.9	-0.000169878		2026.9	0.0020742		2026.9	0.00273403		2026.9	0.00208815
2028.83	0.00466666		2028.83	-0.000156729		2028.83	0.00207623		2028.83	0.0027471		2028.83	0.00209577
2030.76	0.00468231		2030.76	-0.000146163		2030.76	0.00208892		2030.76	0.00276781		2030.76	0.00211792
2032.69	0.0046888		2032.69	-0.000125361		2032.69	0.00213047		2032.69	0.00276407		2032.69	0.00211312
2034.62	0.00472347		2034.62	-8.44836e-05		2034.62	0.00216097		2034.62	0.00276347		2034.62	0.0021308
2036.55	0.00475308		2036.55	-8.83595e-05		2036.55	0.00214971		2036.55	0.00279852		2036.55	0.00215607
2038.47	0.00477067		2038.47	-9.87282e-05		2038.47	0.00212644		2038.47	0.0028286		2038.47	0.00215784
2040.4	0.0047566		2040.4	-9.43555e-05		2040.4	0.00212038		2040.4	0.00281883		2040.4	0.00209344
2042.33	0.00479137		2042.33	-4.61864e-05		2042.33	0.00214988		2042.33	0.00284421		2042.33	0.00211662
2044.26	0.00485932		2044.26	-9.31056e-06		2044.26	0.00219693		2044.26	0.00289527		2044.26	0.00221085
2046.19	0.00489638		2046.19	-1.72297e-06		2046.19	0.00223413		2046.19	0.00291912		2046.19	0.00226544
2048.12	0.00492259		2048.12	2.31282e-05		2048.12	0.00225655		2048.12	0.0029309		2048.12	0.00228759
2050.05	0.0049572		2050.05	5.24544e-05		2050.05	0.00226228		2050.05	0.00295005		2050.05	0.00232107
2051.97	0.00496659		2051.97	5.64309e-05		2051.97	0.00227886		2051.97	0.0029691		2051.97	0.00234639
2053.9	0.00498804		2053.9	4.3474e-05		2053.9	0.00230461		2053.9	0.00296266		2053.9	0.00234419
2055.83	0.0050049		2055.83	2.3824e-05		2055.83	0.00231907		2055.83	0.00295518		2055.83	0.00232297
2057.76	0.00500637		2057.76	3.26051e-05		2057.76	0.00231927		2057.76	0.00297553		2057.76	0.00231317
2059.69	0.00502548		2059.69	4.924e-05		2059.69	0.00233229		2059.69	0.00301127		2059.69	0.00230365
2061.62	0.00506476		2061.62	6.27935e-05		2061.62	0.00238406		2061.62	0.00304587		2061.62	0.0023262
2063.55	0.00504814		2063.55	5.11951e-05		2063.55	0.00236994		2063.55	0.0030457		2063.55	0.00228746
2065.47	0.00505095		2065.47	4.91737e-05		2065.47	0.00232836		2065.47	0.00305424		2065.47	0.00225991
2067.4	0.00511867		2067.4	8.90403e-05		2067.4	0.00236564		2067.4	0.00307857		2067.4	0.00239006
2069.33	0.00515924		2069.33	0.000121354		2069.33	0.00240072		2069.33	0.00308154		2069.33	0.00246606
2071.26	0.00516846		2071.26	0.000135771		2071.26	0.00239503		2071.26	0.0030513		2071.26	0.002469
2073.19	0.00517571		2073.19	0.000128579		2073.19	0.00241482		2073.19	0.00305758		2073.19	0.0024637
2075.12	0.00520471		2075.12	0.000137826		2075.12	0.00245037		2075.12	0.00310657		2075.12	0.0024676
2077.05	0.00525783		2077.05	0.000169447		2077.05	0.00246037		2077.05	0.00313697		2077.05	0.00249299
2078.97	0.00526075		2078.97	0.000164608		2078.97	0.00244904		2078.97	0.00311848		2078.97	0.00249482
2080.9	0.00526531		2080.9	0.000151117		2080.9	0.00245334		2080.9	0.00312158		2080.9	0.00251288
2082.83	0.00531294		2082.83	0.000158774		2082.83	0.00246996		2082.83	0.00312953		2082.83	0.00256558
2084.76	0.00532599		2084.76	0.000191557		2084.76	0.00248713		2084.76	0.00312726		2084.76	0.00256628
2086.69	0.00532515		2086.69	0.000190728		2086.69	0.00248732		2086.69	0.00312422		2086.69	0.00253318
2088.62	0.00533088		2088.62	0.000175712		2088.62	0.00247146		2088.62	0.0031316		2088.62	0.00251558
2090.55	0.00531844		2090.55	0.000171138		2090.55	0.00248383		2090.55	0.0031584		2090.55	0.00250865
2092.47	0.0053601		2092.47	0.000205082		2092.47	0.00252128		2092.47	0.00320309		2092.47	0.00255384
2094.4	0.00538902		2094.4	0.000244101		2094.4	0.00253275		2094.4	0.00319725		2094.4	0.00259434
2096.33	0.00539261		2096.33	0.000254312		2096.33	0.00253818		2096.33	0.00318503		2096.33	0.00261421
2098.26	0.00538278		2098.26	0.000255638		2098.26	0.00257354		2098.26	0.0032144		2098.26	0.00259271
2100.19	0.00540744		2100.19	0.000268767		2100.19	0.00259378		2100.19	0.00323243		2100.19	0.00259234
2102.12	0.00543542		2102.12	0.000286704		2102.12	0.00256894		2102.12	0.00322191		2102.12	0.00261201
2104.05	0.00543921		2104.05	0.000310676		2104.05	0.00255824		2104.05	0.00323083		2104.05	0.00260834
2105.97	0.00544622		2105.97	0.000311837		2105.97	0.00255665		2105.97	0.003259		2105.97	0.00261318
2107.9	0.00546568		2107.9	0.000301591		2107.9	0.00257484		2107.9	0.00328257		2107.9	0.00264148
2109.83	0.00546414		2109.83	0.00029433		2109.83	0.00259224		2109.83	0.00327085		2109.83	0.00264624
2111.76	0.00546776		2111.76	0.000284748		2111.76	0.00259104		2111.76	0.00324592		2111.76	0.00263998
2113.69	0.00545679		2113.69	0.000299071		2113.69	0.00261214		2113.69	0.00325283		2113.69	0.00263808
2115.62	0.0054481		2115.62	0.000323044		2115.62	0.00265795		2115.62	0.0032604		2115.62	0.00262774
2117.55	0.00544545		2117.55	0.000330008		2117.55	0.00266301		2117.55	0.00327429		2117.55	0.00261898
2119.47	0.00545726		2119.47	0.000327853		2119.47	0.00265301		2119.47	0.00329439		2119.47	0.00261848
2121.4	0.00545303		2121.4	0.000331865		2121.4	0.00265118		2121.4	0.00328297		2121.4	0.00264024
2123.33	0.0054688		2123.33	0.000349307		2123.33	0.00266991		2123.33	0.00325232		2123.33	0.00266771
2125.26	0.00550883		2125.26	0.000358294		2125.26	0.00268508		2125.26	0.00324498		2125.26	0.00267388
2127.19	0.0054791		2127.19	0.000383464		2127.19	0.00268495		2127.19	0.00327943		2127.19	0.00266371
2129.12	0.00543723		2129.12	0.000404025		2129.12	0.00266695		2129.12	0.0033204		2129.12	0.00265324
2131.05	0.00542327		2131.05	0.000381474		2131.05	0.00265008		2131.05	0.00332527		2131.05	0.00266291
2132.97	0.0054272		2132.97	0.0003506		2132.97	0.00265024		2132.97	0.00330828		2132.97	0.00266385
2134.9	0.00546145		2134.9	0.000363699		2134.9	0.00265108		2134.9	0.00327322		2134.9	0.00264938
2136.83	0.00545696		2136.83	0.000403429		2136.83	0.00265935		2136.83	0.00324632		2136.83	0.00263264
2138.76	0.00544595		2138.76	0.000440309		2138.76	0.00264988		2138.76	0.00325303		2138.76	0.00264368
2140.69	0.00542632		2140.69	0.000429132		2140.69	0.00263664		2140.69	0.00327342		2140.69	0.00261874
2142.62	0.00539425		2142.62	0.000406612		2142.62	0.00265218		2142.62	0.0032821		2142.62	0.00260091
2144.55	0.00539261		2144.55	0.000424456		2144.55	0.00266275		2144.55	0.00325934		2144.55	0.00261614
2146.47	0.00539331		2146.47	0.000459315		2146.47	0.00267718		2146.47	0.00322846		2146.47	0.00262141
2148.4	0.00539194		2148.4	0.000462035		2148.4	0.00265365		2148.4	0.00320533		2148.4	0.00261618
2150.33	0.0053912		2150.33	0.000436329		2150.33	0.00262028		2150.33	0.00321944		2150.33	0.00261818
2152.26	0.00536426		2152.26	0.000408768		2152.26	0.00264138		2152.26	0.00323153		2152.26	0.00260258
2154.19	0.00533612		2154.19	0.000391589		2154.19	0.00266415		2154.19	0.00321504		2154.19	0.00257904
2156.12	0.00530992		2156.12	0.000409034		2156.12	0.00264734		2156.12	0.00317849		2156.12	0.00255634
2158.05	0.00529422		2158.05	0.000410062		2158.05	0.00263208		2158.05	0.00314731		2158.05	0.00255145
2159.97	0.00529221		2159.97	0.000396199		2159.97	0.00264468		2159.97	0.0031328		2159.97	0.00254598
2161.9	0.00529768		2161.9	0.000421404		2161.9	0.00263441		2161.9	0.00312525		2161.9	0.00254571
2163.83	0.00528761		2163.83	0.000454705		2163.83	0.00262521		2163.83	0.00312549		2163.83	0.00257044
2165.76	0.00527048		2165.76	0.000477426		2165.76	0.00262351		2165.76	0.00311761		2165.76	0.00255868
2167.69	0.00524462		2167.69	0.000475834		2167.69	0.00260998		2167.69	0.00310159		2167.69	0.00250679
2169.62	0.00524264		2169.62	0.000478885		2169.62	0.00260307		2169.62	0.00308304		2169.62	0.00249302
2171.55	0.00522765		2171.55	0.000482866		2171.55	0.00260514		2171.55	0.00307593		2171.55	0.00251032
2173.47	0.00519475		2173.47	0.000465882		2173.47	0.00259614		2173.47	0.00308698		2173.47	0.00250845
2175.4	0.00516213		2175.4	0.000437457		2175.4	0.00259011		2175.4	0.00307059		2175.4	0.0024639
2177.33	0.00512907		2177.33	0.000449995		2177.33	0.00258998		2177.33	0.00304717		2177.33	0.00243014
2179.26	0.0050947		2179.26	0.000476862		2179.26	0.00257484		2179.26	0.00303345		2179.26	0.00241072
2181.19	0.00507093		2181.19	0.000458021		2181.19	0.00255358		2181.19	0.00301464		2181.19	0.00239692
2183.12	0.00505172		2183.12	0.000416993		2183.12	0.00253195		2183.12	0.00300076		2183.12	0.0023836
2185.05	0.00504194		2185.05	0.000410957		2185.05	0.00251958		2185.05	0.00299031		2185.05	0.00240372
2186.97	0.00501619		2186.97	0.000438353		2186.97	0.00250069		2186.97	0.00296779		2186.97	0.00238776
2188.9	0.00496656		2188.9	0.000450227		2188.9	0.00248449		2188.9	0.00294014		2188.9	0.00233179
2190.83	0.00492748		2190.83	0.000435036		2190.83	0.00247173		2190.83	0.00290812		2190.83	0.00230861
2192.76	0.00491806		2192.76	0.000429696		2192.76	0.00247659		2192.76	0.00289564		2192.76	0.00231577
2194.69	0.00491223		2194.69	0.000452084		2194.69	0.00246963		2194.69	0.00285968		2194.69	0.00231361
2196.62	0.00486478		2196.62	0.00045968		2196.62	0.00245987		2196.62	0.0028285		2196.62	0.00228449
2198.55	0.00480879		2198.55	0.000455766		2198.55	0.0024617		2198.55	0.00281356		2198.55	0.00224226
2200.47	0.00481013		2200.47	0.000448535		2200.47	0.00243977		2200.47	0.00281466		2200.47	0.00223963
2202.4	0.00479583		2202.4	0.000433112		2202.4	0.00242531		2202.4	0.00280759		2202.4	0.00225415
2204.33	0.00474943		2204.33	0.00043361		2204.33	0.00242844		2204.33	0.00276004		2204.33	0.00222224
2206.26	0.00471868		2206.26	0.000442399		2206.26	0.00242191		2206.26	0.00272273		2206.26	0.00217665
2208.19	0.00468877		2208.19	0.000434439		2208.19	0.00241282		2208.19	0.00270759		2208.19	0.00215817
2210.12	0.00464687		2210.12	0.000413478		2210.12	0.00239163		2210.12	0.00270489		2210.12	0.00213849
2212.04	0.00463518		2212.04	0.000434903		2212.04	0.00238207		2212.04	0.00269175		2212.04	0.00212764
2213.97	0.0046451		2213.97	0.000459812		2213.97	0.00240872		2213.97	0.00265454		2213.97	0.00213713
2215.9	0.00463555		2215.9	0.000443858		2215.9	0.00241478		2215.9	0.00263071		2215.9	0.00213063
2217.83	0.00460377		2217.83	0.000453278		2217.83	0.00237604		2217.83	0.00262931		2217.83	0.00209511
2219.76	0.00455706		2219.76	0.000474009		2219.76	0.00233516		2219.76	0.00261914		2219.76	0.00206378
2221.69	0.00452488		2221.69	0.0004557		2221.69	0.002316		2221.69	0.00258941		2221.69	0.00205872
2223.62	0.00448809		2223.62	0.000416396		2223.62	0.00230298		2223.62	0.00257534		2223.62	0.00205379
2225.54	0.00445076		2225.54	0.000405584		2225.54	0.00231261		2225.54	0.00256248		2225.54	0.00200912
2227.47	0.00442884		2227.47	0.000440011		2227.47	0.00231021		2227.47	0.00251312		2227.47	0.00198339
2229.4	0.00439603		2229.4	0.000459083		2229.4	0.00227037		2229.4	0.0024574		2229.4	0.00199154
2231.33	0.00436892		2231.33	0.000483031		2231.33	0.00225581		2231.33	0.00243904		2231.33	0.00198698
2233.26	0.00437016		2233.26	0.000489102		2233.26	0.00225315		2233.26	0.00243404		2233.26	0.00196328
2235.19	0.00436173		2235.19	0.000445451		2235.19	0.00224539		2235.19	0.00243074		2235.19	0.00193842
2237.12	0.00431959		2237.12	0.000417856		2237.12	0.00224399		2237.12	0.00244127		2237.12	0.00191812
2239.04	0.00429955		2239.04	0.000424389		2239.04	0.00226078		2239.04	0.00243957		2239.04	0.00190843
2240.97	0.0042952		2240.97	0.000442498		2240.97	0.00224353		2240.97	0.00240402		2240.97	0.00188374
2242.9	0.0042696		2242.9	0.000450791		2242.9	0.00220536		2242.9	0.00237777		2242.9	0.00186554
2244.83	0.00422389		2244.83	0.000447971		2244.83	0.00218704		2244.83	0.00234792		2244.83	0.00184936
2246.76	0.00418846		2246.76	0.00043812		2246.76	0.00218891		2246.76	0.00234026		2246.76	0.00182371
2248.69	0.00415608		2248.69	0.00043958		2248.69	0.0021928		2248.69	0.00235875		2248.69	0.00179639
2250.61	0.00412922		2250.61	0.000445716		2250.61	0.00219244		2250.61	0.00235212		2250.61	0.00176975
2252.54	0.00410497		2252.54	0.000436761		2252.54	0.00217043		2252.54	0.00231934		2252.54	0.00171715
2254.47	0.00407138		2254.47	0.000427673		2254.47	0.00212847		2254.47	0.00230531		2254.47	0.00167823
2256.4	0.00403904		2256.4	0.000416562		2256.4	0.00210896		2256.4	0.00230664		2256.4	0.00164716
2258.33	0.00399774		2258.33	0.000402367		2258.33	0.00213073		2258.33	0.00230241		2258.33	0.00160406
2260.26	0.00394618		2260.26	0.000373548		2260.26	0.00213143		2260.26	0.00228043		2260.26	0.00155611
2262.19	0.00390709		2262.19	0.000356669		2262.19	0.0020991		2262.19	0.00225695		2262.19	0.00151508
2264.11	0.00388556		2264.11	0.000377229		2264.11	0.00206058		2264.11	0.00223886		2264.11	0.00148791
2266.04	0.00386731		2266.04	0.000388969		2266.04	0.00202353		2266.04	0.00223217		2266.04	0.00146826
2267.97	0.00382693		2267.97	0.000389135		2267.97	0.00201078		2267.97	0.00220975		2267.97	0.00143232
2269.9	0.00379791		2269.9	0.000389864		2269.9	0.00201274		2269.9	0.00219723		2269.9	0.00140387
2271.83	0.0037825		2271.83	0.00039799		2271.83	0.00199983		2271.83	0.00218441		2271.83	0.00140816
2273.76	0.00376506		2273.76	0.000395005		2273.76	0.00198255		2273.76	0.00218315		2273.76	0.00141078
2275.69	0.0037434		2275.69	0.00038091		2275.69	0.00198602		2275.69	0.00217359		2275.69	0.00138788
2277.61	0.00371867		2277.61	0.000405087		2277.61	0.00199837		2277.61	0.00214032		2277.61	0.00138256
2279.54	0.00367533		2279.54	0.0004288		2279.54	0.00202892		2279.54	0.00211485		2279.54	0.001382
2281.47	0.0036631		2281.47	0.000425981		2281.47	0.00204257		2281.47	0.00208981		2281.47	0.00142056
2283.4	0.00365267		2283.4	0.000435965		2283.4	0.00201804		2283.4	0.00207327		2283.4	0.0014288
2285.33	0.00361605		2285.33	0.000418851		2285.33	0.00196771		2285.33	0.00208395		2285.33	0.00135517
2287.26	0.00355572		2287.26	0.000369768		2287.26	0.00189768		2287.26	0.0021028		2287.26	0.0012357
2289.19	0.00347478		2289.19	0.000326559		2289.19	0.00184783		2289.19	0.00208772		2289.19	0.00110978
2291.11	0.00339105		2291.11	0.000284118		2291.11	0.00179074		2291.11	0.00204474		2291.11	0.00098005
2293.04	0.00332925		2293.04	0.000258589		2293.04	0.00172094		2293.04	0.00203222		2293.04	0.000853012
2294.97	0.00328354		2294.97	0.000238763		2294.97	0.00165142		2294.97	0.0020445		2294.97	0.000708154
2296.9	0.00320432		2296.9	0.000193645		2296.9	0.00154946		2296.9	0.00207313		2296.9	0.000540056
2298.83	0.00312993		2298.83	0.000128612		2298.83	0.00146979		2298.83	0.00210843		2298.83	0.000390826
2300.76	0.00303859		2300.76	7.95953e-05		2300.76	0.00143226		2300.76	0.00213113		2300.76	0.000248112
2302.69	0.00292826		2302.69	4.39711e-05		2302.69	0.00142099		2302.69	0.00211685		2302.69	9.80216e-05
2304.61	0.00282433		2304.61	-1.96149e-05		2304.61	0.00134657		2304.61	0.00211109		2304.61	-9.14072e-05
2306.54	0.00266588		2306.54	-0.000121949		2306.54	0.0011849		2306.54	0.00212834		2306.54	-0.000393388
2308.47	0.00250939		2308.47	-0.000247043		2308.47	0.00103116		2308.47	0.00216227		2308.47	-0.00072331
2310.4	0.00238763		2310.4	-0.00034704		2310.4	0.000921706		2310.4	0.00221878		2310.4	-0.00101467
2312.33	0.00221655		2312.33	-0.000422353		2312.33	0.000826586		2312.33	0.00225741		2312.33	-0.00126444
2314.26	0.00205113		2314.26	-0.000500201		2314.26	0.000729196		2314.26	0.0022733		2314.26	-0.00148405
2316.19	0.00195876		2316.19	-0.000593522		2316.19	0.000615735		2316.19	0.00232547		2316.19	-0.00173283
2318.11	0.00180178		2318.11	-0.000720631		2318.11	0.000430824		2318.11	0.00240429		2318.11	-0.00211908
2320.04	0.00151637		2320.04	-0.000931624		2320.04	0.00020359		2320.04	0.00238883		2320.04	-0.00265577
2321.97	0.0012796		2321.97	-0.00111347		2321.97	-3.08467e-05		2321.97	0.00233686		2321.97	-0.0031698
2323.9	0.00111533		2323.9	-0.00126771		2323.9	-0.000243666		2323.9	0.00233106		2323.9	-0.00353315
2325.83	0.000897966		2325.83	-0.00143756		2325.83	-0.000406596		2325.83	0.00234062		2325.83	-0.00388851
2327.76	0.000707192		2327.76	-0.00160806		2327.76	-0.00056116		2327.76	0.00240952		2327.76	-0.00428785
2329.69	0.000494741		2329.69	-0.0017123		2329.69	-0.00073965		2329.69	0.0024695		2329.69	-0.00463957
2331.61	0.000350302		2331.61	-0.00168319		2331.61	-0.000868072		2331.61	0.00243961		2331.61	-0.00485067
2333.54	0.000294827		2333.54	-0.00166764		2333.54	-0.000896014		2333.54	0.00239119		2333.54	-0.00485824
2335.47	0.000265916		2335.47	-0.00173352		2335.47	-0.000850976		2335.47	0.00245477		2335.47	-0.00487436
2337.4	0.000171337		2337.4	-0.00184604		2337.4	-0.000903784		2337.4	0.00249086		2337.4	-0.0050636
2339.33	4.16515e-05		2339.33	-0.0020156		2339.33	-0.00101361		2339.33	0.00250875		2339.33	-0.00530847
2341.26	-8.86908e-05		2341.26	-0.00214209		2341.26	-0.00111089		2341.26	0.00248949		2341.26	-0.00564184
2343.19	-2.84612e-05		2343.19	-0.00206503		2343.19	-0.00109602		2343.19	0.00232696		2343.19	-0.0056021
2345.11	0.00025408		2345.11	-0.00174276		2345.11	-0.000841815		2345.11	0.00224206		2345.11	-0.0049996
2347.04	0.000781008		2347.04	-0.00126794		2347.04	-0.000323202		2347.04	0.00221252		2347.04	-0.00382516
2348.97	0.00102907		2348.97	-0.00105662		2348.97	-0.000110322		2348.97	0.00217582		2348.97	-0.00329313
2350.9	0.000726641		2350.9	-0.00136427		2350.9	-0.000448337		2350.9	0.00214232		2350.9	-0.00398308
2352.83	0.000100043		2352.83	-0.00191892		2352.83	-0.00107837		2352.83	0.00215028		2352.83	-0.00530365
2354.76	-0.00056662		2354.76	-0.002349		2354.76	-0.0016582		2354.76	0.00222937		2354.76	-0.00658146
2356.69	-0.00110051		2356.69	-0.00272967		2356.69	-0.00212557		2356.69	0.0021683		2356.69	-0.00747313
2358.61	-0.0014039		2358.61	-0.00292669		2358.61	-0.00236482		2358.61	0.00193236		2358.61	-0.0079932
2360.54	-0.00146645		2360.54	-0.00298395		2360.54	-0.00239669		2360.54	0.00188644		2360.54	-0.00825671
2362.47	-0.00140324		2362.47	-0.0028733		2362.47	-0.00225187		2362.47	0.00214665		2362.47	-0.00811065
2364.4	-0.00124663		2364.4	-0.00269849		2364.4	-0.00216543		2364.4	0.00218195		2364.4	-0.00768897
2366.33	-0.000980554		2366.33	-0.00248367		2366.33	-0.00183113		2366.33	0.00207486		2366.33	-0.00692869
2368.26	-0.000496429		2368.26	-0.00205791		2368.26	-0.00139971		2368.26	0.00208322		2368.26	-0.00588648
2370.19	7.71097e-05		2370.19	-0.00168279		2370.19	-0.00102574		2370.19	0.00197806		2370.19	-0.00485005
2372.11	0.000565602		2372.11	-0.00131105		2372.11	-0.000561358		2372.11	0.00189719		2372.11	-0.00389873
2374.04	0.00104142		2374.04	-0.000945146		2374.04	-7.65991e-05		2374.04	0.00185469		2374.04	-0.0029047
2375.97	0.00146374		2375.97	-0.000557222		2375.97	0.000316247		2375.97	0.00175045		2375.97	-0.00204515
2377.9	0.00180445		2377.9	-0.000207966		2377.9	0.000653729		2377.9	0.00168488		2377.9	-0.00137913
2379.83	0.00209041		2379.83	6.45499e-05		2379.83	0.000952953		2379.83	0.00163559		2379.83	-0.000765913
2381.76	0.00234732		2381.76	0.000294894		2381.76	0.00120261		2381.76	0.00160612		2381.76	-0.000155338
2383.68	0.00254295		2383.68	0.000477028		2383.68	0.00140377		2383.68	0.00154786		2383.68	0.000366883
2385.61	0.00267021		2385.61	0.000616266		2385.61	0.00156685		2385.61	0.00145101		2385.61	0.00071227
2387.54	0.00273326		2387.54	0.000686716		2387.54	0.0016778		2387.54	0.00138861		2387.54	0.000884917
2389.47	0.0027562		2389.47	0.000699658		2389.47	0.00171678		2389.47	0.00136269		2389.47	0.000944086
2391.4	0.0027482		2391.4	0.000718941		2391.4	0.00171898		2391.4	0.0013588		2391.4	0.000947805
2393.33	0.00273146		2393.33	0.000758769		2393.33	0.00169433		2393.33	0.00136787		2393.33	0.000938441
2395.26	0.00271359		2395.26	0.000789207		2395.26	0.00168472		2395.26	0.00136365		2395.26	0.000946079
2397.18	0.00268365		2397.18	0.00078549		2397.18	0.00171592		2397.18	0.0013474		2397.18	0.000952654
2399.11	0.00266595		2399.11	0.000787448		2399.11	0.00173658		2399.11	0.0013117		2399.11	0.000950362
2401.04	0.00266921		2401.04	0.000789008		2401.04	0.00173784		2401.04	0.00130775		2401.04	0.000966136
2402.97	0.00266751		2402.97	0.000779183		2402.97	0.00172873		2402.97	0.00132636		2402.97	0.000965538
2404.9	0.00266841		2404.9	0.000785025		2404.9	0.00169939		2404.9	0.00133789		2404.9	0.000945016
2406.83	0.00266461		2406.83	0.000812079		2406.83	0.00169852		2406.83	0.00135394		2406.83	0.000949831
2408.76	0.00264968		2408.76	0.000817291		2408.76	0.00172956		2408.76	0.00134537		2408.76	0.000968427
2410.68	0.00263581		2410.68	0.000825524		2410.68	0.00172966		2410.68	0.00130087		2410.68	0.000968195
2412.61	0.00263474		2412.61	0.000846007		2412.61	0.00171136		2412.61	0.0013003		2412.61	0.00097653
2414.54	0.00262344		2414.54	0.000862075		2414.54	0.00169829		2414.54	0.00129907		2414.54	0.000963778
2416.47	0.00259254		2416.47	0.000870939		2416.47	0.00169623		2416.47	0.00128781		2416.47	0.000946643
2418.4	0.00257694		2418.4	0.000863569		2418.4	0.00169865		2418.4	0.00128757		2418.4	0.000921208
2420.33	0.00258911		2420.33	0.000862739		2420.33	0.00169805		2420.33	0.00127199		2420.33	0.000900887
2422.26	0.00258544		2422.26	0.000859087		2422.26	0.00169436		2422.26	0.00126813		2422.26	0.000914302
2424.18	0.00258618		2424.18	0.00085414		2424.18	0.00171732		2424.18	0.00126056		2424.18	0.000930837
2426.11	0.00257874		2426.11	0.00088329		2426.11	0.0017416		2426.11	0.001237		2426.11	0.000926554
2428.04	0.00255301		2428.04	0.000909719		2428.04	0.00173721		2428.04	0.00123783		2428.04	0.000913272
2429.97	0.00254241		2429.97	0.000911147		2429.97	0.00173238		2429.97	0.00125411		2429.97	0.000922868
2431.9	0.00251062		2431.9	0.000906731		2431.9	0.00174556		2431.9	0.00123627		2431.9	0.000901751
2433.83	0.00249519		2433.83	0.0008977		2433.83	0.0017437		2433.83	0.00123826		2433.83	0.000885183
2435.76	0.00250182		2435.76	0.0009146		2435.76	0.001742		2435.76	0.0012684		2435.76	0.000882593
2437.68	0.00252068		2437.68	0.000951093		2437.68	0.00175288		2437.68	0.00126019		2437.68	0.00088588
2439.61	0.00250782		2439.61	0.00095448		2439.61	0.0017427		2439.61	0.00124338		2439.61	0.000888237
2441.54	0.0024675		2441.54	0.000940533		2441.54	0.00171219		2441.54	0.0012588		2441.54	0.000868649
2443.47	0.00244457		2443.47	0.000940201		2443.47	0.00170354		2443.47	0.00124447		2443.47	0.00084604
2445.4	0.00244567		2445.4	0.000966933		2445.4	0.00169942		2445.4	0.00120882		2445.4	0.000854871
2447.33	0.00245054		2447.33	0.00102439		2447.33	0.00172221		2447.33	0.00121251		2447.33	0.000882327
2449.26	0.00245557		2449.26	0.00104631		2449.26	0.00173155		2449.26	0.00120872		2449.26	0.000875687
2451.18	0.00244144		2451.18	0.00100227		2451.18	0.00172836		2451.18	0.00119334		2451.18	0.000829905
2453.11	0.00243191		2453.11	0.000990445		2453.11	0.00172633		2453.11	0.00120041		2453.11	0.000809058
2455.04	0.00243964		2455.04	0.000990445		2455.04	0.00170724		2455.04	0.00120427		2455.04	0.000834454
2456.97	0.00242085		2456.97	0.00100917		2456.97	0.00169939		2456.97	0.00119374		2456.97	0.000824959
2458.9	0.00239619		2458.9	0.00102435		2458.9	0.00171735		2458.9	0.00117363		2458.9	0.00081095
2460.83	0.00237277		2460.83	0.00103153		2460.83	0.00172952		2460.83	0.00119141		2460.83	0.000802286
2462.76	0.00236318		2462.76	0.00104225		2462.76	0.00172573		2462.76	0.00120407		2462.76	0.00079807
2464.68	0.00237767		2464.68	0.00103295		2464.68	0.00172234		2464.68	0.00117158		2464.68	0.000807564
2466.61	0.0023735		2466.61	0.00104076		2466.61	0.00172234		2466.61	0.00114849		2466.61	0.000818585
2468.54	0.00237813		2468.54	0.00108052		2468.54	0.00172061		2468.54	0.00117051		2468.54	0.000841591
2470.47	0.0023876		2470.47	0.00110311		2470.47	0.00169739		2470.47	0.00116606		2470.47	0.000842587
2472.4	0.002377		2472.4	0.00111085		2472.4	0.0017086		2472.4	0.00112493		2472.4	0.000808295
2474.33	0.00237487		2474.33	0.0011141		2474.33	0.00173884		2474.33	0.00112264		2474.33	0.000783299
2476.26	0.00238863		2476.26	0.00113274		2476.26	0.001723		2476.26	0.00115157		2476.26	0.000769889
2478.18	0.00238193		2478.18	0.0011444		2478.18	0.0017107		2478.18	0.00116928		2478.18	0.000777424
2480.11	0.00237957		2480.11	0.00112908		2480.11	0.00170787		2480.11	0.00115775		2480.11	0.00081105
2482.04	0.0023735		2482.04	0.00112586		2482.04	0.00170035		2482.04	0.00112795		2482.04	0.000825524
2483.97	0.00236174		2483.97	0.00115008		2483.97	0.00169054		2483.97	0.00112985		2483.97	0.00083462
2485.9	0.00237454		2485.9	0.00119261		2485.9	0.00169549		2485.9	0.00116985		2485.9	0.00082403
2487.83	0.00236601		2487.83	0.00122503		2487.83	0.0016908		2487.83	0.00117968		2487.83	0.000773706
2489.76	0.0023296		2489.76	0.00124527		2489.76	0.0016768		2489.76	0.00115898		2489.76	0.000759798
2491.68	0.00234559		2491.68	0.00123407		2491.68	0.00169533		2491.68	0.00114722		2491.68	0.000792294
2493.61	0.00236551		2493.61	0.00122314		2493.61	0.00173831		2493.61	0.00115337		2493.61	0.000809124
2495.54	0.00235538		2495.54	0.00124607		2495.54	0.00174699		2495.54	0.00117304		2495.54	0.000805373
2497.47	0.00235085		2497.47	0.0012567		2497.47	0.00172566		2497.47	0.00118586		2497.47	0.000800991
2499.4	0.00233553		2499.4	0.00124909		2499.4	0.00169822		2499.4	0.00117314		2499.4	0.00079588
2501.33	0.00233639		2501.33	0.00123919		2501.33	0.00170551		2501.33	0.00113676		2501.33	0.000789241
2503.26	0.00236541		2503.26	0.00124507		2503.26	0.00174486		2503.26	0.00113284		2503.26	0.000785589
2505.18	0.00236777		2505.18	0.00127239		2505.18	0.00175354		2505.18	0.00116985		2505.18	0.000790768
2507.11	0.00233179		2507.11	0.00131167		2507.11	0.00174955		2507.11	0.00119214		2507.11	0.000802386
2509.04	0.00232613		2509.04	0.00133836		2509.04	0.00172982		2509.04	0.00118805		2509.04	0.000820843
2510.97	0.00236254		2510.97	0.00135069		2510.97	0.00171888		2510.97	0.00119623		2510.97	0.00083608
2512.9	0.00238446		2512.9	0.00136455		2512.9	0.00172194		2512.9	0.00121155		2512.9	0.000848662
2514.83	0.00240522		2514.83	0.00139935		2514.83	0.0017593		2514.83	0.00121586		2514.83	0.000853875
2516.76	0.00239146		2516.76	0.00140962		2516.76	0.00176948		2516.76	0.00122105		2516.76	0.000830636
2518.68	0.00240046		2518.68	0.00138954		2518.68	0.00173568		2518.68	0.00121832		2518.68	0.000811747
2520.61	0.00242954		2520.61	0.00140271		2520.61	0.00174909		2520.61	0.00120862		2520.61	0.000842952
2522.54	0.00241338		2522.54	0.00141524		2522.54	0.00178615		2522.54	0.00121138		2522.54	0.00085414
2524.47	0.00238846		2524.47	0.00138585		2524.47	0.00177214		2524.47	0.00120443		2524.47	0.000834321
2526.4	0.0023887		2526.4	0.00138632		2526.4	0.0017575		2526.4	0.00119251		2526.4	0.000848164
2528.33	0.00238466		2528.33	0.00141344		2528.33	0.00174293		2528.33	0.00116211		2528.33	0.000848696
2530.26	0.00235565		2530.26	0.0014433		2530.26	0.001725		2530.26	0.0011531		2530.26	0.000819216
2532.18	0.00234685		2532.18	0.00144898		2532.18	0.00174998		2532.18	0.00117672		2532.18	0.000819946
2534.11	0.00237097		2534.11	0.00147451		2534.11	0.00179167		2534.11	0.00119762		2534.11	0.000856962
2536.04	0.00237897		2536.04	0.00149659		2536.04	0.0017756		2536.04	0.00120988		2536.04	0.000838935
2537.97	0.00238043		2537.97	0.00148642		2537.97	0.00173332		2537.97	0.00120527		2537.97	0.000805805
2539.9	0.0023782		2539.9	0.00148595		2539.9	0.0017396		2539.9	0.00119975		2539.9	0.000804909
2541.83	0.0023728		2541.83	0.00149925		2541.83	0.00176981		2541.83	0.00120384		2541.83	0.000815565
2543.76	0.00236334		2543.76	0.00152256		2543.76	0.00180242		2543.76	0.00120397		2543.76	0.000834122
2545.68	0.00235608		2545.68	0.001531		2545.68	0.0018098		2545.68	0.00118038		2545.68	0.00082881
2547.61	0.00235885		2547.61	0.00154191		2547.61	0.00181027		2547.61	0.00119666		2547.61	0.000799431
2549.54	0.00236268		2549.54	0.00156695		2549.54	0.00180724		2549.54	0.00120028		2549.54	0.000792626
2551.47	0.00235944		2551.47	0.00157097		2551.47	0.00179127		2551.47	0.00118822		2551.47	0.000805373
2553.4	0.0023768		2553.4	0.00157656		2553.4	0.00180548		2553.4	0.00122417		2553.4	0.000844911
2555.33	0.0023854		2555.33	0.00158394		2555.33	0.00181107		2555.33	0.00122347		2555.33	0.000849824
2557.26	0.00238207		2557.26	0.00159638		2557.26	0.00180272		2557.26	0.00119799		2557.26	0.000829076
2559.18	0.00238217		2559.18	0.00161896		2559.18	0.00180481		2559.18	0.00119576		2559.18	0.000831599
2561.11	0.00238916		2561.11	0.00162013		2561.11	0.0018313		2561.11	0.00119417		2561.11	0.000843583
2563.04	0.00238939		2563.04	0.00161623		2563.04	0.00183805		2563.04	0.00119942		2563.04	0.000849957
2564.97	0.00238473		2564.97	0.00163669		2564.97	0.0018462		2564.97	0.00120776		2564.97	0.000868317
2566.9	0.00237147		2566.9	0.0016628		2566.9	0.00183482		2566.9	0.00120982		2566.9	0.000860515
2568.83	0.00239013		2568.83	0.00167357		2568.83	0.00181749		2568.83	0.00122503		2568.83	0.000853211
2570.75	0.00240872		2570.75	0.00170275		2570.75	0.00182421		2570.75	0.00124211		2570.75	0.000872467
2572.68	0.00242358		2572.68	0.00171306		2572.68	0.00184987		2572.68	0.00125158		2572.68	0.000896704
2574.61	0.00240919		2574.61	0.0017096		2574.61	0.00185715		2574.61	0.00126724		2574.61	0.000889964
2576.54	0.00241368		2576.54	0.00176446		2576.54	0.00185286		2576.54	0.00128714		2576.54	0.000873064
2578.47	0.00243884		2578.47	0.00183017		2578.47	0.0018503		2578.47	0.00128933		2578.47	0.000871006
2580.4	0.00244524		2580.4	0.00183526		2580.4	0.00186554		2580.4	0.00129462		2580.4	0.000862507
2582.33	0.00244787		2582.33	0.00180604		2582.33	0.00188644		2582.33	0.00130711		2582.33	0.000857294
2584.25	0.00244004		2584.25	0.00182863		2584.25	0.00190933		2584.25	0.00129289		2584.25	0.000858821
2586.18	0.00243511		2586.18	0.00188936		2586.18	0.00191516		2586.18	0.00130286		2586.18	0.000870342
2588.11	0.00242711		2588.11	0.00191559		2588.11	0.00192534		2588.11	0.0012998		2588.11	0.000868449
2590.04	0.00242275		2590.04	0.00190783		2590.04	0.00193592		2590.04	0.00128216		2590.04	0.000848198
2591.97	0.00245497		2591.97	0.0019274		2591.97	0.00191832		2591.97	0.00129612		2591.97	0.000833624
2593.9	0.00249269		2593.9	0.00193123		2593.9	0.00191672		2593.9	0.00132284		2593.9	0.000852746
2595.83	0.00250099		2595.83	0.00191542		2595.83	0.00192338		2595.83	0.00133752		2595.83	0.000873795
2597.75	0.00251102		2597.75	0.00194095		2597.75	0.00192787		2597.75	0.00134836		2597.75	0.000878111
2599.68	0.00250915		2599.68	0.00197769		2599.68	0.00195616		2599.68	0.00135371		2599.68	0.000873297
2601.61	0.00252125		2601.61	0.00199683		2601.61	0.00196947		2601.61	0.00136441		2601.61	0.00086752
2603.54	0.00254711		2603.54	0.00200862		2603.54	0.00197413		2603.54	0.00139569		2603.54	0.000888802
2605.47	0.00254665		2605.47	0.00203941		2605.47	0.00198175		2605.47	0.00141351		2605.47	0.000903046
2607.4	0.00255758		2607.4	0.00206857		2607.4	0.0019749		2607.4	0.00141248		2607.4	0.000889831
2609.32	0.00260784		2609.32	0.00208369		2609.32	0.00198389		2609.32	0.00140174		2609.32	0.00090703
2611.25	0.00263308		2611.25	0.00212644		2611.25	0.00201364		2611.25	0.00139812		2611.25	0.000933992
2613.18	0.00263001		2613.18	0.00214142		2613.18	0.00203708		2613.18	0.00140872		2613.18	0.0009232
2615.11	0.00265021		2615.11	0.00213483		2615.11	0.00203951		2615.11	0.00142089		2615.11	0.00091055
2617.04	0.00266321		2617.04	0.00216373		2617.04	0.00202593		2617.04	0.00142066		2617.04	0.000926521
2618.97	0.00267485		2618.97	0.00218505		2618.97	0.00202556		2618.97	0.00140706		2618.97	0.000957469
2620.9	0.00269665		2620.9	0.00220216		2620.9	0.00203784		2620.9	0.00140949		2620.9	0.000975833
2622.82	0.00272593		2622.82	0.00223999		2622.82	0.00207956		2622.82	0.00145137		2622.82	0.000991341
2624.75	0.00276497		2624.75	0.00228096		2624.75	0.00209934		2624.75	0.00147701		2624.75	0.00099878
2626.68	0.00279325		2626.68	0.00228982		2626.68	0.00210163		2626.68	0.00148206		2626.68	0.00101037
2628.61	0.00279915		2628.61	0.00226611		2628.61	0.00210906		2628.61	0.00149436		2628.61	0.00102485
2630.54	0.00279639		2630.54	0.00224636		2630.54	0.002129		2630.54	0.00149639		2630.54	0.00102372
2632.47	0.00278618		2632.47	0.00229319		2632.47	0.00213723		2632.47	0.00150174		2632.47	0.00101562
2634.4	0.00282146		2634.4	0.00235855		2634.4	0.00211981		2634.4	0.00153027		2634.4	0.00102515
2636.32	0.00287569		2636.32	0.00237827		2636.32	0.00214712		2636.32	0.00156628		2636.32	0.00104106
2638.25	0.0028896		2638.25	0.00241645		2638.25	0.00217868		2638.25	0.00160197		2638.25	0.00104631
2640.18	0.00286692		2640.18	0.00243038		2640.18	0.00218385		2640.18	0.00160516		2640.18	0.0010401
2642.11	0.00284314		2642.11	0.00242964		2642.11	0.00221102		2642.11	0.00157998		2642.11	0.0010198
2644.04	0.0028387		2644.04	0.00245993		2644.04	0.00224479		2644.04	0.00158953		2644.04	0.00102459
2645.97	0.00286485		2645.97	0.00249839		2645.97	0.00226201		2645.97	0.00160672		2645.97	0.00104451
2647.9	0.00289734		2647.9	0.00250319		2647.9	0.00224882		2647.9	0.00163699		2647.9	0.00106258
2649.82	0.00296659		2649.82	0.00251915		2649.82	0.00225905		2649.82	0.00166955		2649.82	0.00109361
2651.75	0.00303923		2651.75	0.00255125		2651.75	0.00228036		2651.75	0.00167913		2651.75	0.0011154
2653.68	0.00306709		2653.68	0.00259494		2653.68	0.00227427		2653.68	0.00167717		2653.68	0.00113553
2655.61	0.00306242		2655.61	0.00264381		2655.61	0.00230045		2655.61	0.00167883		2655.61	0.00113197
2657.54	0.00306789		2657.54	0.00265551		2657.54	0.00233779		2657.54	0.00171289		2657.54	0.00113649
2659.47	0.00308341		2659.47	0.00266331		2659.47	0.00233013		2659.47	0.00174919		2659.47	0.00115364
2661.4	0.00308941		2661.4	0.00270699		2661.4	0.00230395		2661.4	0.00173904		2661.4	0.00114473
2663.32	0.00308701		2663.32	0.0027556		2663.32	0.00231677		2663.32	0.00174729		2663.32	0.00113201
2665.25	0.00311267		2665.25	0.00277478		2665.25	0.00235411		2665.25	0.00178552		2665.25	0.00115978
2667.18	0.0031591		2667.18	0.00277061		2667.18	0.00239353		2667.18	0.0017949		2667.18	0.00119832
2669.11	0.00318964		2669.11	0.00279505		2669.11	0.00242441		2669.11	0.00179287		2669.11	0.00119706
2671.04	0.00322148		2671.04	0.00282326		2671.04	0.00242108		2671.04	0.00183825		2671.04	0.00119875
2672.97	0.00327807		2672.97	0.00285098		2672.97	0.002455		2672.97	0.00187649		2672.97	0.00123341
2674.9	0.00333245		2674.9	0.00290732		2674.9	0.00249576		2674.9	0.00187436		2674.9	0.00125265
2676.82	0.00338655		2676.82	0.00294437		2676.82	0.00251198		2676.82	0.00189971		2676.82	0.00128531
2678.75	0.00341907		2678.75	0.00298021		2678.75	0.00252968		2678.75	0.00192917		2678.75	0.00131559
2680.68	0.00345832		2680.68	0.0030086		2680.68	0.00255581		2680.68	0.00195766		2680.68	0.00132662
2682.61	0.00344519		2682.61	0.00299352		2682.61	0.00254261		2682.61	0.00194328		2682.61	0.00130844
2684.54	0.00340755		2684.54	0.00299889		2684.54	0.00253725		2684.54	0.00192794		2684.54	0.00129598
2686.47	0.00343327		2686.47	0.00304477		2686.47	0.00257998		2686.47	0.00190973		2686.47	0.00132393
2688.4	0.00345841		2688.4	0.00305521		2688.4	0.00259701		2688.4	0.00191662		2688.4	0.00132935
2690.32	0.0034841		2690.32	0.00306445		2690.32	0.00258108		2690.32	0.00193619		2690.32	0.00132357
2692.25	0.00352732		2692.25	0.00312732		2692.25	0.00259854		2692.25	0.0019324		2692.25	0.00134919
2694.18	0.00355648		2694.18	0.00318783		2694.18	0.00261754		2694.18	0.00193113		2694.18	0.00137994
2696.11	0.00356293		2696.11	0.0031855		2696.11	0.00261758		2696.11	0.00195523		2696.11	0.00136704
2698.04	0.00357326		2698.04	0.00320139		2698.04	0.00263211		2698.04	0.00199168		2698.04	0.0013704
2699.97	0.00359621		2699.97	0.00324849		2699.97	0.00265475		2699.97	0.00201724		2699.97	0.00139539
2701.9	0.00361789		2701.9	0.00325727		2701.9	0.00267065		2701.9	0.0020453		2701.9	0.00142332
2703.82	0.0036522		2703.82	0.00327526		2703.82	0.00268438		2703.82	0.0020762		2703.82	0.00144389
2705.75	0.00369504		2705.75	0.00332534		2705.75	0.00270869		2705.75	0.00210743		2705.75	0.00144981
2707.68	0.00373966		2707.68	0.00337579		2707.68	0.00273539		2707.68	0.0021282		2707.68	0.00146643
2709.61	0.00378234		2709.61	0.00340541		2709.61	0.00277871		2709.61	0.00214189		2709.61	0.00147824
2711.54	0.00380136		2711.54	0.00342826		2711.54	0.00279762		2711.54	0.00214202		2711.54	0.00148768
2713.47	0.00383953		2713.47	0.003449		2713.47	0.00279385		2713.47	0.00215837		2713.47	0.00152911
2715.4	0.0038656		2715.4	0.00347097		2715.4	0.00280386		2715.4	0.0021948		2715.4	0.00156768
2717.32	0.00385825		2717.32	0.00348834		2717.32	0.00281679		2717.32	0.00220056		2717.32	0.00156472
2719.25	0.00386206		2719.25	0.0035328		2719.25	0.00284848		2719.25	0.0022009		2719.25	0.001561
2721.18	0.00391709		2721.18	0.0035914		2721.18	0.00290808		2721.18	0.00226597		2721.18	0.00157699
2723.11	0.00397835		2723.11	0.00363132		2723.11	0.00293387		2723.11	0.00233506		2723.11	0.00163296
2725.04	0.00406316		2725.04	0.0036658		2725.04	0.00294598		2725.04	0.00239073		2725.04	0.00171788
2726.97	0.00411557		2726.97	0.00372238		2726.97	0.00297146		2726.97	0.00236767		2726.97	0.00173265
2728.9	0.00410085		2728.9	0.00372569		2728.9	0.00298		2728.9	0.00231094		2728.9	0.00169513
2730.82	0.00408419		2730.82	0.0037054		2730.82	0.00298781		2730.82	0.00233786		2730.82	0.0016938
2732.75	0.00409192		2732.75	0.0036926		2732.75	0.00299719		2732.75	0.00234778		2732.75	0.0016947
2734.68	0.00414092		2734.68	0.00372686		2734.68	0.00302768		2734.68	0.00235685		2734.68	0.0017105
2736.61	0.00418361		2736.61	0.00378892		2736.61	0.0030409		2736.61	0.00242964		2736.61	0.00173238
2738.54	0.00420278		2738.54	0.00381105		2738.54	0.00305324		2738.54	0.00246976		2738.54	0.00174659
2740.47	0.00419806		2740.47	0.00382014		2740.47	0.00307566		2740.47	0.00247413		2740.47	0.00174543
2742.39	0.0041999		2742.39	0.00384184		2742.39	0.00311271		2742.39	0.00250312		2742.39	0.00175205
2744.32	0.00424745		2744.32	0.00386968		2744.32	0.00313537		2744.32	0.00254288		2744.32	0.00178748
2746.25	0.00435132		2746.25	0.0039197		2746.25	0.00317465		2746.25	0.00259618		2746.25	0.00185492
2748.18	0.00441257		2748.18	0.00396123		2748.18	0.00321851		2748.18	0.00263578		2748.18	0.00191482
2750.11	0.00442043		2750.11	0.00397875		2750.11	0.00320916		2750.11	0.00263931		2750.11	0.00193632
2752.04	0.00441789		2752.04	0.0039832		2752.04	0.00318129		2752.04	0.00260104		2752.04	0.00189978
2753.97	0.00444531		2753.97	0.00400951		2753.97	0.00320008		2753.97	0.00259328		2753.97	0.00188833
2755.89	0.00446867		2755.89	0.00404068		2755.89	0.00325613		2755.89	0.00265355		2755.89	0.00192411
2757.82	0.00451069		2757.82	0.00407289		2757.82	0.00330013		2757.82	0.00269799		2757.82	0.00194298
2759.75	0.00453255		2759.75	0.00410801		2759.75	0.00330467		2759.75	0.00273149		2759.75	0.00195093
2761.68	0.00454507		2761.68	0.00415394		2761.68	0.0032827		2761.68	0.00275203		2761.68	0.00197004
2763.61	0.00459875		2763.61	0.00419294		2763.61	0.00330664		2763.61	0.00276837		2763.61	0.00197823
2765.54	0.00466087		2765.54	0.00422058		2765.54	0.00335366		2765.54	0.00281589		2765.54	0.00200769
2767.47	0.00471778		2767.47	0.00425521		2767.47	0.00337469		2767.47	0.00287803		2767.47	0.00205865
2769.39	0.00476149		2769.39	0.00427666		2769.39	0.00342649		2769.39	0.00292466		2769.39	0.00208648
2771.32	0.00481968		2771.32	0.00430915		2771.32	0.00350678		2771.32	0.00294821		2771.32	0.00212784
2773.25	0.00493274		2773.25	0.00440765		2773.25	0.00354266		2773.25	0.00303315		2773.25	0.00220386
2775.18	0.00500158		2775.18	0.00448725		2775.18	0.00355662		2775.18	0.00310984		2775.18	0.00226028
2777.11	0.00498888		2777.11	0.00453319		2777.11	0.00357847		2777.11	0.00309679		2777.11	0.00226954
2779.04	0.0050411		2779.04	0.00457079		2779.04	0.00358381		2779.04	0.00308561		2779.04	0.00229712
2780.97	0.00513969		2780.97	0.0046036		2780.97	0.0036084		2780.97	0.00314067		2780.97	0.00232373
2782.89	0.00518603		2782.89	0.00462828		2782.89	0.00366039		2782.89	0.00323864		2782.89	0.00236111
2784.82	0.0052414		2784.82	0.00465407		2784.82	0.00373668		2784.82	0.00333783		2784.82	0.00245537
2786.75	0.00534574		2786.75	0.00471379		2786.75	0.00380584		2786.75	0.00340441		2786.75	0.00253618
2788.68	0.00549058		2788.68	0.00479844		2788.68	0.0038397		2788.68	0.00343434		2788.68	0.00259628
2790.61	0.0055927		2790.61	0.00484689		2790.61	0.00391405		2790.61	0.00347839		2790.61	0.00265091
2792.54	0.00565822		2792.54	0.00490211		2792.54	0.00398911		2792.54	0.00352712		2792.54	0.00269629
2794.47	0.0057398		2794.47	0.0049747		2794.47	0.00403938		2794.47	0.00358752		2794.47	0.002744
2796.39	0.00585326		2796.39	0.00506296		2796.39	0.00412353		2796.39	0.00366938		2796.39	0.00280882
2798.32	0.00595584		2798.32	0.00515539		2798.32	0.00417321		2798.32	0.00374935		2798.32	0.00287743
2800.25	0.00599545		2800.25	0.00517996		2800.25	0.00417541		2800.25	0.00377321		2800.25	0.0029295
2802.18	0.00603899		2802.18	0.00519723		2802.18	0.00418796		2802.18	0.00378628		2802.18	0.00295375
2804.11	0.00613768		2804.11	0.00528852		2804.11	0.00423015		2804.11	0.00385427		2804.11	0.0030079
2806.04	0.00630221		2806.04	0.00539207		2806.04	0.00428469		2806.04	0.00393056		2806.04	0.00311387
2807.97	0.00647618		2807.97	0.00553111		2807.97	0.00442412		2807.97	0.0040365		2807.97	0.00322932
2809.89	0.00661346		2809.89	0.00568038		2809.89	0.00455753		2809.89	0.0042004		2809.89	0.00332344
2811.82	0.00671466		2811.82	0.00574709		2811.82	0.00458368		2811.82	0.00428713		2811.82	0.00338604
2813.75	0.00683572		2813.75	0.00580773		2813.75	0.00464064		2813.75	0.00433378		2813.75	0.00348814
2815.68	0.0069756		2815.68	0.00589588		2815.68	0.00475576		2815.68	0.00444684		2815.68	0.00360509
2817.61	0.00713435		2817.61	0.00601628		2817.61	0.00486424		2817.61	0.00458602		2817.61	0.00374708
2819.54	0.00733784		2819.54	0.00619535		2819.54	0.00499394		2819.54	0.00473677		2819.54	0.00390596
2821.47	0.00756496		2821.47	0.00636706		2821.47	0.00513141		2821.47	0.00487865		2821.47	0.00404901
2823.39	0.00782203		2823.39	0.0065153		2823.39	0.00529888		2823.39	0.00505012		2823.39	0.00422657
2825.32	0.00805872		2825.32	0.00667614		2825.32	0.00546991		2825.32	0.00521383		2825.32	0.00443007
2827.25	0.00834113		2827.25	0.00686528		2827.25	0.00563362		2827.25	0.00541086		2827.25	0.00468009
2829.18	0.00867301		2829.18	0.0070837		2829.18	0.00583479		2829.18	0.00567917		2829.18	0.00494759
2831.11	0.00905085		2831.11	0.00734684		2831.11	0.00609812		2831.11	0.00597657		2831.11	0.00525706
2833.04	0.00951968		2833.04	0.00764141		2833.04	0.00640751		2833.04	0.0063214		2833.04	0.00559646
2834.97	0.0100914		2834.97	0.00797343		2834.97	0.00674189		2834.97	0.00670894		2834.97	0.00602924
2836.89	0.0108121		2836.89	0.00843646		2836.89	0.00719276		2836.89	0.00723049		2836.89	0.00662974
2838.82	0.0116813		2838.82	0.00904628		2838.82	0.0078313		2838.82	0.00793793		2838.82	0.00733373
2840.75	0.012736		2840.75	0.0097703		2840.75	0.00864932		2840.75	0.00884882		2840.75	0.00822212
2842.68	0.0142481		2842.68	0.0107779		2842.68	0.00977698		2842.68	0.010263		2842.68	0.00946894
2844.61	0.0164889		2844.61	0.012366		2844.61	0.011542		2844.61	0.0125723		2844.61	0.011228
2846.54	0.019537		2846.54	0.0146389		2846.54	0.0140722		2846.54	0.0159915		2846.54	0.0135512
2848.47	0.0226055		2848.47	0.0166695		2848.47	0.0165424		2848.47	0.0194933		2848.47	0.0159139
2850.39	0.0243001		2850.39	0.0170709		2850.39	0.0174603		2850.39	0.0208863		2850.39	0.0173226
2852.32	0.0243727		2852.32	0.0160991		2852.32	0.0166118		2852.32	0.0198463		2852.32	0.0174804
2854.25	0.0235584		2854.25	0.0149355		2854.25	0.0150922		2854.25	0.0179541		2854.25	0.0168428
2856.18	0.0223208		2856.18	0.0140032		2856.18	0.0137607		2856.18	0.0161311		2856.18	0.0157705
2858.11	0.0209479		2858.11	0.0132815		2858.11	0.0127791		2858.11	0.0145794		2858.11	0.0145538
2860.04	0.019607		2860.04	0.012767		2860.04	0.0120003		2860.04	0.0133197		2860.04	0.0134284
2861.97	0.0184233		2861.97	0.0123812		2861.97	0.0113826		2861.97	0.0123827		2861.97	0.0124985
2863.89	0.0175984		2863.89	0.0121847		2863.89	0.0109923		2863.89	0.0118045		2863.89	0.011831
2865.82	0.0171097		2865.82	0.0121363		2865.82	0.0108271		2865.82	0.0114955		2865.82	0.0113996
2867.75	0.0168457		2867.75	0.0121618		2867.75	0.0107765		2867.75	0.0113274		2867.75	0.0111651
2869.68	0.016659		2869.68	0.0122083		2869.68	0.0107483		2869.68	0.0112291		2869.68	0.0109826
2871.61	0.0165242		2871.61	0.012255		2871.61	0.0107225		2871.61	0.0111674		2871.61	0.0108158
2873.54	0.0163857		2873.54	0.0122633		2873.54	0.0106498		2873.54	0.0110715		2873.54	0.0106967
2875.47	0.0161923		2875.47	0.0121811		2875.47	0.0105671		2875.47	0.0109132		2875.47	0.010566
2877.39	0.016086		2877.39	0.0120892		2877.39	0.0105119		2877.39	0.0108273		2877.39	0.0104532
2879.32	0.0161112		2879.32	0.0120808		2879.32	0.0104767		2879.32	0.0108862		2879.32	0.010424
2881.25	0.0162437		2881.25	0.012163		2881.25	0.0105295		2881.25	0.0110191		2881.25	0.0105201
2883.18	0.0165066		2883.18	0.0123199		2883.18	0.0107285		2883.18	0.0112364		2883.18	0.0107304
2885.11	0.0168778		2885.11	0.0125407		2885.11	0.0110315		2885.11	0.0115552		2885.11	0.0109867
2887.04	0.0173302		2887.04	0.012793		2887.04	0.0113544		2887.04	0.011914		2887.04	0.0113266
2888.97	0.0178968		2888.97	0.0131297		2888.97	0.0116714		2888.97	0.0123019		2888.97	0.0117905
2890.89	0.018571		2890.89	0.0135134		2890.89	0.0120193		2890.89	0.0127427		2890.89	0.0123304
2892.82	0.0192729		2892.82	0.0138622		2892.82	0.01243		2892.82	0.0132537		2892.82	0.0128699
2894.75	0.0199812		2894.75	0.0142313		2894.75	0.0128785		2894.75	0.0137861		2894.75	0.0134052
2896.68	0.0206953		2896.68	0.0146207		2896.68	0.0133144		2896.68	0.0142814		2896.68	0.0139509
2898.61	0.021429		2898.61	0.0150097		2898.61	0.013757		2898.61	0.0148126		2898.61	0.0145313
2900.54	0.0222457		2900.54	0.0154311		2900.54	0.0142458		2900.54	0.0154539		2900.54	0.0151696
2902.47	0.0231796		2902.47	0.0159679		2902.47	0.0148557		2902.47	0.0161555		2902.47	0.0158926
2904.39	0.0241806		2904.39	0.0166127		2904.39	0.0155555		2904.39	0.0169375		2904.39	0.0167065
2906.32	0.0253031		2906.32	0.0173049		2906.32	0.0164024		2906.32	0.0179158		2906.32	0.0175817
2908.25	0.0267213		2908.25	0.0181674		2908.25	0.0174791		2908.25	0.0192543		2908.25	0.0186214
2910.18	0.0285811		2910.18	0.0194718		2910.18	0.0189717		2910.18	0.0212863		2910.18	0.0200114
2912.11	0.0310814		2912.11	0.0213808		2912.11	0.0211724		2912.11	0.0243914		2912.11	0.0218758
2914.04	0.034077		2914.04	0.023679		2914.04	0.0238149		2914.04	0.0281883		2914.04	0.0240864
2915.97	0.0366563		2915.97	0.0253236		2915.97	0.0257762		2915.97	0.0310692		2915.97	0.0260159
2917.89	0.0380642		2917.89	0.025551		2917.89	0.0261746		2917.89	0.0318621		2917.89	0.027107
2919.82	0.0386241		2919.82	0.0248419		2919.82	0.0254974		2919.82	0.0311797		2919.82	0.0276056
2921.75	0.0388695		2921.75	0.0239462		2921.75	0.0246022		2921.75	0.0300585		2921.75	0.0278163
2923.68	0.0388266		2923.68	0.0231134		2923.68	0.0236878		2923.68	0.0288816		2923.68	0.027719
2925.61	0.0383559		2925.61	0.0223212		2925.61	0.0227783		2925.61	0.0276783		2925.61	0.0272772
2927.54	0.037582		2927.54	0.0216004		2927.54	0.0219115		2927.54	0.026456		2927.54	0.0265647
2929.46	0.0366124		2929.46	0.0209493		2929.46	0.02106		2929.46	0.0252324		2929.46	0.0256916
2931.39	0.0354226		2931.39	0.0202911		2931.39	0.0202379		2931.39	0.0240095		2931.39	0.0246708
2933.32	0.0341012		2933.32	0.0196662		2933.32	0.0194508		2933.32	0.0228194		2933.32	0.0235523
2935.25	0.0327255		2935.25	0.0191563		2935.25	0.0186774		2935.25	0.0216164		2935.25	0.0224173
2937.18	0.0314506		2937.18	0.0187163		2937.18	0.0179909		2937.18	0.0204654		2937.18	0.021383
2939.11	0.030292		2939.11	0.0182873		2939.11	0.0174318		2939.11	0.0194391		2939.11	0.0204402
2941.04	0.0292785		2941.04	0.0179337		2941.04	0.0169508		2941.04	0.0185375		2941.04	0.0196087
2942.96	0.0284081		2942.96	0.0176357		2942.96	0.0165495		2942.96	0.0178372		2942.96	0.0188855
2944.89	0.0276372		2944.89	0.0173399		2944.89	0.0162321		2944.89	0.017305		2944.89	0.0182753
2946.82	0.0270164		2946.82	0.0170757		2946.82	0.0159197		2946.82	0.0169079		2946.82	0.0177884
2948.75	0.0265072		2948.75	0.0168996		2948.75	0.0156543		2948.75	0.016654		2948.75	0.0173606
2950.68	0.0260372		2950.68	0.0167112		2950.68	0.0154229		2950.68	0.0165318		2950.68	0.0169104
2952.61	0.0255635		2952.61	0.0164454		2952.61	0.0151875		2952.61	0.0164919		2952.61	0.0164855
2954.54	0.0250672		2954.54	0.0161661		2954.54	0.014938		2954.54	0.0164422		2954.54	0.016109
2956.46	0.0245737		2956.46	0.0158551		2956.46	0.0146585		2956.46	0.0162999		2956.46	0.015708
2958.39	0.024044		2958.39	0.0155005		2958.39	0.0143638		2958.39	0.0160226		2958.39	0.0152709
2960.32	0.0235384		2960.32	0.0151503		2960.32	0.0140721		2960.32	0.0156745		2960.32	0.0148634
2962.25	0.0231095		2962.25	0.0148739		2962.25	0.0137879		2962.25	0.0152703		2962.25	0.0144575
2964.18	0.0226916		2964.18	0.0146525		2964.18	0.0135422		2964.18	0.0147984		2964.18	0.0140521
2966.11	0.0222862		2966.11	0.0143778		2966.11	0.0132959		2966.11	0.0142834		2966.11	0.0136998
2968.03	0.0219391		2968.03	0.0140661		2968.03	0.0130169		2968.03	0.0137839		2968.03	0.0133991
2969.96	0.0216154		2969.96	0.0137806		2969.96	0.0127437		2969.96	0.0133213		2969.96	0.0130836
2971.89	0.0212492		2971.89	0.0135087		2971.89	0.0124702		2971.89	0.0129003		2971.89	0.0127476
2973.82	0.0208813		2973.82	0.0132142		2973.82	0.0122326		2973.82	0.0125383		2973.82	0.0124046
2975.75	0.0205699		2975.75	0.0129314		2975.75	0.0120321		2975.75	0.0122192		2975.75	0.0120752
2977.68	0.020314		2977.68	0.012689		2977.68	0.0118328		2977.68	0.0119465		2977.68	0.011806
2979.61	0.020064		2979.61	0.0124497		2979.61	0.0116757		2979.61	0.0117336		2979.61	0.0115763
2981.53	0.0198526		2981.53	0.0122174		2981.53	0.0115369		2981.53	0.0115631		2981.53	0.0113788
2983.46	0.0196567		2983.46	0.0119939		2983.46	0.0113678		2983.46	0.0113768		2983.46	0.0111908
2985.39	0.0194787		2985.39	0.011742		2985.39	0.0111963		2985.39	0.0111987		2985.39	0.0109965
2987.32	0.0193705		2987.32	0.0115177		2987.32	0.0110716		2987.32	0.0111041		2987.32	0.0108539
2989.25	0.0193038		2989.25	0.0113647		2989.25	0.0110061		2989.25	0.01109		2989.25	0.0107522
2991.18	0.0193166		2991.18	0.0112378		2991.18	0.0109708		2991.18	0.0111225		2991.18	0.0106695
2993.11	0.0193773		2993.11	0.0111023		2993.11	0.0109382		2993.11	0.0111678		2993.11	0.0106616
2995.03	0.0194777		2995.03	0.0110312		2995.03	0.0109131		2995.03	0.0112223		2995.03	0.0107235
2996.96	0.0196753		2996.96	0.0110295		2996.96	0.0108796		2996.96	0.0112995		2996.96	0.0108138
2998.89	0.0199226		2998.89	0.0110002		2998.89	0.0108597		2998.89	0.0114265		2998.89	0.0109572
3000.82	0.0202005		3000.82	0.0109753		3000.82	0.0109219		3000.82	0.0116215		3000.82	0.0111399
3002.75	0.020528		3002.75	0.0109651		3002.75	0.011008		3002.75	0.0117912		3002.75	0.0113111
3004.68	0.0208742		3004.68	0.0109595		3004.68	0.0110552		3004.68	0.0118865		3004.68	0.0114962
3006.61	0.0211708		3006.61	0.0109607		3006.61	0.011121		3006.61	0.0119791		3006.61	0.01168
3008.53	0.0213837		3008.53	0.0109869		3008.53	0.011184		3008.53	0.0120858		3008.53	0.0117646
3010.46	0.0214932		3010.46	0.0110191		3010.46	0.0111809		3010.46	0.0122358		3010.46	0.0117127
3012.39	0.0215126		3012.39	0.0110359		3012.39	0.0111713		3012.39	0.0123698		3012.39	0.0116131
3014.32	0.0214638		3014.32	0.0110057		3014.32	0.0111963		3014.32	0.0124474		3014.32	0.0115486
3016.25	0.0213878		3016.25	0.0109528		3016.25	0.0112201		3016.25	0.0125147		3016.25	0.0114875
3018.18	0.0213092		3018.18	0.0109381		3018.18	0.0112662		3018.18	0.0125997		3018.18	0.0113822
3020.11	0.0212384		3020.11	0.0109486		3020.11	0.0113113		3020.11	0.0127199		3020.11	0.0112922
3022.03	0.0212401		3022.03	0.0109648		3022.03	0.0113728		3022.03	0.0127964		3022.03	0.0112396
3023.96	0.0213403		3023.96	0.0109745		3023.96	0.01145		3023.96	0.0129093		3023.96	0.0112091
3025.89	0.0214694		3025.89	0.0110147		3025.89	0.0115243		3025.89	0.0130632		3025.89	0.0112524
3027.82	0.0216405		3027.82	0.0110933		3027.82	0.0116278		3027.82	0.01322		3027.82	0.0113325
3029.75	0.0218471		3029.75	0.0111424		3029.75	0.0117337		3029.75	0.0133953		3029.75	0.0113634
3031.68	0.0220699		3031.68	0.0111977		3031.68	0.0118363		3031.68	0.0136083		3031.68	0.0114028
3033.61	0.0223486		3033.61	0.0113104		3033.61	0.0119829		3033.61	0.0138186		3033.61	0.0115601
3035.53	0.0226178		3035.53	0.0114297		3035.53	0.0121409		3035.53	0.0140008		3035.53	0.0117607
3037.46	0.0229269		3037.46	0.0115131		3037.46	0.0123368		3037.46	0.0142014		3037.46	0.011987
3039.39	0.0232938		3039.39	0.0116081		3039.39	0.012528		3039.39	0.0144205		3039.39	0.0122128
3041.32	0.0236628		3041.32	0.0117422		3041.32	0.0126597		3041.32	0.0146365		3041.32	0.0124045
3043.25	0.0240098		3043.25	0.0118704		3043.25	0.0127852		3043.25	0.0148461		3043.25	0.0125963
3045.18	0.024332		3045.18	0.0119907		3045.18	0.0129663		3045.18	0.0150366		3045.18	0.0127749
3047.11	0.0246599		3047.11	0.012096		3047.11	0.0131385		3047.11	0.0152405		3047.11	0.0129531
3049.03	0.0250283		3049.03	0.0122371		3049.03	0.0132865		3049.03	0.0154649		3049.03	0.0131298
3050.96	0.0253804		3050.96	0.0124045		3050.96	0.0134684		3050.96	0.0157223		3050.96	0.0133253
3052.89	0.0257558		3052.89	0.0124991		3052.89	0.0136833		3052.89	0.0159906		3052.89	0.0135566
3054.82	0.0261292		3054.82	0.0126155		3054.82	0.0138245		3054.82	0.0162282		3054.82	0.0137479
3056.75	0.0265196		3056.75	0.0127723		3056.75	0.0139724		3056.75	0.0164321		3056.75	0.0139611
3058.68	0.0269295		3058.68	0.0129004		3058.68	0.0142057		3058.68	0.0166326		3058.68	0.014248
3060.61	0.027355		3060.61	0.0130464		3060.61	0.0144853		3060.61	0.016881		3060.61	0.014535
3062.53	0.0277577		3062.53	0.013193		3062.53	0.0146843		3062.53	0.0171602		3062.53	0.0147417
3064.46	0.0281198		3064.46	0.0132981		3064.46	0.0147897		3064.46	0.0174237		3064.46	0.0148481
3066.39	0.0285376		3066.39	0.0134284		3066.39	0.0149335		3066.39	0.0176565		3066.39	0.0150796
3068.32	0.0290107		3068.32	0.0135786		3068.32	0.0151494		3068.32	0.0179141		3068.32	0.0154451
3070.25	0.0294651		3070.25	0.0137136		3070.25	0.0154251		3070.25	0.0182042		3070.25	0.0158078
3072.18	0.0298944		3072.18	0.0138105		3072.18	0.0156272		3072.18	0.0184809		3072.18	0.0160694
3074.11	0.0303293		3074.11	0.0139513		3074.11	0.0158		3074.11	0.0187032		3074.11	0.0162639
3076.03	0.0307621		3076.03	0.0141207		3076.03	0.0160006		3076.03	0.0189709		3076.03	0.0164645
3077.96	0.0311663		3077.96	0.0142249		3077.96	0.0161753		3077.96	0.01926		3077.96	0.0166066
3079.89	0.0316072		3079.89	0.0143502		3079.89	0.0163807		3079.89	0.01954		3079.89	0.0168231
3081.82	0.0320707		3081.82	0.0144775		3081.82	0.0166161		3081.82	0.0198086		3081.82	0.0171334
3083.75	0.0325268		3083.75	0.0145936		3083.75	0.0168327		3083.75	0.0200844		3083.75	0.0174029
3085.68	0.0330076		3085.68	0.0147461		3085.68	0.017047		3085.68	0.0203402		3085.68	0.0177047
3087.61	0.0335263		3087.61	0.0148772		3087.61	0.0172666		3087.61	0.0205827		3087.61	0.0180282
3089.53	0.0339761		3089.53	0.0150106		3089.53	0.0174857		3089.53	0.0208515		3089.53	0.0183053
3091.46	0.0343984		3091.46	0.0151351		3091.46	0.0177108		3091.46	0.0210886		3091.46	0.0185797
3093.39	0.0348429		3093.39	0.0151964		3093.39	0.0179239		3093.39	0.0212938		3093.39	0.0188142
3095.32	0.0352909		3095.32	0.0153147		3095.32	0.0181383		3095.32	0.0215342		3095.32	0.019007
3097.25	0.0357857		3097.25	0.0154815		3097.25	0.0184024		3097.25	0.0218149		3097.25	0.0192873
3099.18	0.03629		3099.18	0.0156404		3099.18	0.0186331		3099.18	0.0221331		3099.18	0.0195643
3101.11	0.036799		3101.11	0.0157572		3101.11	0.0188181		3101.11	0.0224279		3101.11	0.0198433
3103.03	0.0373633		3103.03	0.0159187		3103.03	0.0190818		3103.03	0.0227095		3103.03	0.020228
3104.96	0.0379128		3104.96	0.0160643		3104.96	0.0193572		3104.96	0.02298		3104.96	0.0205928
3106.89	0.0384141		3106.89	0.0162028		3106.89	0.0195978		3106.89	0.0233121		3106.89	0.0208877
3108.82	0.038902		3108.82	0.0163696		3108.82	0.0198407		3108.82	0.0236903		3108.82	0.0211943
3110.75	0.0394715		3110.75	0.0165444		3110.75	0.0200723		3110.75	0.0240106		3110.75	0.0215417
3112.68	0.0400103		3112.68	0.0167174		3112.68	0.0202962		3112.68	0.0242928		3112.68	0.0218691
3114.61	0.0405227		3114.61	0.0168404		3114.61	0.020529		3114.61	0.0245853		3114.61	0.0221142
3116.53	0.0410238		3116.53	0.0169901		3116.53	0.020745		3116.53	0.0248878		3116.53	0.0223715
3118.46	0.041618		3118.46	0.0171849		3118.46	0.0210173		3118.46	0.025195		3118.46	0.0227397
3120.39	0.0422155		3120.39	0.0173313		3120.39	0.0213028		3120.39	0.0254902		3120.39	0.0231299
3122.32	0.0427483		3122.32	0.017469		3122.32	0.0215941		3122.32	0.0258049		3122.32	0.0234683
3124.25	0.0432794		3124.25	0.0176205		3124.25	0.0218656		3124.25	0.0261825		3124.25	0.0237687
3126.18	0.0438695		3126.18	0.0178198		3126.18	0.0221062		3126.18	0.0265721		3126.18	0.0240876
3128.11	0.0444748		3128.11	0.0180084		3128.11	0.0223679		3128.11	0.0268988		3128.11	0.0244571
3130.03	0.0451059		3130.03	0.0182035		3130.03	0.0226491		3130.03	0.0272124		3130.03	0.0248631
3131.96	0.045667		3131.96	0.018353		3131.96	0.0229038		3131.96	0.0275573		3131.96	0.0251822
3133.89	0.046253		3133.89	0.0185077		3133.89	0.0231953		3133.89	0.0279191		3133.89	0.0255267
3135.82	0.0468465		3135.82	0.0187005		3135.82	0.0235079		3135.82	0.0282731		3135.82	0.0259295
3137.75	0.0474289		3137.75	0.0189525		3137.75	0.0237917		3137.75	0.0286422		3137.75	0.0262927
3139.68	0.0480341		3139.68	0.0191665		3139.68	0.0240311		3139.68	0.0289661		3139.68	0.0266449
3141.61	0.0486993		3141.61	0.0193327		3141.61	0.0243235		3141.61	0.029288		3141.61	0.0270296
3143.53	0.0493017		3143.53	0.0195083		3143.53	0.0246413		3143.53	0.0296896		3143.53	0.0273716
3145.46	0.0498994		3145.46	0.0197026		3145.46	0.0249229		3145.46	0.0300876		3145.46	0.0277116
3147.39	0.0505032		3147.39	0.0198797		3147.39	0.0251916		3147.39	0.030419		3147.39	0.0280835
3149.32	0.0510555		3149.32	0.020063		3149.32	0.0255004		3149.32	0.0308102		3149.32	0.0284539
3151.25	0.05161		3151.25	0.0202826		3151.25	0.0258236		3151.25	0.0312155		3151.25	0.0287997
3153.18	0.0522419		3153.18	0.0205238		3153.18	0.0261286		3153.18	0.0315459		3153.18	0.029177
3155.1	0.0528556		3155.1	0.0206902		3155.1	0.0263472		3155.1	0.0318626		3155.1	0.0295671
3157.03	0.0534954		3157.03	0.0208464		3157.03	0.026584		3157.03	0.0322384		3157.03	0.0299281
3158.96	0.0540938		3158.96	0.0209882		3158.96	0.0268923		3158.96	0.032581		3158.96	0.0302678
3160.89	0.0547127		3160.89	0.0211539		3160.89	0.0272185		3160.89	0.0329599		3160.89	0.0306705
3162.82	0.0553403		3162.82	0.0213492		3162.82	0.0274744		3162.82	0.0333427		3162.82	0.031071
3164.75	0.0559378		3164.75	0.0215876		3164.75	0.0277654		3164.75	0.0337235		3164.75	0.0313948
3166.68	0.056506		3166.68	0.0218348		3166.68	0.0280427		3166.68	0.0340972		3166.68	0.031692
3168.6	0.0571097		3168.6	0.0220401		3168.6	0.0283192		3168.6	0.0344286		3168.6	0.0320443
3170.53	0.057728		3170.53	0.0221703		3170.53	0.0285912		3170.53	0.0347309		3170.53	0.0324568
3172.46	0.0583274		3172.46	0.0223477		3172.46	0.0288543		3172.46	0.0350846		3172.46	0.032912
3174.39	0.0588843		3174.39	0.0225256		3174.39	0.0291291		3174.39	0.0354723		3174.39	0.0332843
3176.32	0.0594585		3176.32	0.022686		3176.32	0.0294372		3176.32	0.0358404		3176.32	0.0335351
3178.25	0.0599868		3178.25	0.0228816		3178.25	0.0296907		3178.25	0.03616		3178.25	0.0337585
3180.18	0.0605728		3180.18	0.0231613		3180.18	0.0299624		3180.18	0.0364906		3180.18	0.0341465
3182.1	0.0611275		3182.1	0.0234125		3182.1	0.0302299		3182.1	0.0368235		3182.1	0.0345462
3184.03	0.0616734		3184.03	0.0235811		3184.03	0.0304977		3184.03	0.0371738		3184.03	0.0348863
3185.96	0.062239		3185.96	0.0236858		3185.96	0.0307612		3185.96	0.037494		3185.96	0.0352215
3187.89	0.0628256		3187.89	0.0238821		3187.89	0.0310457		3187.89	0.037848		3187.89	0.0356033
3189.82	0.063306		3189.82	0.0241001		3189.82	0.0312924		3189.82	0.0381812		3189.82	0.0359081
3191.75	0.0638787		3191.75	0.0242827		3191.75	0.0315606		3191.75	0.0385141		3191.75	0.0362722
3193.68	0.0644903		3193.68	0.0244357		3193.68	0.0318079		3193.68	0.038837		3193.68	0.0366384
3195.6	0.0649951		3195.6	0.0245694		3195.6	0.0320246		3195.6	0.0391201		3195.6	0.0369296
3197.53	0.0654138		3197.53	0.0247119		3197.53	0.0322052		3197.53	0.0393676		3197.53	0.0371361
3199.46	0.0659104		3199.46	0.0249409		3199.46	0.032453		3199.46	0.0396653		3199.46	0.0374489
3201.39	0.0663423		3201.39	0.0251874		3201.39	0.0327365		3201.39	0.0399876		3201.39	0.0377965
3203.32	0.0668175		3203.32	0.0254003		3203.32	0.0329747		3203.32	0.0403259		3203.32	0.0381757
3205.25	0.0673163		3205.25	0.0255231		3205.25	0.0331883		3205.25	0.0406129		3205.25	0.0384804
3207.18	0.0678211		3207.18	0.0256091		3207.18	0.0333912		3207.18	0.0408842		3207.18	0.0387073
3209.1	0.0682782		3209.1	0.0257321		3209.1	0.0335994		3209.1	0.0411512		3209.1	0.0389284
3211.03	0.0687414		3211.03	0.0259235		3211.03	0.0338105		3211.03	0.0414325		3211.03	0.0392633
3212.96	0.0691209		3212.96	0.0260262		3212.96	0.0339689		3212.96	0.0416958		3212.96	0.0395095
3214.89	0.0695418		3214.89	0.0261616		3214.89	0.0342071		3214.89	0.0419457		3214.89	0.0397688
3216.82	0.0699432		3216.82	0.0263411		3216.82	0.0344399		3216.82	0.0422013		3216.82	0.040096
3218.75	0.0703308		3218.75	0.0264731		3218.75	0.0346145		3218.75	0.0424753		3218.75	0.0403112
3220.68	0.0706811		3220.68	0.0265632		3220.68	0.0347982		3220.68	0.0426808		3220.68	0.0404947
3222.6	0.0710655		3222.6	0.0267378		3222.6	0.0350377		3222.6	0.0428707		3222.6	0.040765
3224.53	0.0713956		3224.53	0.026892		3224.53	0.0352326		3224.53	0.043058		3224.53	0.041015
3226.46	0.0717388		3226.46	0.0269945		3226.46	0.0353736		3226.46	0.0432996		3226.46	0.0412614
3228.39	0.0720659		3228.39	0.0271197		3228.39	0.0354719		3228.39	0.043554		3228.39	0.041453
3230.32	0.0723643		3230.32	0.0272871		3230.32	0.0356324		3230.32	0.0437865		3230.32	0.0416112
3232.25	0.0726109		3232.25	0.0274631		3232.25	0.0358037		3232.25	0.0439919		3232.25	0.0417728
3234.18	0.0729562		3234.18	0.0276185		3234.18	0.0359938		3234.18	0.044173		3234.18	0.0420167
3236.1	0.0732459		3236.1	0.0276892		3236.1	0.0361469		3236.1	0.0442869		3236.1	0.04222
3238.03	0.0735184		3238.03	0.0277839		3238.03	0.0362711		3238.03	0.0444356		3238.03	0.0424049
3239.96	0.0737753		3239.96	0.0279511		3239.96	0.0363835		3239.96	0.0445921		3239.96	0.0425809
3241.89	0.0740367		3241.89	0.0280966		3241.89	0.0365316		3241.89	0.0447987		3241.89	0.0427808
3243.82	0.0742249		3243.82	0.0281733		3243.82	0.0366372		3243.82	0.0449728		3243.82	0.0428963
3245.75	0.0744826		3245.75	0.0283068		3245.75	0.0367753		3245.75	0.0451871		3245.75	0.0430403
3247.68	0.0747062		3247.68	0.0284611		3247.68	0.0369693		3247.68	0.0453456		3247.68	0.0432804
3249.6	0.0749719		3249.6	0.0285559		3249.6	0.037103		3249.6	0.0454591		3249.6	0.0434814
3251.53	0.0751894		3251.53	0.028672		3251.53	0.0372029		3251.53	0.0455615		3251.53	0.0435598
3253.46	0.0753677		3253.46	0.0288419		3253.46	0.0373173		3253.46	0.0456772		3253.46	0.0436088
3255.39	0.0755225		3255.39	0.0290334		3255.39	0.0373462		3255.39	0.0458522		3255.39	0.0437505
3257.32	0.0757317		3257.32	0.0291797		3257.32	0.0374246		3257.32	0.0460075		3257.32	0.0439898
3259.25	0.0759069		3259.25	0.029241		3259.25	0.037562		3259.25	0.0461069		3259.25	0.0441358
3261.18	0.0761093		3261.18	0.029319		3261.18	0.0376792		3261.18	0.0462486		3261.18	0.0442207
3263.1	0.0762912		3263.1	0.0294129		3263.1	0.0377433		3263.1	0.0463431		3263.1	0.0443254
3265.03	0.0764272		3265.03	0.0295538		3265.03	0.0378374		3265.03	0.0464895		3265.03	0.0444244
3266.96	0.0765054		3266.96	0.0297033		3266.96	0.0379713		3266.96	0.0466377		3266.96	0.04452
3268.89	0.0766459		3268.89	0.0298586		3268.89	0.0380866		3268.89	0.0467888		3268.89	0.0446302
3270.82	0.076746		3270.82	0.0300162		3270.82	0.0381258		3270.82	0.0468755		3270.82	0.044686
3272.75	0.0768903		3272.75	0.0301243		3272.75	0.0382109		3272.75	0.0469255		3272.75	0.0447449
3274.68	0.0770064		3274.68	0.0302028		3274.68	0.0382829		3274.68	0.047031		3274.68	0.0447968
3276.6	0.0771728		3276.6	0.0303027		3276.6	0.0383514		3276.6	0.0471541		3276.6	0.0449386
3278.53	0.0772951		3278.53	0.0303931		3278.53	0.0384349		3278.53	0.047209		3278.53	0.0451137
3280.46	0.0774783		3280.46	0.0304887		3280.46	0.0385149		3280.46	0.0472873		3280.46	0.0453141
3282.39	0.0775724		3282.39	0.0305209		3282.39	0.0385525		3282.39	0.0472976		3282.39	0.0453988
3284.32	0.0777126		3284.32	0.0305594		3284.32	0.0386059		3284.32	0.0473537		3284.32	0.0455462
3286.25	0.0778189		3286.25	0.030623		3286.25	0.0386924		3286.25	0.047432		3286.25	0.0456662
3288.17	0.0779194		3288.17	0.0307393		3288.17	0.0387473		3288.17	0.0474694		3288.17	0.0456814
3290.1	0.077902		3290.1	0.0308534		3290.1	0.0387029		3290.1	0.0475331		3290.1	0.0456391
3292.03	0.0779371		3292.03	0.0309236		3292.03	0.0386987		3292.03	0.0476379		3292.03	0.0456618
3293.96	0.0780569		3293.96	0.0309551		3293.96	0.0387549		3293.96	0.0476562		3293.96	0.0457671
3295.89	0.0781747		3295.89	0.0309578		3295.89	0.0388142		3295.89	0.0476673		3295.89	0.0458856
3297.82	0.0781906		3297.82	0.0309097		3297.82	0.0388883		3297.82	0.0476398		3297.82	0.0459405
3299.75	0.0783196		3299.75	0.0309512		3299.75	0.0390449		3299.75	0.047646		3299.75	0.0460713
3301.67	0.0784041		3301.67	0.0309935		3301.67	0.0390581		3301.67	0.0476456		3301.67	0.0461526
3303.6	0.0784565		3303.6	0.0310446		3303.6	0.0389737		3303.6	0.0477202		3303.6	0.0461377
3305.53	0.0784633		3305.53	0.0310841		3305.53	0.0389022		3305.53	0.0477774		3305.53	0.046124
3307.46	0.0784936		3307.46	0.0310322		3307.46	0.0389287		3307.46	0.0477917		3307.46	0.0461328
3309.39	0.0785282		3309.39	0.0309473		3309.39	0.0390131		3309.39	0.0477684		3309.39	0.0461604
3311.32	0.0786498		3311.32	0.0309656		3311.32	0.0390706		3311.32	0.0477504		3311.32	0.0463053
3313.24	0.0787009		3313.24	0.0309542		3313.24	0.0391013		3313.24	0.047739		3313.24	0.0464302
3315.17	0.0788456		3315.17	0.0309958		3315.17	0.0392756		3315.17	0.0478258		3315.17	0.0465983
3317.1	0.0789379		3317.1	0.031042		3317.1	0.0394182		3317.1	0.0478821		3317.1	0.0466605
3319.03	0.0789978		3319.03	0.0310668		3319.03	0.0394966		3319.03	0.0478661		3319.03	0.0466952
3320.96	0.0790667		3320.96	0.0310701		3320.96	0.0394755		3320.96	0.0478645		3320.96	0.0468149
3322.89	0.0791705		3322.89	0.0310551		3322.89	0.0394085		3322.89	0.0479765		3322.89	0.046942
3324.82	0.0791351		3324.82	0.0310294		3324.82	0.0393794		3324.82	0.0480101		3324.82	0.0468981
3326.74	0.0791914		3326.74	0.0310708		3326.74	0.0394827		3326.74	0.0480431		3326.74	0.0468774
3328.67	0.079355		3328.67	0.0311244		3328.67	0.0396056		3328.67	0.0480968		3328.67	0.0470297
3330.6	0.0795533		3330.6	0.0311906		3330.6	0.0396954		3330.6	0.0481854		3330.6	0.0472425
3332.53	0.0796184		3332.53	0.0312145		3332.53	0.0397205		3332.53	0.0481936		3332.53	0.047323
3334.46	0.0795924		3334.46	0.0312283		3334.46	0.0397876		3334.46	0.0481852		3334.46	0.0473016
3336.39	0.0795084		3336.39	0.0311808		3336.39	0.0397342		3336.39	0.0481484		3336.39	0.0472174
3338.32	0.0795795		3338.32	0.0311985		3338.32	0.0397267		3338.32	0.0481703		3338.32	0.0472945
3340.24	0.0797352		3340.24	0.0312772		3340.24	0.0397935		3340.24	0.0482244		3340.24	0.0474345
3342.17	0.0798256		3342.17	0.0312793		3342.17	0.0398331		3342.17	0.0483244		3342.17	0.0475219
3344.1	0.0798476		3344.1	0.0312359		3344.1	0.0398594		3344.1	0.0483738		3344.1	0.0476062
3346.03	0.0800008		3346.03	0.0312731		3346.03	0.0399223		3346.03	0.0484011		3346.03	0.0477295
3347.96	0.0799449		3347.96	0.0312659		3347.96	0.0399343		3347.96	0.0483742		3347.96	0.0477216
3349.89	0.0798052		3349.89	0.03122		3349.89	0.0398657		3349.89	0.0483412		3349.89	0.0476574
3351.82	0.0798025		3351.82	0.0311648		3351.82	0.039817		3351.82	0.0483328		3351.82	0.0476802
3353.74	0.0799625		3353.74	0.0311024		3353.74	0.0399141		3353.74	0.0484587		3353.74	0.0478122
3355.67	0.0799867		3355.67	0.0310566		3355.67	0.0399526		3355.67	0.0484729		3355.67	0.0478168
3357.6	0.0799542		3357.6	0.0310687		3357.6	0.0399065		3357.6	0.0483791		3357.6	0.0478312
3359.53	0.0797999		3359.53	0.0309861		3359.53	0.0397954		3359.53	0.0483031		3359.53	0.0477699
3361.46	0.0797479		3361.46	0.03095		3361.46	0.0397843		3361.46	0.0483224		3361.46	0.047736
3363.39	0.0796395		3363.39	0.030911		3363.39	0.0398092		3363.39	0.048308		3363.39	0.047699
3365.32	0.0794598		3365.32	0.0308499		3365.32	0.0396825		3365.32	0.0481857		3365.32	0.047553
3367.24	0.0792118		3367.24	0.0307554		3367.24	0.0395077		3367.24	0.047983		3367.24	0.0474269
3369.17	0.0791182		3369.17	0.0306981		3369.17	0.0394896		3369.17	0.0479055		3369.17	0.0474538
3371.1	0.0791293		3371.1	0.0307258		3371.1	0.0394895		3371.1	0.0479649		3371.1	0.0475526
3373.03	0.0792072		3373.03	0.0307494		3373.03	0.0395407		3373.03	0.0480719		3373.03	0.0476737
3374.96	0.0790769		3374.96	0.0306624		3374.96	0.0394783		3374.96	0.0480433		3374.96	0.0476235
3376.89	0.0789117		3376.89	0.0305534		3376.89	0.0393825		3376.89	0.0479723		3376.89	0.0475702
3378.82	0.0787606		3378.82	0.0304096		3378.82	0.0393218		3378.82	0.047855		3378.82	0.047509
3380.74	0.07863		3380.74	0.030305		3380.74	0.0393347		3380.74	0.0478179		3380.74	0.0474548
3382.67	0.0784949		3382.67	0.0302389		3382.67	0.0392682		3382.67	0.0477909		3382.67	0.0474099
3384.6	0.0783237		3384.6	0.0301344		3384.6	0.0391218		3384.6	0.0477295		3384.6	0.0473119
3386.53	0.0780881		3386.53	0.0300878		3386.53	0.0389938		3386.53	0.0475879		3386.53	0.0472081
3388.46	0.077817		3388.46	0.0301019		3388.46	0.0389509		3388.46	0.0473795		3388.46	0.0470995
3390.39	0.0773269		3390.39	0.0299339		3390.39	0.0387061		3390.39	0.0470748		3390.39	0.0467549
3392.32	0.0769969		3392.32	0.0297184		3392.32	0.0384327		3392.32	0.046878		3392.32	0.0464744
3394.24	0.0768021		3394.24	0.0295857		3394.24	0.0383888		3394.24	0.046806		3394.24	0.0464294
3396.17	0.0766131		3396.17	0.0295346		3396.17	0.0383814		3396.17	0.0467447		3396.17	0.0463467
3398.1	0.0762032		3398.1	0.0294043		3398.1	0.0381673		3398.1	0.0464957		3398.1	0.0461526
3400.03	0.0757513		3400.03	0.0292386		3400.03	0.0379048		3400.03	0.0462295		3400.03	0.046001
3401.96	0.0754411		3401.96	0.0291131		3401.96	0.0377823		3401.96	0.0460968		3401.96	0.0458737
3403.89	0.0754319		3403.89	0.0291125		3403.89	0.0378087		3403.89	0.0460644		3403.89	0.0459028
3405.82	0.0752244		3405.82	0.0290593		3405.82	0.0377405		3405.82	0.0459877		3405.82	0.0458394
3407.74	0.0747936		3407.74	0.028875		3407.74	0.037534		3407.74	0.0457461		3407.74	0.0455796
3409.67	0.0742867		3409.67	0.0286947		3409.67	0.037304		3409.67	0.0454223		3409.67	0.0452782
3411.6	0.0738449		3411.6	0.0285392		3411.6	0.0371409		3411.6	0.0452515		3411.6	0.0450529
3413.53	0.0734792		3413.53	0.0284087		3413.53	0.0369408		3413.53	0.0450889		3413.53	0.0447981
3415.46	0.0732667		3415.46	0.0283786		3415.46	0.0368071		3415.46	0.04503		3415.46	0.0446864
3417.39	0.0728757		3417.39	0.028239		3417.39	0.0366122		3417.39	0.0448709		3417.39	0.0445531
3419.32	0.072351		3419.32	0.0279601		3419.32	0.0363399		3419.32	0.0445449		3419.32	0.04416
3421.24	0.0718863		3421.24	0.0276754		3421.24	0.0360819		3421.24	0.0442011		3421.24	0.0438228
3423.17	0.0716033		3423.17	0.0275689		3423.17	0.03593		3423.17	0.0439709		3423.17	0.0438197
3425.1	0.0711388		3425.1	0.0273743		3425.1	0.0357106		3425.1	0.0436979		3425.1	0.043622
3427.03	0.0705706		3427.03	0.0271625		3427.03	0.0354174		3427.03	0.0433824		3427.03	0.0432225
3428.96	0.0699508		3428.96	0.0269513		3428.96	0.0351044		3428.96	0.0430125		3428.96	0.0428786
3430.89	0.0694446		3430.89	0.0267355		3430.89	0.0348764		3430.89	0.0427008		3430.89	0.0426655
3432.82	0.0688928		3432.82	0.0265291		3432.82	0.0346373		3432.82	0.0424052		3432.82	0.0423939
3434.74	0.068326		3434.74	0.0263402		3434.74	0.0344259		3434.74	0.0421008		3434.74	0.0420552
3436.67	0.0677473		3436.67	0.0261219		3436.67	0.0342268		3436.67	0.0418422		3436.67	0.0417211
3438.6	0.0674842		3438.6	0.0259426		3438.6	0.0340726		3438.6	0.0416807		3438.6	0.0416168
3440.53	0.067239		3440.53	0.0257786		3440.53	0.03387		3440.53	0.0414367		3440.53	0.0414205
3442.46	0.066723		3442.46	0.0255944		3442.46	0.0335768		3442.46	0.0411898		3442.46	0.0410152
3444.39	0.0661508		3444.39	0.025343		3444.39	0.0332225		3444.39	0.0409304		3444.39	0.0406866
3446.32	0.0655587		3446.32	0.0250246		3446.32	0.0328298		3446.32	0.0405705		3446.32	0.0401674
3448.24	0.0649748		3448.24	0.0248602		3448.24	0.0326167		3448.24	0.0401991		3448.24	0.0398283
3450.17	0.0645825		3450.17	0.0248229		3450.17	0.0325923		3450.17	0.0400137		3450.17	0.0398702
3452.1	0.0640362		3452.1	0.0246975		3452.1	0.0323741		3452.1	0.0397609		3452.1	0.0396772
3454.03	0.0635106		3454.03	0.0244677		3454.03	0.0320942		3454.03	0.039426		3454.03	0.039367
3455.96	0.0629644		3455.96	0.0241817		3455.96	0.0317832		3455.96	0.0390819		3455.96	0.0389986
3457.89	0.0623842		3457.89	0.0239102		3457.89	0.0314897		3457.89	0.0387649		3457.89	0.0386414
3459.82	0.0617066		3459.82	0.0236122		3459.82	0.0311978		3459.82	0.0384122		3459.82	0.0381722
3461.74	0.0611531		3461.74	0.0233789		3461.74	0.0309102		3461.74	0.0381237		3461.74	0.037798
3463.67	0.0606224		3463.67	0.0231573		3463.67	0.0305934		3463.67	0.0377551		3463.67	0.0375925
3465.6	0.0600181		3465.6	0.0228824		3465.6	0.0303207		3465.6	0.0373808		3465.6	0.0372235
3467.53	0.0593697		3467.53	0.0226088		3467.53	0.0300142		3467.53	0.0369496		3467.53	0.0367822
3469.46	0.0589037		3469.46	0.0224593		3469.46	0.0298047		3469.46	0.0366134		3469.46	0.0365821
3471.39	0.05839		3471.39	0.0222743		3471.39	0.0296023		3471.39	0.0364098		3471.39	0.0363181
3473.32	0.0578618		3473.32	0.0220686		3473.32	0.0293106		3473.32	0.0362341		3473.32	0.0359572
3475.24	0.0572889		3475.24	0.0218576		3475.24	0.028936		3475.24	0.0359664		3475.24	0.0356223
3477.17	0.0568043		3477.17	0.021676		3477.17	0.028698		3477.17	0.0356407		3477.17	0.0354331
3479.1	0.0562442		3479.1	0.0213958		3479.1	0.0284623		3479.1	0.035194		3479.1	0.0349883
3481.03	0.0556724		3481.03	0.0210818		3481.03	0.0281849		3481.03	0.0347919		3481.03	0.0344607
3482.96	0.0551073		3482.96	0.0208093		3482.96	0.0278693		3482.96	0.0344891		3482.96	0.0342083
3484.89	0.0545706		3484.89	0.0206327		3484.89	0.027669		3484.89	0.0342044		3484.89	0.0340765
3486.82	0.0539626		3486.82	0.0203955		3486.82	0.0274296		3486.82	0.0338621		3486.82	0.0336984
3488.74	0.0534639		3488.74	0.0202139		3488.74	0.0272325		3488.74	0.0336308		3488.74	0.0334136
3490.67	0.0529181		3490.67	0.0200286		3490.67	0.0270244		3490.67	0.0333019		3490.67	0.0332025
3492.6	0.0523781		3492.6	0.019784		3492.6	0.0266747		3492.6	0.0329664		3492.6	0.0329266
3494.53	0.0518603		3494.53	0.0194694		3494.53	0.0263193		3494.53	0.0326989		3494.53	0.0325147
3496.46	0.0513064		3496.46	0.0192209		3496.46	0.026026		3496.46	0.0323577		3496.46	0.0320944
3498.39	0.0507152		3498.39	0.0190681		3498.39	0.0257834		3498.39	0.0320143		3498.39	0.0318209
3500.32	0.0501681		3500.32	0.0188571		3500.32	0.0254457		3500.32	0.0317425		3500.32	0.0314142
3502.24	0.0494441		3502.24	0.0185064		3502.24	0.0249452		3502.24	0.0312989		3502.24	0.030629
3504.17	0.0489727		3504.17	0.0183216		3504.17	0.0247541		3504.17	0.0310028		3504.17	0.0304007
3506.1	0.0485971		3506.1	0.0182718		3506.1	0.024752		3506.1	0.0308745		3506.1	0.0305381
3508.03	0.0480884		3508.03	0.0180425		3508.03	0.0244661		3508.03	0.0306382		3508.03	0.0301643
3509.96	0.047461		3509.96	0.0176756		3509.96	0.0240343		3509.96	0.030221		3509.96	0.0297008
3511.89	0.0468835		3511.89	0.017511		3511.89	0.0238099		3511.89	0.0298719		3511.89	0.0296036
3513.81	0.0463126		3513.81	0.0174153		3513.81	0.0236724		3513.81	0.0296124		3513.81	0.0293898
3515.74	0.0459104		3515.74	0.0172667		3515.74	0.0234608		3515.74	0.0294267		3515.74	0.0291443
3517.67	0.0454243		3517.67	0.0169745		3517.67	0.0231075		3517.67	0.0290909		3517.67	0.0288226
3519.6	0.0448532		3519.6	0.016697		3519.6	0.0228217		3519.6	0.0287194		3519.6	0.0284698
3521.53	0.0440511		3521.53	0.0163287		3521.53	0.0223783		3521.53	0.0282424		3521.53	0.0278009
3523.46	0.0432354		3523.46	0.0159575		3523.46	0.0218735		3523.46	0.027761		3523.46	0.0269944
3525.39	0.0427743		3525.39	0.0157592		3525.39	0.0217227		3525.39	0.0275057		3525.39	0.0266572
3527.31	0.042388		3527.31	0.015537		3527.31	0.0215011		3527.31	0.0272245		3527.31	0.0263942
3529.24	0.0418637		3529.24	0.0153529		3529.24	0.0212261		3529.24	0.0269394		3529.24	0.0262476
3531.17	0.0414361		3531.17	0.0152678		3531.17	0.0210905		3531.17	0.0268123		3531.17	0.0263024
3533.1	0.0409634		3533.1	0.015098		3533.1	0.020896		3533.1	0.026531		3533.1	0.0262283
3535.03	0.0402722		3535.03	0.0147712		3535.03	0.0205323		3535.03	0.026066		3535.03	0.0256598
3536.96	0.0395524		3536.96	0.0144548		3536.96	0.0201372		3536.96	0.0256625		3536.96	0.0250669
3538.89	0.0391302		3538.89	0.0143095		3538.89	0.020025		3538.89	0.0253772		3538.89	0.0250109
3540.81	0.0385568		3540.81	0.0140645		3540.81	0.0197507		3540.81	0.0249584		3540.81	0.0247061
3542.74	0.0377895		3542.74	0.013719		3542.74	0.019255		3542.74	0.0244546		3542.74	0.0238975
3544.67	0.0370085		3544.67	0.0132592		3544.67	0.0186663		3544.67	0.0239781		3544.67	0.0229082
3546.6	0.0364423		3546.6	0.0129689		3546.6	0.0183187		3546.6	0.0236889		3546.6	0.0225686
3548.53	0.036055		3548.53	0.0129471		3548.53	0.0182933		3548.53	0.0234905		3548.53	0.0227843
3550.46	0.0355961		3550.46	0.0127639		3550.46	0.0181056		3550.46	0.0232039		3550.46	0.0225906
3552.39	0.0349961		3552.39	0.0123906		3552.39	0.0176862		3552.39	0.0228155		3552.39	0.021999
3554.31	0.0346125		3554.31	0.0123169		3554.31	0.0175457		3554.31	0.0226385		3554.31	0.0220128
3556.24	0.034146		3556.24	0.0122563		3556.24	0.0174143		3556.24	0.0223729		3556.24	0.0220182
3558.17	0.0335315		3558.17	0.0120217		3558.17	0.0171165		3558.17	0.0219221		3558.17	0.0216073
3560.1	0.0328165		3560.1	0.0116188		3560.1	0.0167087		3560.1	0.0214717		3560.1	0.0209423
3562.03	0.0321934		3562.03	0.0113067		3562.03	0.0163043		3562.03	0.0210821		3562.03	0.020378
3563.96	0.031522		3563.96	0.0109284		3563.96	0.0157875		3563.96	0.0206809		3563.96	0.0195316
3565.89	0.0306459		3565.89	0.0103076		3565.89	0.0150574		3565.89	0.0201849		3565.89	0.0181072
3567.81	0.0299269		3567.81	0.00985625		3567.81	0.0146489		3567.81	0.0198039		3567.81	0.0176653
3569.74	0.0298959		3569.74	0.0100879		3569.74	0.0149313		3569.74	0.0196998		3569.74	0.0187453
3571.67	0.0296425		3571.67	0.01019		3571.67	0.0149857		3571.67	0.0195028		3571.67	0.0191725
3573.6	0.0291128		3573.6	0.0101148		3573.6	0.0147912		3573.6	0.0191533		3573.6	0.0188759
3575.53	0.0285278		3575.53	0.00986822		3575.53	0.0144896		3575.53	0.0186978		3575.53	0.0184056
3577.46	0.0280033		3577.46	0.00955266		3577.46	0.0142113		3577.46	0.0183065		3577.46	0.0181259
3579.39	0.0274397		3579.39	0.00922163		3579.39	0.0139143		3579.39	0.0179665		3579.39	0.017779
3581.31	0.0268606		3581.31	0.00898952		3581.31	0.0136456		3581.31	0.0176618		3581.31	0.0174169
3583.24	0.0262166		3583.24	0.00878613		3583.24	0.013341		3583.24	0.0172241		3583.24	0.0168965
3585.17	0.0255349		3585.17	0.0084016		3585.17	0.0128214		3585.17	0.0167577		3585.17	0.0159522
3587.1	0.0247243		3587.1	0.00767604		3587.1	0.0120482		3587.1	0.0162899		3587.1	0.0145893
3589.03	0.0244025		3589.03	0.00762495		3589.03	0.0119639		3589.03	0.016129		3589.03	0.014887
3590.96	0.0241365		3590.96	0.0078778		3590.96	0.0121516		3590.96	0.01597		3590.96	0.0154537
3592.89	0.0235546		3592.89	0.00765486		3592.89	0.0118619		3592.89	0.0156034		3592.89	0.0148936
3594.81	0.022967		3594.81	0.0071772		3594.81	0.0113808		3594.81	0.0152071		3594.81	0.0141631
3596.74	0.0225598		3596.74	0.00696611		3596.74	0.0111981		3596.74	0.0148835		3596.74	0.0140194
3598.67	0.0220509		3598.67	0.00676164		3598.67	0.0109386		3598.67	0.0144811		3598.67	0.0137142
3600.6	0.0215873		3600.6	0.00646915		3600.6	0.0105926		3600.6	0.0141584		3600.6	0.0134178
3602.53	0.0212752		3602.53	0.00641515		3602.53	0.0105183		3602.53	0.0139963		3602.53	0.0135994
3604.46	0.0209415		3604.46	0.00637116		3604.46	0.0104606		3604.46	0.0137789		3604.46	0.013594
3606.39	0.0202608		3606.39	0.00596703		3606.39	0.0100042		3606.39	0.0133524		3606.39	0.0126592
3608.31	0.0195334		3608.31	0.00549333		3608.31	0.00944798		3608.31	0.0129291		3608.31	0.0118228
3610.24	0.0191744		3610.24	0.00538653		3610.24	0.00929342		3610.24	0.012671		3610.24	0.0118772
3612.17	0.0186804		3612.17	0.00510845		3612.17	0.00902308		3612.17	0.0122931		3612.17	0.0113431
3614.1	0.0180109		3614.1	0.00471526		3614.1	0.00858493		3614.1	0.011898		3614.1	0.0106551
3616.03	0.0177389		3616.03	0.00467293		3616.03	0.00843545		3616.03	0.0116735		3616.03	0.0106811
3617.96	0.017172		3617.96	0.00436457		3617.96	0.00801761		3617.96	0.0112998		3617.96	0.00996327
3619.89	0.01658		3619.89	0.00413015		3619.89	0.00767618		3619.89	0.0109414		3619.89	0.00954647
3621.81	0.0165053		3621.81	0.00428305		3621.81	0.00784551		3621.81	0.0108628		3621.81	0.0103696
3623.74	0.0163521		3623.74	0.00431631		3623.74	0.00790155		3623.74	0.0106842		3623.74	0.0107231
3625.67	0.0157821		3625.67	0.00401446		3625.67	0.00758786		3625.67	0.0102726		3625.67	0.0100294
3627.6	0.0148716		3627.6	0.0034342		3627.6	0.00689076		3627.6	0.00985483		3627.6	0.00848775
3629.53	0.0139253		3629.53	0.00278651		3629.53	0.00617122		3629.53	0.00945408		3629.53	0.00744286
3631.46	0.0140143		3631.46	0.00311297		3631.46	0.00657544		3631.46	0.00936919		3631.46	0.00860254
3633.39	0.0138609		3633.39	0.003188		3633.39	0.00664353		3633.39	0.00915683		3633.39	0.00884628
3635.31	0.0135867		3635.31	0.00314805		3635.31	0.00655163		3635.31	0.00889451		3635.31	0.00895353
3637.24	0.0132513		3637.24	0.00309435		3637.24	0.00637029		3637.24	0.00863803		3637.24	0.00893361
3639.17	0.0128515		3639.17	0.00294131		3639.17	0.00614937		3639.17	0.0083263		3639.17	0.00868461
3641.1	0.0123821		3641.1	0.00275123		3641.1	0.00594207		3641.1	0.00798679		3641.1	0.00836248
3643.03	0.0118303		3643.03	0.00252798		3643.03	0.00565282		3643.03	0.0075971		3643.03	0.00791333
3644.96	0.0112484		3644.96	0.00220156		3644.96	0.00519274		3644.96	0.00715763		3644.96	0.00713459
3646.88	0.0101706		3646.88	0.00136302		3646.88	0.00421861		3646.88	0.00644693		3646.88	0.00508136
3648.81	0.00898441		3648.81	0.000365523		3648.81	0.00323497		3648.81	0.00575528		3648.81	0.00296523
3650.74	0.0088521		3650.74	0.000437424		3650.74	0.00329145		3650.74	0.00564275		3650.74	0.00368823
3652.67	0.00925433		3652.67	0.00122091		3652.67	0.00409182		3652.67	0.00582751		3652.67	0.00572066
3654.6	0.00914796		3654.6	0.00134976		3654.6	0.00419194		3654.6	0.00578973		3654.6	0.00601292
3656.53	0.00858206		3656.53	0.00101456		3656.53	0.00378047		3656.53	0.00551507		3656.53	0.00540291
3658.46	0.00828388		3658.46	0.00115407		3658.46	0.00381132		3658.46	0.00531451		3658.46	0.00565661
3660.38	0.00806837		3660.38	0.0012572		3660.38	0.00382619		3660.38	0.0051125		3660.38	0.00581048
3662.31	0.00775898		3662.31	0.00115775		3662.31	0.00366019		3662.31	0.00485175		3662.31	0.00573047
3664.24	0.00732062		3664.24	0.000980847		3664.24	0.00343674		3664.24	0.00453978		3664.24	0.00549051
3666.17	0.00677467		3666.17	0.000755384		3666.17	0.00318653		3666.17	0.00418384		3666.17	0.0048996
3668.1	0.00596484		3668.1	0.000177602		3668.1	0.00254295		3668.1	0.00362988		3668.1	0.00344983
3670.03	0.00503339		3670.03	-0.000575852		3670.03	0.00165245		3670.03	0.00307453		3670.03	0.00174177
3671.95	0.00488968		3671.95	-0.000296382		3671.95	0.0017438		3671.95	0.00311381		3671.95	0.00224439
3673.88	0.00454624		3673.88	-0.000390806		3673.88	0.00148017		3673.88	0.00284438		3673.88	0.00171685
3675.81	0.00367523		3675.81	-0.00115596		3675.81	0.000590651		3675.81	0.00216889		3675.81	0.00014356
3677.74	0.00381967		3677.74	-0.000723773		3677.74	0.00106301		3677.74	0.0023175		3677.74	0.00134025
3679.67	0.00392481		3679.67	-0.000391832		3679.67	0.0014551		3679.67	0.0024712		3679.67	0.00218388
3681.6	0.00401931		3681.6	-0.000140267		3681.6	0.0017096		3681.6	0.00256451		3681.6	0.00281303
3683.53	0.00392639		3683.53	-7.08679e-05		3683.53	0.00170674		3683.53	0.00246933		3683.53	0.0028798
3685.45	0.00356641		3685.45	-0.000177695		3685.45	0.00148927		3685.45	0.0022352		3685.45	0.00239549
3687.38	0.00296166		3687.38	-0.000607982		3687.38	0.00100944		3687.38	0.00186504		3687.38	0.00125135
3689.31	0.00216367		3689.31	-0.00137893		3689.31	0.000246919		3689.31	0.00139277		3689.31	-0.000323665
3691.24	0.00200885		3691.24	-0.00130574		3691.24	0.000227359		3691.24	0.00139433		3691.24	4.73819e-06
3693.17	0.00237264		3693.17	-0.000763069		3693.17	0.000718476		3693.17	0.00163316		3693.17	0.00126046
3695.1	0.00251082		3695.1	-0.0005189		3695.1	0.000919681		3695.1	0.00167088		3695.1	0.00176186
3697.03	0.00242941		3697.03	-0.000500566		3697.03	0.000893616		3697.03	0.00163283		3697.03	0.0017935
3698.95	0.00226158		3698.95	-0.000568043		3698.95	0.00085019		3698.95	0.00155129		3698.95	0.00165295
3700.88	0.00190434		3700.88	-0.000841154		3700.88	0.000579536		3700.88	0.00135165		3700.88	0.000951093
3702.81	0.00171648		3702.81	-0.000909967		3702.81	0.000420509		3702.81	0.00135557		3702.81	0.000752961
3704.74	0.00174962		3704.74	-0.000686723		3704.74	0.000585907		3704.74	0.0014047		3704.74	0.00116134
3706.67	0.00159518		3706.67	-0.000725692		3706.67	0.000567858		3706.67	0.00122972		3706.67	0.00093615
3708.6	0.00117716		3708.6	-0.00114889		3708.6	0.000151449		3708.6	0.00098274		3708.6	-3.45243e-05
3710.53	0.000483197		3710.53	-0.00184001		3710.53	-0.000618172		3710.53	0.00064394		3710.53	-0.00153434
3712.45	0.000509071		3712.45	-0.00177164		3712.45	-0.00057347		3712.45	0.000648453		3712.45	-0.00126315
3714.38	0.00107813		3714.38	-0.00107252		3714.38	0.00011393		3714.38	0.000927384		3714.38	0.00024662
3716.31	0.00131336		3716.31	-0.0007376		3716.31	0.000400444		3716.31	0.0010199		3716.31	0.000879439
3718.24	0.00114513		3718.24	-0.000868833		3718.24	0.000320259		3718.24	0.000858157		3718.24	0.000573697
3720.17	0.000839964		3720.17	-0.00107331		3720.17	0.000151913		3720.17	0.000677257		3720.17	3.24715e-06
3722.1	0.000482003		3722.1	-0.00131337		3722.1	-0.000203826		3722.1	0.000553857		3722.1	-0.000678089
3724.03	0.000303448		3724.03	-0.0014649		3724.03	-0.000412786		3724.03	0.000513948		3724.03	-0.000954139
3725.95	0.000209358		3725.95	-0.00155022		3725.95	-0.000419043		3725.95	0.000552066		3725.95	-0.000983959
3727.88	0.000410327		3727.88	-0.00137847		3727.88	-0.000196904		3727.88	0.000670985		3727.88	-0.000437447
3729.81	0.000514777		3729.81	-0.00124561		3729.81	-0.000132582		3729.81	0.000644172		3729.81	-0.000241248
3731.74	8.5196e-05		3731.74	-0.0016178		3731.74	-0.000578003		3731.74	0.000383199		3731.74	-0.00126342
3733.67	-0.000419837		3733.67	-0.00220836		3733.67	-0.00114998		3733.67	9.82867e-05		3733.67	-0.00268541
3735.6	-0.000613904		3735.6	-0.00256537		3735.6	-0.00139988		3735.6	2.84962e-05		3735.6	-0.00345124
3737.53	-0.000197831		3737.53	-0.00200524		3737.53	-0.000811423		3737.53	0.000232663		3737.53	-0.00208086
3739.45	0.000135374		3739.45	-0.00160139		3739.45	-0.000422883		3739.45	0.000293866		3739.45	-0.00105883
3741.38	0.00013723		3741.38	-0.00156277		3741.38	-0.000397029		3741.38	0.000209491		3741.38	-0.000984092
3743.31	-0.000102637		3743.31	-0.00168501		3743.31	-0.000617147		3743.31	0.000111974		3743.31	-0.00154042
3745.24	-0.000473029		3745.24	-0.00210299		3745.24	-0.00101963		3745.24	-4.28071e-05		3745.24	-0.00218189
3747.17	-0.000401929		3747.17	-0.00205204		3747.17	-0.000851968		3747.17	-4.21776e-05		3747.17	-0.00194742
3749.1	-0.000696548		3749.1	-0.00225461		3749.1	-0.00111337		3749.1	-0.000156		3749.1	-0.00274969
3751.03	-0.000950271		3751.03	-0.00255074		3751.03	-0.00159469		3751.03	-0.000219093		3751.03	-0.00358692
3752.95	-0.000338961		3752.95	-0.00194399		3752.95	-0.000901602		3752.95	0.000104551		3752.95	-0.00199551
3754.88	0.00017737		3754.88	-0.00137213		3754.88	-0.000330585		3754.88	0.000311041		3754.88	-0.00057026
3756.81	0.00019938		3756.81	-0.00133695		3756.81	-0.000373227		3756.81	0.00027384		3756.81	-0.000446252
3758.74	4.22811e-05		3758.74	-0.00152473		3758.74	-0.000502684		3758.74	0.000113267		3758.74	-0.000804213
3760.67	0.000202927		3760.67	-0.00132836		3760.67	-0.000239162		3760.67	0.000165404		3760.67	-0.000272508
3762.6	0.000525194		3762.6	-0.000967463		3762.6	0.00014535		3762.6	0.00034105		3762.6	0.000485818
3764.53	0.000467972		3764.53	-0.0010934		3764.53	8.59582e-05		3764.53	0.000297148		3764.53	0.000225237
3766.45	0.000353353		3766.45	-0.0012392		3766.45	-1.48438e-05		3766.45	0.000306532		3766.45	2.08749e-05
3768.38	0.00027941		3768.38	-0.00117771		3768.38	-0.000128674		3768.38	0.000349406		3768.38	-5.39389e-05
3770.31	0.000171171		3770.31	-0.00130405		3770.31	-0.000261945		3770.31	0.00038615		3770.31	-0.000298104
3772.24	0.000456827		3772.24	-0.00106058		3772.24	9.16584e-05		3772.24	0.000496665		3772.24	0.000434306
3774.17	0.000645334		3774.17	-0.000843337		3774.17	0.000341945		3774.17	0.000508839		3774.17	0.000921573
3776.1	0.000569649		3776.1	-0.000878058		3776.1	0.000333357		3776.1	0.000489632		3776.1	0.000807763
3778.03	0.000305603		3778.03	-0.0010745		3778.03	4.66221e-05		3778.03	0.000402533		3778.03	0.000158178
3779.95	0.000208098		3779.95	-0.0012201		3779.95	-0.000116848		3779.95	0.000320193		3779.95	-0.000151363
3781.88	0.00042293		3781.88	-0.000996753		3781.88	0.000120161		3781.88	0.00040648		3781.88	0.000414638
3783.81	0.00033717		3783.81	-0.00106101		3783.81	3.27377e-05		3783.81	0.000340354		3783.81	0.000211778
3785.74	0.000306697		3785.74	-0.00115124		3785.74	-4.60561e-06		3785.74	0.000339292		3785.74	0.000110715
3787.67	0.000484458		3787.67	-0.00094551		3787.67	0.000242609		3787.67	0.000499816		3787.67	0.000622538
3789.6	0.000584082		3789.6	-0.000837549		3789.6	0.000383364		3789.6	0.000539459		3789.6	0.000863436
3791.53	0.000555118		3791.53	-0.000811952		3791.53	0.000386183		3791.53	0.000508441		3791.53	0.000877048
3793.45	0.00045351		3793.45	-0.000862087		3793.45	0.000268999		3793.45	0.000439447		3793.45	0.00068801
3795.38	0.000184397		3795.38	-0.00112692		3795.38	-8.26616e-05		3795.38	0.000243139		3795.38	-8.54112e-05
3797.31	-7.15305e-05		3797.31	-0.00137666		3797.31	-0.000335783		3797.31	0.000140842		3797.31	-0.000754634
3799.24	-0.000221113		3799.24	-0.00142894		3799.24	-0.000361673		3799.24	0.000139948		3799.24	-0.00100369
3801.17	-0.000654467		3801.17	-0.00194254		3801.17	-0.000923391		3801.17	-3.68104e-05		3801.17	-0.00215235
3803.1	-0.000409377		3803.1	-0.00181912		3803.1	-0.000756751		3803.1	0.000143229		3803.1	-0.001483
3805.03	-9.54156e-05		3805.03	-0.00137461		3805.03	-0.000358329		3805.03	0.000317673		3805.03	-0.000629653
3806.95	-0.000155536		3806.95	-0.00148864		3806.95	-0.000420863		3806.95	0.000246786		3806.95	-0.000805073
3808.88	0.000147803		3808.88	-0.00125106		3808.88	-1.78589e-05		3808.88	0.00043623		3808.88	-1.06028e-05
3810.81	0.000382038		3810.81	-0.000945973		3810.81	0.000323542		3810.81	0.000573398		3810.81	0.000603193
3812.74	0.000363434		3812.74	-0.000903784		3812.74	0.000321519		3812.74	0.000472815		3812.74	0.000491391
3814.67	7.06475e-05		3814.67	-0.00120441		3814.67	-4.74785e-05		3814.67	0.000185192		3814.67	-0.000393388
3816.6	-0.000242341		3816.6	-0.00164464		3816.6	-0.000400472		3816.6	-6.08298e-05		3816.6	-0.00125205
3818.53	-0.000263402		3818.53	-0.00162213		3818.53	-0.000437811		3818.53	-8.42186e-05		3818.53	-0.00128618
3820.45	-0.000669553		3820.45	-0.00207704		3820.45	-0.00100865		3820.45	-0.000342405		3820.45	-0.00231222
3822.38	-0.000585911		3822.38	-0.00194521		3822.38	-0.000861293		3822.38	-0.000182		3822.38	-0.0017751
3824.31	-0.000158286		3824.31	-0.0013168		3824.31	-0.000289627		3824.31	0.000139583		3824.31	-0.000619165
3826.24	-7.79243e-05		3826.24	-0.00129272		3826.24	-0.000289263		3826.24	0.000147438		3826.24	-0.000526777
3828.17	6.49807e-05		3828.17	-0.00123451		3828.17	-0.000169679		3828.17	0.000268535		3828.17	-0.000193493
3830.1	8.0722e-05		3830.1	-0.00119952		3830.1	-0.000114695		3830.1	0.000332229		3830.1	-9.87282e-05
3832.03	-0.000131589		3832.03	-0.00137438		3832.03	-0.000300687		3832.03	0.000223679		3832.03	-0.000546169
3833.95	-0.000225452		3833.95	-0.00142709		3833.95	-0.000295521		3833.95	0.000143163		3833.95	-0.000770775
3835.88	-0.000440823		3835.88	-0.00165886		3835.88	-0.000525486		3835.88	-2.5148e-05		3835.88	-0.00141206
3837.81	-0.000792638		3837.81	-0.00207555		3837.81	-0.00103556		3837.81	-0.000211476		3837.81	-0.002352
3839.74	-0.000912976		3839.74	-0.00217483		3839.74	-0.00113941		3839.74	-0.000241182		3839.74	-0.00255137
3841.67	-0.000516385		3841.67	-0.00175164		3841.67	-0.000657875		3841.67	1.02716e-06		3841.67	-0.00152487
3843.6	-0.000182033		3843.6	-0.0014616		3843.6	-0.00029519		3843.6	0.000196264		3843.6	-0.000818368
3845.53	0.000104352		3845.53	-0.00113353		3845.53	5.04661e-05		3845.53	0.000407209		3845.53	-9.58793e-05
3847.45	0.00014429		3847.45	-0.000996191		3847.45	0.000192651		3847.45	0.000421769		3847.45	0.000212574
3849.38	-6.31158e-05		3849.38	-0.00125602		3849.38	-4.72134e-05		3849.38	0.000169083		3849.38	-0.000362931
3851.31	-0.00052264		3851.31	-0.00174392		3851.31	-0.000648876		3851.31	-0.000201243		3851.31	-0.00178985
3853.24	-0.0013858		3853.24	-0.00250989		3853.24	-0.00149964		3853.24	-0.000533329		3853.24	-0.003746
3855.17	-0.000915819		3855.17	-0.00213335		3855.17	-0.000979563		3855.17	-0.000163883		3855.17	-0.00228539
3857.1	-0.000280157		3857.1	-0.00154435		3857.1	-0.00045211		3857.1	2.08749e-05		3857.1	-0.000870155
3859.03	4.00609e-05		3859.03	-0.00108884		3859.03	-8.98502e-05		3859.03	0.00020601		3859.03	-7.7593e-05
3860.95	-8.70675e-05		3860.95	-0.00117001		3860.95	-0.000143944		3860.95	0.000258987		3860.95	-0.000310686
3862.88	-0.000474386		3862.88	-0.00162529		3862.88	-0.000500566		3862.88	0.000121983		3862.88	-0.00122595
3864.81	-0.00055388		3864.81	-0.00180305		3864.81	-0.000638487		3864.81	3.65815e-05		3864.81	-0.00152038
3866.74	-0.000207668		3866.74	-0.00140225		3866.74	-0.000305488		3866.74	0.000155592		3866.74	-0.000750963
3868.67	-0.000362567		3868.67	-0.00148006		3868.67	-0.000465913		3868.67	-6.69302e-06		3868.67	-0.00114711
3870.6	-0.000591404		3870.6	-0.00191707		3870.6	-0.00087247		3870.6	-0.000163982		3870.6	-0.00180252
3872.52	-0.000369552		3872.52	-0.00162767		3872.52	-0.000544051		3872.52	2.44868e-05		3872.52	-0.00117698
3874.45	-0.000339425		3874.45	-0.00153087		3874.45	-0.000366176		3874.45	0.000174221		3874.45	-0.00086956
3876.38	3.41282e-06		3876.38	-0.00114189		3876.38	4.7815e-05		3876.38	0.000404258		3876.38	8.57925e-05
3878.31	2.8695e-05		3878.31	-0.00101751		3878.31	2.98879e-05		3878.31	0.000369801		3878.31	3.33341e-05
3880.24	-0.000383423		3880.24	-0.0014149		3880.24	-0.000393189		3880.24	0.000173027		3880.24	-0.000969281
3882.17	-0.000346378		3882.17	-0.00152711		3882.17	-0.000335187		3882.17	0.000201038		3882.17	-0.00087624
3884.1	-0.000219888		3884.1	-0.0014151		3884.1	-0.00024552		3884.1	0.00023031		3884.1	-0.000790819
3886.02	-0.00015388		3886.02	-0.00147167		3886.02	-0.000296349		3886.02	0.000276691		3886.02	-0.000826735
3887.95	6.2429e-05		3887.95	-0.00119192		3887.95	3.64475e-07		3887.95	0.000435766		3887.95	7.52149e-06
3889.88	-7.6566e-05		3889.88	-0.00120328		3889.88	-0.000101246		3889.88	0.000329013		3889.88	-0.000180841
3891.81	-0.000338465		3891.81	-0.00148911		3891.81	-0.000430529		3891.81	0.000128944		3891.81	-0.000855605
3893.74	-9.4488e-05		3893.74	-0.00123646		3893.74	-0.000155503		3893.74	0.000248576		3893.74	-0.00027317
3895.67	0.000156719		3895.67	-0.00101169		3895.67	0.00010402		3895.67	0.000376035		3895.67	0.00027437
3897.59	1.0603e-05		3897.59	-0.00119549		3897.59	-5.12553e-05		3897.59	0.000304642		3897.59	-0.000208164
3899.52	-0.000330817		3899.52	-0.00156765		3899.52	-0.00036836		3899.52	0.000153968		3899.52	-0.00111776
3901.45	-0.0004583		3901.45	-0.00173322		3901.45	-0.000555733		3901.45	4.73843e-05		3901.45	-0.00150489
3903.38	-0.000634616		3903.38	-0.00190295		3903.38	-0.000725559		3903.38	-4.4828e-05		3903.38	-0.0017854
3905.31	-0.000490273		3905.31	-0.00177583		3905.31	-0.000479284		3905.31	6.99516e-05		3905.31	-0.00121634
3907.24	4.83453e-05		3907.24	-0.00118273		3907.24	5.96454e-05		3907.24	0.000347914		3907.24	8.01918e-05
3909.17	0.000350036		3909.17	-0.000857159		3909.17	0.000337933		3909.17	0.00051136		3909.17	0.000758504
3911.09	0.000408005		3911.09	-0.000815359		3911.09	0.000396298		3911.09	0.000554952		3911.09	0.000816228
3913.02	0.000379716		3913.02	-0.000817343		3913.02	0.000434804		3913.02	0.000564009		3913.02	0.000731553
3914.95	0.00017558		3914.95	-0.000926598		3914.95	0.00028614		3914.95	0.000457192		3914.95	0.000308422
3916.88	-7.14311e-05		3916.88	-0.00116033		3916.88	-1.07022e-05		3916.88	0.000297281		3916.88	-0.000233466
3918.81	-5.78813e-05		3918.81	-0.00117219		3918.81	-2.83618e-05		3918.81	0.000329743		3918.81	-0.000152555
3920.74	4.23805e-05		3920.74	-0.00108065		3920.74	0.000103523		3920.74	0.000420575		3920.74	0.000102164
3922.67	3.18098e-05		3922.67	-0.00103487		3922.67	7.0515e-05		3922.67	0.000447175		3922.67	-1.11329e-05
3924.59	-7.72286e-05		3924.59	-0.00115593		3924.59	-8.02764e-05		3924.59	0.000415501		3924.59	-0.000379782
3926.52	6.31249e-05		3926.52	-0.00107774		3926.52	8.61239e-05		3926.52	0.000495172		3926.52	8.86095e-05
3928.45	9.9778e-05		3928.45	-0.00104571		3928.45	0.00014545		3928.45	0.000481406		3928.45	0.000256168
3930.38	8.94628e-06		3930.38	-0.00116697		3930.38	2.39566e-05		3930.38	0.000341282		3930.38	-7.91169e-05
3932.31	-2.98206e-07		3932.31	-0.0011944		3932.31	-3.87666e-06		3932.31	0.000310279		3932.31	-0.000127845
3934.24	0.000119796		3934.24	-0.00104277		3934.24	0.000203988		3934.24	0.000416496		3934.24	0.000281863
3936.17	0.0002381		3936.17	-0.000890492		3936.17	0.00035647		3936.17	0.000508043		3936.17	0.000614076
3938.09	0.000265219		3938.09	-0.000854117		3938.09	0.000318104		3938.09	0.000497726		3938.09	0.000641783
3940.02	0.000223348		3940.02	-0.000835367		3940.02	0.000239758		3940.02	0.000462134		3940.02	0.000504029
3941.95	3.85697e-05		3941.95	-0.000978736		3941.95	8.57594e-05		3941.95	0.000355674		3941.95	2.75684e-05
3943.88	1.83898e-05		3943.88	-0.000978373		3943.88	9.50057e-05		3943.88	0.000395668		3943.88	1.05699e-05
3945.81	0.000141141		3945.81	-0.000889466		3945.81	0.000214132		3945.81	0.000534914		3945.81	0.000329245
3947.74	7.66789e-05		3947.74	-0.00102885		3947.74	7.13435e-05		3947.74	0.000503399		3947.74	7.58173e-05
3949.67	2.82974e-05		3949.67	-0.00105149		3949.67	-5.06948e-06		3949.67	0.00046429		3949.67	-8.20984e-05
3951.59	0.000169845		3951.59	-0.000923391		3951.59	0.000121122		3951.59	0.000480875		3951.59	0.000231536
3953.52	0.000311903		3953.52	-0.000868634		3953.52	0.000208297		3953.52	0.000520748		3953.52	0.000505588
3955.45	0.000303846		3955.45	-0.000889037		3955.45	0.000269563		3955.45	0.000572801		3955.45	0.000580631
3957.38	0.000258357		3957.38	-0.000899056		3957.38	0.000331367		3957.38	0.000564805		3957.38	0.000591779
3959.31	0.000236807		3959.31	-0.000878819		3959.31	0.000410758		3959.31	0.00053153		3959.31	0.000580366
3961.24	0.000216684		3961.24	-0.000890194		3961.24	0.000377826		3961.24	0.000519455		3961.24	0.000476132
3963.17	0.000220563		3963.17	-0.000872933		3963.17	0.000336109		3963.17	0.000520549		3963.17	0.000487543
3965.09	0.000284483		3965.09	-0.000796143		3965.09	0.000418187		3965.09	0.000554023		3965.09	0.000630568
3967.02	0.000310643		3967.02	-0.000791282		3967.02	0.000460642		3967.02	0.000601335		3967.02	0.000696273
3968.95	0.000300232		3968.95	-0.000825346		3968.95	0.000396331		3968.95	0.00056736		3968.95	0.000689636
3970.88	0.000298972		3970.88	-0.000793498		3970.88	0.000297414		3970.88	0.000540819		3970.88	0.000622372
3972.81	0.000242476		3972.81	-0.000799351		3972.81	0.000203159		3972.81	0.000551833		3972.81	0.000506351
3974.74	0.000205612		3974.74	-0.000854944		3974.74	0.000219635		3974.74	0.000561156		3974.74	0.000493845
3976.67	0.000266247		3976.67	-0.000849521		3976.67	0.000296784		3976.67	0.000525691		3976.67	0.000635578
3978.59	0.00029675		3978.59	-0.000768328		3978.59	0.000313561		3978.59	0.000554454		3978.59	0.000730424
3980.52	0.000313362		3980.52	-0.000792836		3980.52	0.000278084		3980.52	0.000595031		3980.52	0.000747053
3982.45	0.00037252		3982.45	-0.000828554		3982.45	0.000328449		3982.45	0.000588926		3982.45	0.000777623
3984.38	0.00037567		3984.38	-0.000739816		3984.38	0.000414008		3984.38	0.000586803		3984.38	0.000786087
3986.31	0.000347185		3986.31	-0.000693405		3986.31	0.000354745		3986.31	0.000622969		3986.31	0.000764379
3988.24	0.00032142		3988.24	-0.00074835		3988.24	0.000328085		3988.24	0.000627382		3988.24	0.000684459
3990.17	0.000269961		3990.17	-0.000818302		3990.17	0.000337767		3990.17	0.000595595		3990.17	0.000612019
3992.09	0.000266612		3992.09	-0.000805966		3992.09	0.000330903		3992.09	0.000608602		3992.09	0.000679049
3994.02	0.000248875		3994.02	-0.000819228		3994.02	0.000315418		3994.02	0.000590917		3994.02	0.000676295
3995.95	0.00027122		3995.95	-0.000829216		3995.95	0.000344631		3995.95	0.000543838		3995.95	0.000692523
3997.88	0.000338364		3997.88	-0.00081139		3997.88	0.000407077		3997.88	0.000546061		3997.88	0.000792759
3999.81	0.000365987		3999.81	-0.000793299		3999.81	0.000392319		3999.81	0.000546392		3999.81	0.000794784
4001.74	0		4001.74	0		4001.74	0		4001.74	0		4001.74	0
